# Supplementary material for: 2-Aryl-perfluorobenzoxazoles: synthesis, fluorescence properties and synthetic applications in cubic platinum nanoparticles
Source: Royal Society of Chemistry journal article supplement (doi:10.1039/d1tc03338g), 2021-01-01

*Supporting Information*  
*For*

**2-Aryl-Perfluorobenzoxazoles: Synthesis, Fluorescence Properties  
and Synthetic Application in Cubic Platinum Nanoparticles**

Rong Wang,<sup>a,b,+</sup> Hao Lu,<sup>b+</sup> Mingpan Yan,<sup>b+</sup> Mengfan Li,<sup>b+</sup> Xiangyu Lv,<sup>c</sup> Hongwen Huang,<sup>b</sup> Arash Ghaderi,<sup>d</sup>  
Takanori Iwasaki,<sup>c,e</sup> Ablimit Abdukader,<sup>a,\*</sup> Nobuaki Kambe,<sup>c,\*</sup> and Renhua Qiu<sup>a,b,c,\*</sup>

<sup>a</sup> State Key Laboratory of Chemistry and Utilization of Carbon Based Energy Resources; College of Chemistry, Xinjiang University, Urumqi, 830046, PR China.

<sup>b</sup> College of Chemistry and Chemical Engineering, College of Material Science and Chemical Engineering, Hunan University, Changsha, 410082, P. R. China

<sup>c</sup> The Institute of Scientific and Industrial Research, Osaka University, Ibaraki-shi, Osaka 567-0047, Japan

<sup>d</sup> Department of Chemistry, College of Sciences, University of Hormozgan, Bandar Abbas, 7916193145, Iran

<sup>e</sup> Department of Chemistry and Biotechnology, The University of Tokyo, Tokyo 113-8656, Japan

## Contents

|                                                                                                                             |    |
|-----------------------------------------------------------------------------------------------------------------------------|----|
| 1. General information .....                                                                                                | 3  |
| 2. Experimental section .....                                                                                               | 3  |
| 2.1 General procedure for the synthesis of perfluorobenzoxazole compounds <b>3a</b> – <b>3x</b> .....                       | 3  |
| 2.2 Procedure for preparation of compound <b>4</b> .....                                                                    | 4  |
| 3. Analysis data for product .....                                                                                          | 5  |
| 3.1 Analysis Data for product <b>3a</b> – <b>3x</b> .....                                                                   | 5  |
| 3.2 Analysis data for product <b>4a</b> – <b>4l</b> .....                                                                   | 15 |
| 4. X-ray Information of <b>3c</b> (CCDC 2076932) .....                                                                      | 21 |
| 5. Fluorescence Spectra of Solvents Screening, Absorption of <b>3a</b> – <b>3u</b> , <b>4a</b> – <b>4l</b> .....            | 22 |
| 5.1 The fluorescence emission spectra of solvents screening <b>3d</b> .....                                                 | 22 |
| 5.2 Absorption of <b>3a</b> – <b>3u</b> , <b>4a</b> – <b>4l</b> .....                                                       | 23 |
| 5.3 The Fluorescence Emission Spectra of <b>3a</b> – <b>3u</b> , <b>4a</b> – <b>4l</b> .....                                | 25 |
| 6. Optical data table <b>3a</b> – <b>3u</b> , <b>4a</b> – <b>4l</b> .....                                                   | 27 |
| 6.1 The measured photophysical properties of <b>3a</b> – <b>3u</b> .....                                                    | 27 |
| 6.2 The measured photophysical properties of <b>4a</b> – <b>4l</b> .....                                                    | 28 |
| 7. Preparation and characterization of platinum nanomaterials of compound <b>4l</b> and CTAB .....                          | 29 |
| 7.1 General preparation process of platinum nanomaterials of compound <b>4l</b> .....                                       | 29 |
| 7.2 General preparation process of platinum nanomaterials of CTAB .....                                                     | 29 |
| 7.3 Transmission Electron Microscopic (TEM) characterization of platinum nanomaterials of compound <b>4l</b> and CTAB ..... | 30 |
| 8. <sup>1</sup> H, <sup>13</sup> C, <sup>19</sup> F NMR and HRMS spectra for the compound .....                             | 32 |

## 1. General information

All reagents were purchased from commercial suppliers and used as received unless otherwise noted. The reaction of the product was observed by 254 nm ultraviolet radiation, and further analyzed by GC-MS. Finally, the product was separated and purified by column chromatography. Proton, carbon and fluorine nuclear magnetic resonance spectrum ( $^1\text{H}$ ,  $^{13}\text{C}$  and  $^{19}\text{F}$  NMR) were recorded on a Bruker-400 (400 MHz for  $^1\text{H}$  NMR, 101 MHz for  $^{13}\text{C}$  NMR and 376 MHz for  $^{19}\text{F}$  NMR) spectrometer with solvent resonance as the internal standard ( $^1\text{H}$  NMR,  $\text{CDCl}_3$  at 7.26 ppm, DMSO at 2.50 ppm;  $^{13}\text{C}$  NMR,  $\text{CDCl}_3$  at 77.00 ppm, DMSO at 39.52 ppm. The chemical shift of the  $^1\text{H}$  NMR spectrum is reported as  $\delta$ , in parts per million (ppm), downfield of  $(\text{CH}_3)_4\text{Si}$  ( $\delta$  0.0) and relative to the signal of  $(\text{CH}_3)_4\text{Si}$  ( $\delta$  0.00, Singlet). Chemical shifts, multiplets (s = singlet, d = doublet, t = triplet, q = quadruple, m = multiplet) and coupling constants ( $J$ ) have been reported in Hertz.

## 2. Experimental section

### 2.1 General procedure for the synthesis of perfluorobenzoxazole compounds 3a –

3x

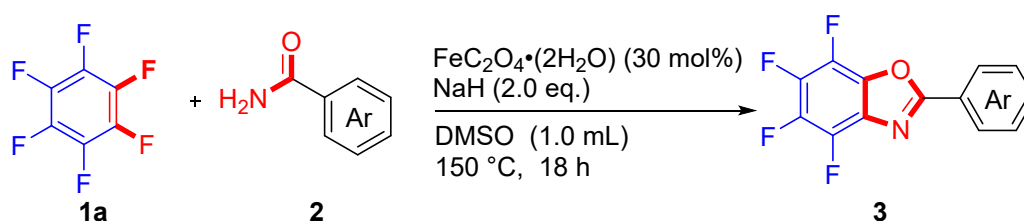

Weight **1a** (22.3 mg, 0.12 mmol), **2** (0.1 mmol),  $\text{FeC}_2\text{O}_4 \cdot (2\text{H}_2\text{O})$  (5.4 mg, 30 mol%),  $\text{NaH}$  (4.8 mg, 0.2 mmol) in a 10.0 mL reaction tube equipped with a magnetic stir bar in the glove box, and then inject 1.0 mL of anhydrous DMSO. The reaction solution was heated to  $150\text{ }^\circ\text{C}$  and stirred for 18 hours under nitrogen. After the reaction finished, the reaction mixture was cooled to room temperature, and the aqueous phase was extracted 3 times with ethylacetate. The organic layer was dried over  $\text{Na}_2\text{SO}_4$  and concentrated under reduced pressure. The residue was purified by flash column chromatography on silica gel and eluted with petroleum ether to obtain crude compound **3**. The crude product was separated by GPC (gel permeation chromatography) to obtain the main compound.

## 2.2 Procedure for preparation of compound 4

The general process 1

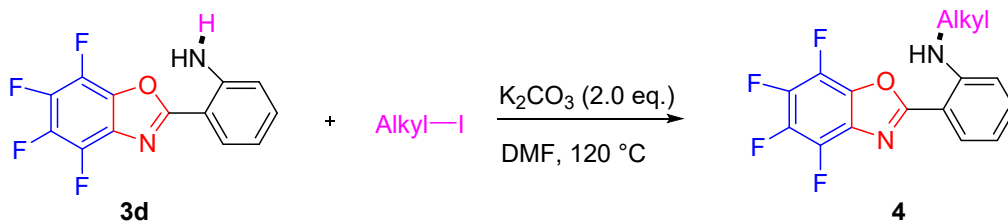

The general process 2

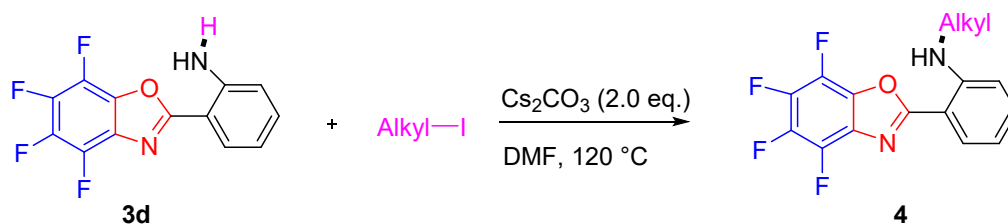

**The general process 1:** The mixture of **3d** (56.4 mg, 0.2 mmol), Alkyl iodide (0.4 mmol),  $K_2CO_3$  (55.2 mg, 0.4 mmol) were added in the Schlenk tube of 10.0 mL equipped with a magnetic stir bar, then inject 2.0 mL of anhydrous DMF. The reaction solution was heated to 120 °C and stirred for 12 hours under nitrogen. After the reaction finished, the reaction mixture was cooled to room temperature and extracted with ethylacetate ( $3 \times 5.0$  mL). The organic layer was dried over  $Na_2SO_4$  and concentrated under reduced pressure. The residue was purified by flash column chromatography on silica gel and eluted with petroleum ether / ethylacetate (100:1, v/v) to afford the compound **4**. The crude product was separated by GPC gel permeation chromatography to obtain the main compound **4**.

**The general process 2:** The mixture of **3d** (56.4 mg, 0.2 mmol), Alkyl iodide (0.4 mmol),  $Cs_2CO_3$  (112.4mg, 0.4 mmol) were added in the Schlenk tube of 10.0 mL equipped with a magnetic stir bar, then inject 2.0 mL of anhydrous DMF. The reaction solution was heated to 120 °C and stirred for 12 hours under nitrogen. After the reaction finished, the reaction mixture was cooled to room temperature and extracted with ethylacetate ( $3 \times 5.0$  mL), The organic layer was dried over  $Na_2SO_4$  and concentrated under reduced pressure. The residue was purified by flash column chromatography on silica gel and eluted with petroleum ether / ethylacetate (100:1, v/v) to afford the

compound **4**. The crude product was separated by GPC (gel permeation chromatography) to obtain the main compound **4**.

### 3. Analysis data for product

#### 3.1 Analysis Data for product **3a** – **3x**

Because of the magnetic properties of fluorine nucleus, the exact assignment of all carbons bearing fluorine were not possible due to the large C-F spin-spin splitting.

##### 4,5,6,7-tetrafluoro-2-(*p*-tolyl)benzo[*d*]oxazole (**3a**)

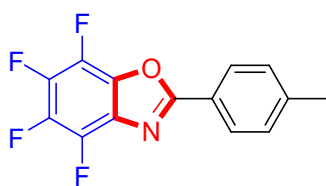

The compound was prepared according to the procedure mentioned above. The title compound was obtained as a white solid, 72% yield. MP: 168 - 170 °C.  $^1\text{H}$  NMR (400 MHz,  $\text{CDCl}_3$ )  $\delta$  8.13 (d,  $J = 7.8$  Hz, 2H), 7.35 (d,  $J = 7.8$  Hz, 2H), 2.45 (s, 3H).  $^{19}\text{F}$  NMR (376 MHz,  $\text{CDCl}_3$ )  $\delta$  -151.31 – -151.84 (m), -158.81 – -159.16 (m), -159.84 (t,  $J = 20.0$  Hz), -161.80 (t,  $J = 19.9$  Hz).  $^{13}\text{C}$  NMR (101 MHz,  $\text{CDCl}_3$ )  $\delta$  165.3, 143.6, 129.9, 128.0, 122.6, 21.7. HRMS-ESI ( $m/z$ ): calcd for  $\text{C}_{14}\text{H}_8\text{NOF}_4$ ,  $[\text{M}+\text{H}]$ : 282.0542; found 282.0539.

##### 4,5,6,7-tetrafluoro-2-phenylbenzo[*d*]oxazole (**3b**)

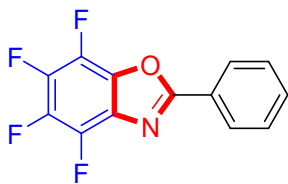

The compound was prepared according to the procedure mentioned above. The title compound was obtained as a white solid, 73% yield. MP: 105 - 107 °C.  $^1\text{H}$  NMR (400 MHz,  $\text{CDCl}_3$ )  $\delta$  8.25 (d,  $J = 7.6$  Hz, 2H), 7.62 -7.53 (m, 3H).  $^{19}\text{F}$  NMR (376 MHz,  $\text{CDCl}_3$ )  $\delta$  -150.54 – -151.72 (m), -158.39 – -159.02 (m), -159.34 (t,  $J = 19.9$  Hz), -161.53 (t,  $J = 19.8$  Hz).  $^{13}\text{C}$  NMR (101 MHz,  $\text{CDCl}_3$ )  $\delta$  165.0, 132.7, 129.1, 128.1, 125.4. HRMS-ESI ( $m/z$ ): calcd for  $\text{C}_{13}\text{H}_6\text{NOF}_4$ ,  $[\text{M}+\text{H}]$ : 268.0386; found 268.0382.

4,5,6,7-tetrafluoro-2-(4-methoxyphenyl)benzo[*d*]oxazole (**3c**)

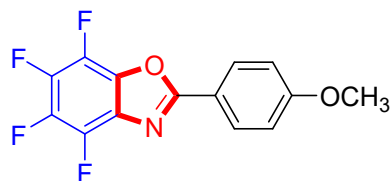

The compound was prepared according to the procedure mentioned above. The title compound was obtained as a white solid, 60% yield. MP: 125 - 127 °C. <sup>1</sup>H NMR (400 MHz, DMSO) δ 8.14 (d, *J* = 8.0 Hz, 2H), 7.17 (d, *J* = 8.0 Hz, 2H), 3.88 (s, 3H). <sup>19</sup>F NMR (376 MHz, DMSO) δ -153.08 – 153.18 (m), -159.05 – -159.18 (m), -161.45 (t, *J* = 21.4 Hz), -163.14 (t, *J* = 21.2 Hz). <sup>13</sup>C NMR (101 MHz, DMSO) δ 165.2, 163.5, 130.3, 117.3, 115.4, 56.1. HRMS-ESI (*m/z*): calcd for C<sub>14</sub>H<sub>8</sub>NO<sub>2</sub>F<sub>4</sub>, [M+H]: 298.0491; found, 298.0493.

2-(perfluorobenzo[*d*]oxazol-2-yl)aniline (**3d**)

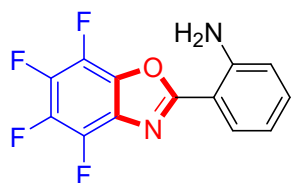

The compound was prepared according to the procedure mentioned above. The title compound was obtained as a white solid, 72% yield. MP: 213 - 215 °C. <sup>1</sup>H NMR (400 MHz, DMSO) δ 7.90 (s, 1H), 7.38 (s, 1H), 7.11 (s, 2H), 6.98 (s, 1H), 6.74 (s, 1H). <sup>19</sup>F NMR (376 MHz, DMSO) δ -153.42 (t, *J* = 17.5 Hz), -159.43 (t, *J* = 17.0 Hz), -161.68 (t, *J* = 20.8 Hz), -163.27 (t, *J* = 20.4 Hz). <sup>13</sup>C NMR (101 MHz, DMSO) δ 165.3, 149.7, 134.2, 128.7, 116.8, 116.1, 104.8. HRMS-ESI (*m/z*): calcd for C<sub>13</sub>H<sub>7</sub>N<sub>2</sub>OF<sub>4</sub>, [M+H]: 283.0495; found, 283 .0494.

3-(4,5,6,7-tetrafluoro-5,6-dihydrobenzo[*d*]oxazol-2-yl)aniline (**3e**)

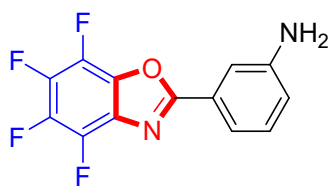

The compound was prepared according to the procedure mentioned above. The title compound was obtained as a white solid, 64% yield. MP: 184 - 186 °C.  $^1\text{H}$  NMR (400 MHz, DMSO)  $\delta$  7.41 (s, 1H), 7.31 (d,  $J$  = 7.6 Hz, 1H), 7.25 (t,  $J$  = 7.8 Hz, 1H), 6.87 – 6.78 (m, 1H), 5.59 (s, 2H).  $^{19}\text{F}$  NMR (376 MHz, DMSO)  $\delta$  -152.89 – -152.99 (m), -159.01 – -159.11 (m), -160.97 (t,  $J$  = 21.5 Hz), -163.02 (t,  $J$  = 21.3 Hz).  $^{13}\text{C}$  NMR (101 MHz, DMSO)  $\delta$  165.8, 150.0, 130.4, 125.5, 118.7, 115.3, 112.6. HRMS-ESI ( $m/z$ ): calcd for  $\text{C}_{13}\text{H}_7\text{N}_2\text{OF}_4$ ,  $[\text{M}+\text{H}]$ : 283.0495; found, 283.0494.

#### 4-(4,5,6,7-tetrafluoro-5,6-dihydrobenzo[*d*]oxazol-2-yl)aniline (**3f**)

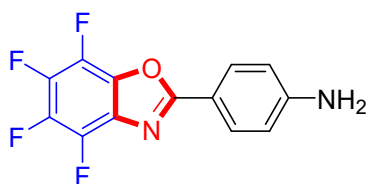

The compound was prepared according to the procedure mentioned above. The title compound was obtained as a white solid, 56% yield. MP: 190 - 192 °C.  $^1\text{H}$  NMR (400 MHz,  $\text{CDCl}_3$ )  $\delta$  8.05 (d,  $J$  = 7.9 Hz, 2H), 6.76 (d,  $J$  = 8.0 Hz, 2H), 4.16 (s, 2H).  $^{19}\text{F}$  NMR (376 MHz,  $\text{CDCl}_3$ )  $\delta$  -152.13 – -153.26 (m), -159.24 – -159.91 (m), -161.33 (t,  $J$  = 20.0 Hz), -162.52 (t,  $J$  = 20.0 Hz).  $^{13}\text{C}$  NMR (101 MHz,  $\text{CDCl}_3$ )  $\delta$  160.5, 150.7, 130.0, 114.6. One carbon was lost due to overlap. HRMS-ESI ( $m/z$ ): calcd for  $\text{C}_{13}\text{H}_7\text{N}_2\text{OF}_4$ ,  $[\text{M}+\text{H}]$ : 283.0495; found, 283.0493.

#### 4,5,6,7-tetrafluoro-2-(3-(trifluoromethyl)phenyl)benzo[*d*]oxazole(**3g**)

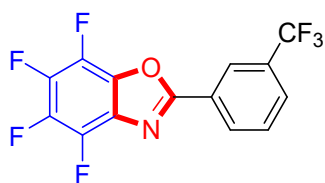

The compound was prepared according to the procedure mentioned above. The title compound was obtained as a white solid, 73% yield. MP: 89 - 91 °C.  $^1\text{H}$  NMR (400

MHz, DMSO)  $\delta$  8.52 (d,  $J$  = 7.8 Hz, 1H), 8.44 (s, 1H), 8.10 (d,  $J$  = 7.7 Hz, 1H), 7.91 (t,  $J$  = 7.8 Hz, 1H).  $^{19}\text{F}$  NMR (376 MHz, DMSO)  $\delta$  -61.57 (s), -152.15 (dd,  $J$  = 21.0, 16.4 Hz), -158.50 (dd,  $J$  = 21.3, 16.4 Hz), -159.38 (t,  $J$  = 21.3 Hz), -162.07 (t,  $J$  = 21.1 Hz).  $^{13}\text{C}$  NMR (101 MHz, DMSO)  $\delta$  131.8, 131.0, 125.8, 124.0 (q,  $J$  = 3.7 Hz). HRMS-ESI ( $m/z$ ): calcd for  $\text{C}_{14}\text{H}_5\text{NOF}_7$ ,  $[\text{M}+\text{H}]$ : 336.0259; found, 336.0258.

4,5,6,7-tetrafluoro-2-(4-(trifluoromethyl)phenyl)benzo[*d*]oxazole (**3h**)

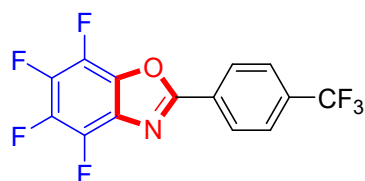

The compound was prepared according to the procedure mentioned above. The title compound was obtained as a white solid, 75% yield. MP: 104 - 106 °C.  $^1\text{H}$  NMR (400 MHz, DMSO)  $\delta$  8.37 (d,  $J$  = 7.9 Hz, 2H), 7.98 (d,  $J$  = 8.0 Hz, 2H).  $^{19}\text{F}$  NMR (376 MHz, DMSO)  $\delta$  -61.90 (s), -152.02 – 152.11 (m), -158.29 – -158.80 (m), -159.27 (t,  $J$  = 21.2 Hz), -162.10 (t,  $J$  = 21.0 Hz).  $^{13}\text{C}$  NMR (101 MHz, DMSO)  $\delta$  163.58 (s), 132.85 (q,  $J$  = 32.4 Hz), 129.06 (s), 128.78 (s), 126.84 (q,  $J$  = 3.7 Hz), 124.1 (q,  $J$  = 273.7 Hz). HRMS-ESI ( $m/z$ ): calcd for  $\text{C}_{14}\text{H}_5\text{NOF}_7$ ,  $[\text{M}+\text{H}]$ : 336.0259; found 336.0264.

2-(4-chlorophenyl)-4,5,6,7-tetrafluorobenzo[*d*]oxazole (**3i**)

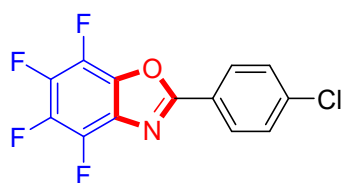

The compound was prepared according to the procedure mentioned above. The title compound was obtained as a white solid, 79% yield. MP: 124 - 126 °C.  $^1\text{H}$  NMR (400 MHz, DMSO)  $\delta$  8.22 (d,  $J$  = 7.9 Hz, 2H), 7.72 (d,  $J$  = 7.9 Hz, 2H).  $^{19}\text{F}$  NMR (376 MHz, DMSO)  $\delta$  -152.38 – 152.49 (m), -157.95 – -158.99 (m), -159.98 (t,  $J$  = 21.3 Hz), -162.41 (t,  $J$  = 21.2 Hz).  $^{13}\text{C}$  NMR (101 MHz, DMSO)  $\delta$  164.2, 138.5, 130.2, 130.1, 124.1. HRMS-ESI ( $m/z$ ): calcd for  $\text{C}_{13}\text{H}_5\text{NOF}_4\text{Cl}$ ,  $[\text{M}+\text{H}]$ : 301.9996; found, 301.9999.

2-(3-bromophenyl)-4,5,6,7-tetrafluorobenzo[d]oxazole (**3j**)

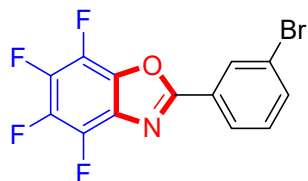

The compound was prepared according to the procedure A. The title compound was obtained as a white solid, 71% yield. MP: 109 - 111 °C. <sup>1</sup>H NMR (400 MHz, DMSO) δ 8.23 (s, 1H), 8.14 (d, *J* = 7.8 Hz, 1H), 7.85 (d, *J* = 8.0 Hz, 1H), 7.54 (t, *J* = 7.8 Hz, 1H). <sup>19</sup>F NMR (376 MHz, DMSO) δ -152.16 – 152.26 (m), -158.26 – -158.74 (m), -159.58 (t, *J* = 21.3 Hz), -162.19 (t, *J* = 21.2 Hz). <sup>13</sup>C NMR (101 MHz, DMSO) δ 163.5, 136.2, 132.2, 130.4, 127.3, 123.0. One carbon was lost due to overlap. HRMS-ESI (*m/z*): calcd for C<sub>13</sub>H<sub>5</sub>NOF<sub>4</sub>Br, [M+H]<sup>+</sup>: 345.9491; found, 345.9493.

2-(4-bromophenyl)-4,5,6,7-tetrafluorobenzo[d]oxazole (**3k**)

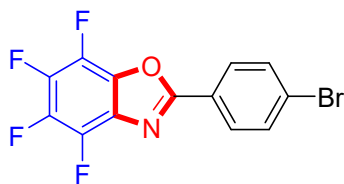

The compound was prepared according to the procedure mentioned above. The title compound was obtained as a white solid, 76% yield. MP: 152 - 153 °C. <sup>1</sup>H NMR (400 MHz, DMSO) δ 8.15 (d, *J* = 7.7 Hz, 2H), 7.86 (d, *J* = 7.8 Hz, 2H). <sup>19</sup>F NMR (376 MHz, DMSO) δ -152.37 – -152.47 (m), -158.43 – -158.94 (m), -159.94 (t, *J* = 21.4 Hz), -162.39 (t, *J* = 21.2 Hz). <sup>13</sup>C NMR (101 MHz, DMSO) δ 163.8, 132.6, 129.7, 127.0, 123.9. HRMS-ESI (*m/z*): calcd for C<sub>13</sub>H<sub>5</sub>NOF<sub>4</sub>Br, [M+H]<sup>+</sup>: 345.9491; found 345.9490.

4,5,6,7-tetrafluoro-2-(naphthalen-2-yl)benzo[d]oxazole (**3l**)

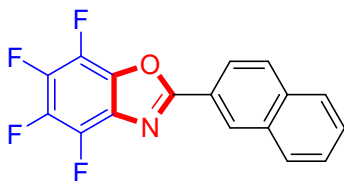

The compound was prepared according to the procedure mentioned above. The title compound was obtained as a white solid, 69% yield. MP: 235 - 237 °C. <sup>1</sup>H NMR (400 MHz, CDCl<sub>3</sub>) δ 8.82 (s, 1H), 8.30 (d, *J* = 8.6 Hz, 1H), 8.06 – 7.98 (m, 2H), 7.93 (d, *J* = 7.8 Hz, 1H), 7.69 – 7.55 (m, 2H). <sup>19</sup>F NMR (376 MHz, CDCl<sub>3</sub>) δ -150.84 – -151.47 (m), -158.47 – -158.96 (m), -159.24 (t, *J* = 19.9 Hz), -161.43 (t, *J* = 19.8 Hz). <sup>13</sup>C NMR (101 MHz, CDCl<sub>3</sub>) δ 135.2, 132.8, 129.2, 129.1, 129.0, 128.6, 128.0, 127.3, 123.8, 122.6. HRMS-ESI (*m/z*): calcd for C<sub>17</sub>H<sub>8</sub>NOF<sub>4</sub>, [*M*+*H*]: 318.0542; found 318.0544.

2-(3,4-difluorophenyl)-4,5,6,7-tetrafluorobenzo[*d*]oxazole (**3m**)

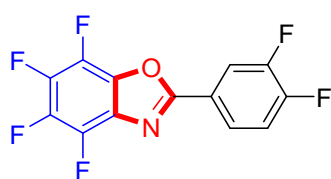

The compound was prepared according to the procedure mentioned above. The title compound was obtained as a white solid, 63% yield. MP: 90 - 92 °C. <sup>1</sup>H NMR (400 MHz, DMSO) δ 8.29 – 8.19 (m, 1H), 8.07 (s, 1H), 7.72 (q, 9.0 Hz, 1H). <sup>19</sup>F NMR (376 MHz, DMSO) δ -130.94 – -131.03 (m), -135.52 – -136.88 (m), -152.23 – -152.33 (m), -157.34 – -158.95 (m), -159.77 (t, *J* = 21.3 Hz), -162.29 (t, *J* = 21.1 Hz). <sup>13</sup>C NMR (101 MHz, DMSO) δ 162.7, 152.4 (dd, *J* = 254.0, 12.3 Hz), 149.7 (dd, *J* = 234.4, 14.0 Hz), 125.6 (dd, *J* = 7.8, 3.6 Hz), 122.1 (dd, *J* = 6.8, 3.4 Hz), 119.1 (d, *J* = 18.2 Hz), 117.2 (d, *J* = 19.9 Hz). HRMS-ESI (*m/z*): calcd for C<sub>13</sub>H<sub>4</sub>NOF<sub>6</sub>, [*M*+*H*]: 304.0197; found, 304.0197.

5-methyl-2-(perfluorobenzo[*d*]oxazol-2-yl)aniline (**3n**)

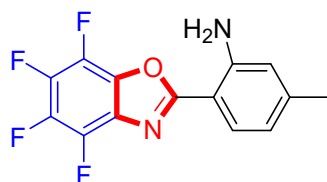

The compound was prepared according to the procedure mentioned above. The title compound was obtained as a white solid, 65% yield. MP: 195 - 197 °C. <sup>1</sup>H NMR (400 MHz, DMSO) δ 7.70 (d, *J* = 8.2 Hz, 1H), 6.96 (s, 2H), 6.70 (s, 1H), 6.50 (d, *J* = 8.2 Hz, 1H), 2.24 (s, 3H). <sup>19</sup>F NMR (376 MHz, DMSO) δ -153.63 – 153.73 (m), -158.83 – -

160.41 (m), -162.20 (t,  $J = 21.4$  Hz), -163.54 (t,  $J = 21.2$  Hz).  $^{13}\text{C}$  NMR (101 MHz, DMSO)  $\delta$  164.9, 149.2, 144.1, 128.1, 117.2, 116.0, 102.1, 21.3. HRMS-ESI ( $m/z$ ): calcd for  $\text{C}_{14}\text{H}_9\text{N}_2\text{OF}_4$ ,  $[\text{M}+\text{H}]$ : 297.0651; found, 297.0649.

4-methoxy-2-(perfluorobenzo[d]oxazol-2-yl)aniline (**3o**)

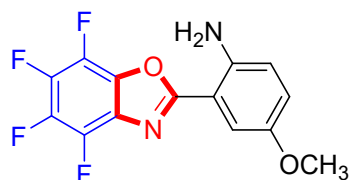

The compound was prepared according to the procedure mentioned above. The title compound was obtained as a white solid, 62% yield. MP: 71 - 72 °C.  $^1\text{H}$  NMR (400 MHz, DMSO)  $\delta$  7.26 (s, 1H), 7.04 (d,  $J = 9.0$  Hz, 1H), 6.90 (d,  $J = 9.0$  Hz, 1H), 6.74 (s, 2H), 3.75 (s, 3H).  $^{19}\text{F}$  NMR (376 MHz, DMSO)  $\delta$  -153.43 (dd,  $J = 21.0, 16.1$  Hz), -158.80 – -159.52 (m), -161.66 (t,  $J = 21.5$  Hz), -163.21 (t,  $J = 21.2$  Hz).  $^{13}\text{C}$  NMR (101 MHz, DMSO)  $\delta$  164.7, 149.7, 144.3, 123.4, 118.2, 109.3, 103.8, 55.5. HRMS-ESI ( $m/z$ ): calcd for  $\text{C}_{14}\text{H}_9\text{N}_2\text{O}_2\text{F}_4$ ,  $[\text{M}+\text{H}]$ : 313.0600; found 313.0602.

5-chloro-2-(perfluorobenzo[d]oxazol-2-yl)aniline (**3p**)

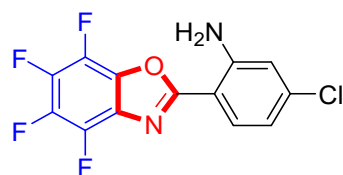

The compound was prepared according to the procedure mentioned above. The title compound was obtained as a white solid, 71% yield. MP: 181 - 182 °C.  $^1\text{H}$  NMR (400 MHz, DMSO)  $\delta$  7.77 (s, 1H), 7.18 (s, 2H), 6.92 (s, 1H), 6.64 (s, 1H).  $^{19}\text{F}$  NMR (376 MHz, DMSO)  $\delta$  -152.81 – -153.53 (m), -159.05 – -159.61 (m), -161.23 (t,  $J = 20.8$  Hz), -163.01 (t,  $J = 20.8$  Hz).  $^{13}\text{C}$  NMR (101 MHz, DMSO)  $\delta$  163.9, 149.8, 138.3, 130.0, 115.6, 114.9, 103.4. HRMS-ESI ( $m/z$ ): calcd for  $\text{C}_{13}\text{H}_6\text{N}_2\text{OF}_4\text{Cl}$ ,  $[\text{M}+\text{H}]$ : 317.0105; found, 317.0104.

2-chloro-5-(perfluorobenzo[d]oxazol-2-yl)aniline (**3q**)

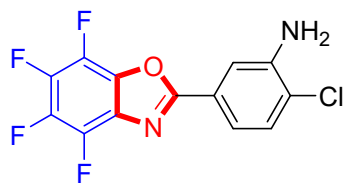

The compound was prepared according to the procedure mentioned above. The title compound was obtained as a white solid, 62% yield. MP: 205 - 207 °C. <sup>1</sup>H NMR (400 MHz, DMSO) δ 7.67 (s, 1H), 7.44 (d, *J* = 8.2 Hz, 1H), 7.34 (d, *J* = 8.2 Hz, 1H), 5.83 (s, 2H). <sup>19</sup>F NMR (376 MHz, DMSO) δ -152.79 (dd, *J* = 21.0, 16.3 Hz), -158.19 – -159.40 (m), -160.58 (t, *J* = 21.4 Hz), -162.78 (t, *J* = 21.1 Hz). <sup>13</sup>C NMR (101 MHz, DMSO) δ 164.4, 145.6, 130.2, 123.9, 121.5, 115.6, 113.7. HRMS-ESI (*m/z*): calcd for C<sub>13</sub>H<sub>6</sub>N<sub>2</sub>OF<sub>4</sub>Cl, [M+H]: 317.0105; found, 317.0107.

#### 4-chloro-2-(perfluorobenzo[*d*]oxazol-2-yl)aniline (**3r**)

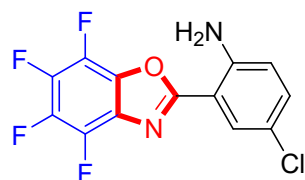

The compound was prepared according to the procedure mentioned above. The title compound was obtained as a white solid, 76% yield. MP: 182 - 184 °C. <sup>1</sup>H NMR (400 MHz, DMSO) δ 7.75 (s, 1H), 7.33 (d, *J* = 9.0 Hz, 1H), 7.17 (s, 2H), 6.95 (d, *J* = 8.9 Hz, 1H). <sup>19</sup>F NMR (376 MHz, DMSO) δ -153.01 (dd, *J* = 21.0, 16.1 Hz), -158.79 – -159.46 (m), -160.88 (t, *J* = 21.4 Hz), -162.80 (t, *J* = 21.2 Hz). <sup>13</sup>C NMR (101 MHz, DMSO) δ 163.5, 147.9, 133.4, 126.8, 118.8, 118.3, 105.2. HRMS-ESI (*m/z*): calcd for C<sub>13</sub>H<sub>6</sub>N<sub>2</sub>OF<sub>4</sub>Cl, [M+H]: 317.0105; found, 317.0105.

#### 4-fluoro-2-(perfluorobenzo[*d*]oxazol-2-yl)aniline (**3s**)

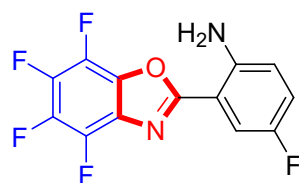

The compound was prepared according to the procedure mentioned above. The title compound was obtained as a white solid, 60% yield. MP: 179 - 181 °C. <sup>1</sup>H NMR (400

MHz, DMSO)  $\delta$  7.50 (d,  $J$  = 9.3 Hz, 1H), 7.23 (t,  $J$  = 7.7 Hz, 1H), 6.93 (s, 3H).  $^{19}\text{F}$  NMR (376 MHz, DMSO)  $\delta$  -127.27 – -129.70 (m), -153.13 (dd,  $J$  = 21.0, 16.1 Hz), -158.99 – -159.35 (m), -161.05 (t,  $J$  = 21.3 Hz), -162.93 (t,  $J$  = 21.1 Hz).  $^{13}\text{C}$  NMR (101 MHz, DMSO)  $\delta$  163.8, 152.9 (d,  $J$  = 231.8 Hz), 146.1, 121.9 (d,  $J$  = 23.5 Hz), 118.0 (d,  $J$  = 7.4 Hz), 112.5 (d,  $J$  = 24.3 Hz), 103.7 (d,  $J$  = 8.1 Hz). HRMS-ESI ( $m/z$ ): calcd for  $\text{C}_{13}\text{H}_6\text{N}_2\text{OF}_5$ ,  $[\text{M}+\text{H}]$ : 301.0400; found, 301.0398.

4-bromo-2-(perfluorobenzo[d]oxazol-2-yl)aniline (**3t**)

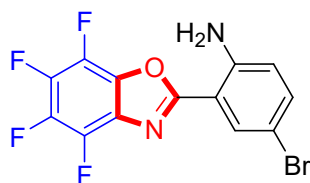

The compound was prepared according to the procedure mentioned above. The title compound was obtained as a white solid, 64% yield. MP: 190 - 192 °C.  $^1\text{H}$  NMR (400 MHz, DMSO)  $\delta$  7.90 – 7.64 (m, 1H), 7.48 – 7.28 (m, 1H), 7.13 (s, 2H), 6.84 (d,  $J$  = 8.5 Hz, 1H).  $^{19}\text{F}$  NMR (376 MHz, DMSO)  $\delta$  -152.95 (dd,  $J$  = 20.7, 16.4 Hz), -158.62 – -159.30 (m), -160.83 (t,  $J$  = 21.3 Hz), -162.74 (t,  $J$  = 21.1 Hz).  $^{13}\text{C}$  NMR (101 MHz, DMSO)  $\delta$  163.2, 148.1, 135.9, 129.5, 118.4, 105.6. One carbon was lost due to overlap. HRMS-ESI ( $m/z$ ): calcd for  $\text{C}_{13}\text{H}_6\text{N}_2\text{OF}_4\text{Br}$ ,  $[\text{M}+\text{H}]$ : 360.9600; found, 360.9601.

5-nitro-2-(perfluorobenzo[d]oxazol-2-yl)aniline (**3u**)

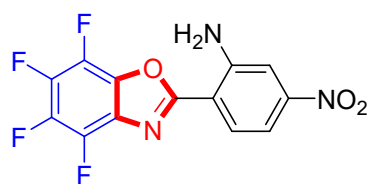

The compound was prepared according to the procedure mentioned above. The title compound was obtained as a yellow solid, 58% yield. MP: 202 - 204 °C.  $^1\text{H}$  NMR (400 MHz, DMSO)  $\delta$  8.13 (d,  $J$  = 8.8 Hz, 1H), 7.80 (s, 1H), 7.54 (s, 2H), 7.42 (d,  $J$  = 8.6 Hz, 1H).  $^{19}\text{F}$  NMR (376 MHz, DMSO)  $\delta$  -152.36 (dd,  $J$  = 21.0, 16.3 Hz), -158.45 – -159.16 (m), -159.88 (t,  $J$  = 21.4 Hz), -162.38 (t,  $J$  = 21.1 Hz).  $^{13}\text{C}$  NMR (101 MHz, DMSO)  $\delta$  163.1, 150.3, 149.3, 130.4, 110.6, 109.1. One carbon was lost due to overlap. HRMS-ESI ( $m/z$ ): calcd for  $\text{C}_{13}\text{H}_6\text{N}_3\text{O}_3\text{F}_4$ ,  $[\text{M}+\text{H}]$ : 328.0345; found, 328.0344.

2-(perfluorobenzo[d]oxazol-2-yl)phenol (**3v**)

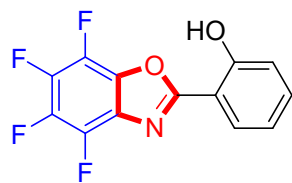

The compound was prepared according to the procedure mentioned above. The title compound was obtained as a white solid, 59% yield. MP: 222 - 224 °C. <sup>1</sup>H NMR (400 MHz, DMSO) δ 10.92 (s, 1H), 7.81 (d, *J* = 7.6 Hz, 1H), 7.68 (t, *J* = 7.6 Hz, 1H), 7.44 – 7.37 (m, 2H). <sup>19</sup>F NMR (376 MHz, DMSO) δ -150.15 (dd, *J* = 23.2, 6.8 Hz), -158.66 (dd, *J* = 23.2, 6.8 Hz), -161.73 (t, *J* = 23.0 Hz), -162.43 (t, *J* = 22.9 Hz). <sup>13</sup>C NMR (101 MHz, DMSO) δ 164.9, 158.1, 135.0, 132.0, 126.7, 125.1, 120.4. HRMS-ESI (*m/z*): calcd for C<sub>13</sub>H<sub>6</sub>NO<sub>2</sub>F<sub>4</sub>, [M+H]: 284.0335; found, 284.0331.

4-bromo-2-(perfluorobenzo[d]oxazol-2-yl)phenol (**3w**)

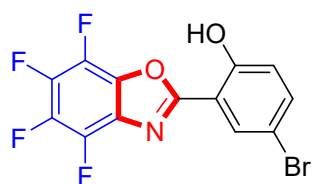

The compound was prepared according to the procedure mentioned above. The title compound was obtained as a white solid, 54% yield. MP: 226 - 228 °C. <sup>1</sup>H NMR (400 MHz, DMSO) δ 11.06 (s, 1H), 8.03 – 7.73 (m, 2H), 7.35 (d, *J* = 8.5 Hz, 1H). <sup>19</sup>F NMR (376 MHz, DMSO) δ -149.84 (dd, *J* = 23.1, 6.7 Hz), -158.29 (dd, *J* = 23.2, 6.8 Hz), -161.37 (t, *J* = 23.0 Hz), -162.04 (t, *J* = 23.0 Hz). <sup>13</sup>C NMR (101 MHz, DMSO) δ 163.5, 157.2, 137.4, 134.1, 127.2, 122.9, 118.5. HRMS-ESI (*m/z*): calcd for C<sub>13</sub>H<sub>5</sub>NO<sub>2</sub>F<sub>4</sub>Br, [M+H]: 361.9440; found, 361.9450.

4,5,6,7-tetrafluoro-2-(pyridin-2-yl)benzo[d]oxazole (**3x**)

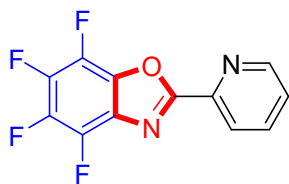

The compound was prepared according to the procedure mentioned above. The title compound was obtained as a white solid, 51% yield. MP: 101 - 103 °C.  $^1\text{H}$  NMR (400 MHz, DMSO)  $\delta$  8.21 (s, 2H), 7.71 (s, 2H).  $^{13}\text{C}$  NMR (101 MHz, DMSO)  $\delta$  163.7, 156.7, 138.0, 129.7, 129.6, 123.6.  $^{19}\text{F}$  NMR (376 MHz, DMSO)  $\delta$  -152.23 – -152.55 (m), -158.56 – -159.03 (m), -160.00 (t,  $J$  = 20.1 Hz), -162.43 (t,  $J$  = 20.6 Hz). HRMS-ESI ( $m/z$ ): calcd for  $\text{C}_{12}\text{H}_5\text{N}_2\text{OF}_4$ ,  $[\text{M}+\text{H}]$ : 269.0338; found, 269.0339.

### 3.2 Analysis data for product 4a – 4l

#### *N*-methyl-2-(perfluorobenzo[*d*]oxazol-2-yl)aniline (**4a**)

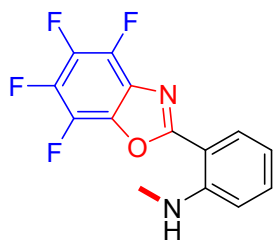

The representative **general procedure 1** mentioned above was followed. The title compound was obtained as a white solid, 56% yield. MP: 212 - 215 °C.  $^1\text{H}$  NMR (400 MHz,  $\text{CDCl}_3$ )  $\delta$  8.05 (d,  $J$  = 8.0 Hz, 1H), 7.93 (s, 1H), 7.43 (t,  $J$  = 7.7 Hz, 1H), 6.92 – 6.44 (m, 2H), 3.07 (d,  $J$  = 3.1 Hz, 3H).  $^{19}\text{F}$  NMR (376 MHz,  $\text{CDCl}_3$ )  $\delta$  -152.17 – -152.31 (m), -158.82 – -159.55 (m), -160.51 (t,  $J$  = 20.1 Hz), -162.24 (t,  $J$  = 19.9 Hz).  $^{13}\text{C}$  NMR (101 MHz,  $\text{CDCl}_3$ )  $\delta$  165.2, 149.5, 134.2, 129.3, 115.3, 110.8, 106.1, 29.8. HRMS-ESI ( $m/z$ ): calcd for  $\text{C}_{14}\text{H}_9\text{N}_2\text{OF}_4$ ,  $[\text{M}+\text{H}]$ : 297.0651; found 297.0657.

#### *N*-ethyl-2-(perfluorobenzo[*d*]oxazol-2-yl)aniline (**4b**)

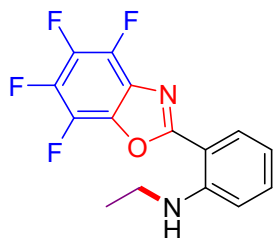

The representative **general procedure 1** mentioned above was followed. The title compound was obtained as a white solid, 60% yield. MP: 159 - 161 °C. <sup>1</sup>H NMR (400 MHz, CDCl<sub>3</sub>) δ 8.03 (d, *J* = 7.9 Hz, 1H), 7.92 (s, 1H), 7.39 (t, *J* = 7.7 Hz, 1H), 6.78 (d, *J* = 8.5 Hz, 1H), 6.71 (t, *J* = 7.4 Hz, 1H), 3.63 – 3.00 (m, 2H), 1.41 (t, *J* = 7.1 Hz, 3H). <sup>19</sup>F NMR (376 MHz, CDCl<sub>3</sub>) δ -151.87 – -153.49 (m), -158.98 – -159.75 (m), -160.65 (t, *J* = 20.1 Hz), -162.38 (t, *J* = 19.9 Hz). <sup>13</sup>C NMR (101 MHz, CDCl<sub>3</sub>) δ 165.2, 148.6, 134.1, 129.3, 115.1, 111.2, 105.8, 37.6, 14.5. HRMS-ESI (*m/z*): calcd for C<sub>15</sub>H<sub>11</sub>N<sub>2</sub>OF<sub>4</sub>, [M+H]: 311.0808; found 311.0815.

*N*-butyl-2-(perfluorobenzo[*d*]oxazol-2-yl)aniline (**4c**)

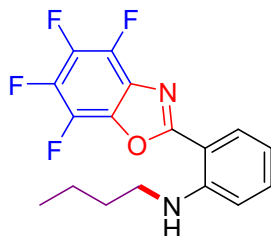

The representative **general procedure 2** mentioned above was followed. The title compound was obtained as a white solid, 48% yield. MP: 98 - 100 °C. <sup>1</sup>H NMR (400 MHz, CDCl<sub>3</sub>) δ 8.04 (d, *J* = 7.8 Hz, 2H), 7.39 (t, *J* = 7.7 Hz, 1H), 6.79 (d, *J* = 8.5 Hz, 1H), 6.71 (t, *J* = 7.4 Hz, 1H), 3.33 (dd, *J* = 12.1, 6.0 Hz, 2H), 1.85 – 1.68 (m, 2H), 1.55 (d, *J* = 7.5 Hz, 2H), 1.02 (t, *J* = 7.2 Hz, 3H). <sup>19</sup>F NMR (376 MHz, CDCl<sub>3</sub>) δ -151.94 – -153.04 (m), -158.74 – -159.88 (m), -160.68 (t, *J* = 20.1 Hz), -162.40 (t, *J* = 19.9 Hz). <sup>13</sup>C NMR (101 MHz, CDCl<sub>3</sub>) δ 165.3, 148.8, 134.1, 129.3, 115.0, 111.2, 105.8, 42.8, 31.1, 20.3, 13.8. HRMS-ESI (*m/z*): calcd for C<sub>17</sub>H<sub>15</sub>N<sub>2</sub>OF<sub>4</sub>, [M+H]: 339.1121; found, 339.1123.

*N*-pentyl-2-(perfluorobenzo[*d*]oxazol-2-yl)aniline (**4d**)

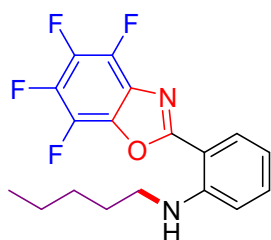

The representative **general procedure 2** mentioned above was followed. The title

compound was obtained as a white solid, 44% yield. MP: 71 - 73 °C.  $^1\text{H}$  NMR (400 MHz,  $\text{CDCl}_3$ )  $\delta$  8.02 (d,  $J = 7.6$  Hz, 2H), 7.38 (t,  $J = 7.7$  Hz, 1H), 6.77 (d,  $J = 8.5$  Hz, 1H), 6.70 (t,  $J = 7.5$  Hz, 1H), 3.31 (dd,  $J = 11.7, 5.6$  Hz, 2H), 1.87 – 1.72 (m, 2H), 1.54 – 1.42 (m, 4H), 0.96 (t,  $J = 6.9$  Hz, 3H).  $^{19}\text{F}$  NMR (376 MHz,  $\text{CDCl}_3$ )  $\delta$  -152.02 – -152.83 (m), -159.00 – -159.90 (m), -160.71 (t,  $J = 20.1$  Hz), -162.42 (t,  $J = 19.9$  Hz).  $^{13}\text{C}$  NMR (101 MHz,  $\text{CDCl}_3$ )  $\delta$  165.3, 148.8, 134.0, 129.3, 115.0, 111.2, 105.8, 43.0, 29.4, 28.8, 22.5, 14.0. HRMS-ESI ( $m/z$ ): calcd for  $\text{C}_{18}\text{H}_{17}\text{N}_2\text{OF}_4$ ,  $[\text{M}+\text{H}]$ : 353.1277; found, 353.1277 .

*N*-hexyl-2-(perfluorobenzo[*d*]oxazol-2-yl)aniline (**4e**)

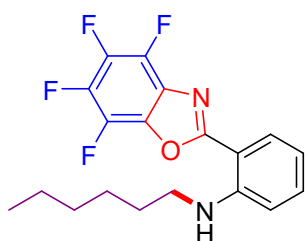

The representative **general procedure 2** mentioned above was followed. The title compound was obtained as a white solid, 41% yield. MP: 66 - 68 °C.  $^1\text{H}$  NMR (400 MHz,  $\text{CDCl}_3$ )  $\delta$  8.04 (d,  $J = 7.6$  Hz, 2H), 7.39 (t,  $J = 7.7$  Hz, 1H), 6.78 (d,  $J = 8.5$  Hz, 1H), 6.71 (t,  $J = 7.4$  Hz, 1H), 3.63 – 3.08 (m, 2H), 1.87 – 1.71 (m, 2H), 1.60 – 1.48 (m, 2H), 1.38 (s, 4H), 0.91 (t,  $J = 11.4$  Hz, 3H).  $^{19}\text{F}$  NMR (376 MHz,  $\text{CDCl}_3$ )  $\delta$  -152.22 – -153.13 (m), -158.42 – -159.68 (m), -160.69 (t,  $J = 20.1$  Hz), -162.39 (t,  $J = 19.9$  Hz).  $^{13}\text{C}$  NMR (101 MHz,  $\text{CDCl}_3$ )  $\delta$  165.3, 148.8, 134.1, 129.3, 115.0, 111.2, 105.8, 43.0, 31.6, 29.0, 26.8, 22.6, 14.0. HRMS-ESI ( $m/z$ ): calcd for  $\text{C}_{19}\text{H}_{19}\text{N}_2\text{OF}_4$ ,  $[\text{M}+\text{H}]$ : 367.1434; found, 367.1431.

*N*-heptyl-2-(perfluorobenzo[*d*]oxazol-2-yl)aniline (**4f**)

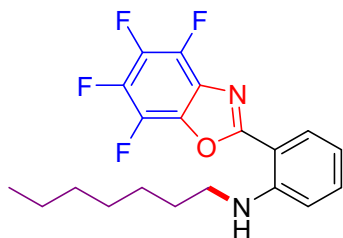

The compound was prepared according to the procedure B. The title compound was obtained as a white solid, 46% yield. MP: 70 - 72 °C. <sup>1</sup>H NMR (400 MHz, CDCl<sub>3</sub>) δ 8.10 – 7.82 (m, 2H), 7.39 – 7.30 (m, 1H), 6.71 (d, *J* = 8.5 Hz, 1H), 6.69 – 6.63 (m, 1H), 3.29 – 3.24 (m, 2H), 1.85 – 1.68 (m, 2H), 1.52 – 1.47 (m, 2H), 1.44 – 1.22 (m, 6H), 1.04 – 0.80 (m, 3H). <sup>19</sup>F NMR (376 MHz, CDCl<sub>3</sub>) δ -152.66 (dd, *J* = 19.8, 16.6 Hz), -159.42 – -159.52 (m), -160.82 (dd, *J* = 26.1, 14.4 Hz), -162.16 – -163.33 (m). <sup>13</sup>C NMR (101 MHz, CDCl<sub>3</sub>) δ 165.1 (d, *J* = 2.4 Hz), 148.6, 133.9, 129.1, 114.9, 111.1, 105.6, 43.0, 31.8, 29.1, 29.0, 27.2, 22.6, 14.0. HRMS-ESI (*m/z*): calcd for C<sub>20</sub>H<sub>21</sub>N<sub>2</sub>OF<sub>4</sub>, [M+H]: 381.1590; found, 381.1583.

*N*-octyl-2-(perfluorobenzo[*d*]oxazol-2-yl)aniline (**4g**)

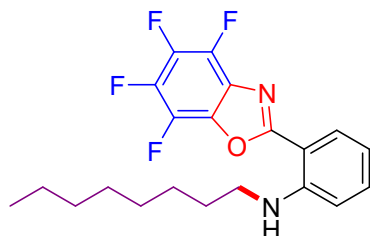

The representative **general procedure 2** mentioned above was followed. The title compound was obtained as a white solid, 50% yield. MP: 73 - 74 °C. <sup>1</sup>H NMR (400 MHz, CDCl<sub>3</sub>) δ 8.05 (dd, *J* = 7.9, 1.4 Hz, 2H), 7.40 (dd, *J* = 11.4, 4.2 Hz, 1H), 6.79 (d, *J* = 8.5 Hz, 1H), 6.72 (t, *J* = 7.5 Hz, 1H), 3.32 (dd, *J* = 12.1, 6.9 Hz, 2H), 1.86 – 1.70 (m, 2H), 1.55 – 1.46 (m, 2H), 1.45 – 1.19 (m, 8H), 0.89 (t, *J* = 6.8 Hz, 3H). <sup>19</sup>F NMR (376 MHz, CDCl<sub>3</sub>) δ -152.45 (dd, *J* = 19.8, 16.6 Hz), -159.01 – -159.87 (m), -160.63 (t, *J* = 20.1 Hz), -162.36 (t, *J* = 20.0 Hz). <sup>13</sup>C NMR (101 MHz, CDCl<sub>3</sub>) δ 165.3, 148.8, 134.1, 129.3, 115.0, 111.2, 105.8, 43.0, 31.8, 29.4, 29.3, 29.0, 27.2, 22.6, 14.1. HRMS-ESI(*m/z*): calcd for C<sub>21</sub>H<sub>23</sub>N<sub>2</sub>OF<sub>4</sub>, [M+H]: 395.1747; found, 395.1751.

*N*-nonyl-2-(perfluorobenzo[*d*]oxazol-2-yl)aniline (**4h**)

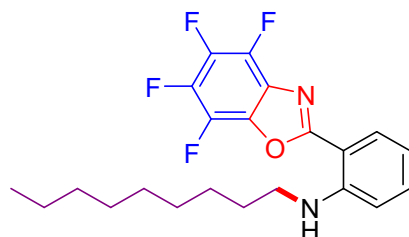

The representative **general procedure 2** mentioned above was followed. The title compound was obtained as a white solid, 43% yield. MP: 79 - 80 °C. <sup>1</sup>H NMR (400 MHz, CDCl<sub>3</sub>) δ 8.05 (d, *J* = 6.7 Hz, 2H), 7.40 (t, *J* = 7.8 Hz, 1H), 6.79 (d, *J* = 8.5 Hz, 1H), 6.72 (t, *J* = 7.5 Hz, 1H), 3.32 (dd, *J* = 12.1, 6.8 Hz, 2H), 1.85 – 1.73 (m, 2H), 1.50 (dd, *J* = 15.3, 7.5 Hz, 2H), 1.34 – 1.21 (m, 10H), 0.88 (t, *J* = 6.6 Hz, 3H). <sup>19</sup>F NMR (376 MHz, CDCl<sub>3</sub>) δ -152.46 (dd, *J* = 19.7, 16.6 Hz), -158.86 – -159.84 (m), -160.66 (t, *J* = 20.1 Hz), -161.48 – -162.65 (m). <sup>13</sup>C NMR (101 MHz, CDCl<sub>3</sub>) δ 165.3, 148.8, 134.1, 129.3, 115.0, 111.2, 105.8, 43.0, 31.9, 29.6, 29.4, 29.3, 29.0, 27.2, 22.7, 14.1. HRMS-ESI (*m/z*): calcd for C<sub>22</sub>H<sub>25</sub>N<sub>2</sub>OF<sub>4</sub>, [*M*+*H*]: 409.1903; found, 409.1907.

*N*-decyl-2-(perfluorobenzo[*d*]oxazol-2-yl)aniline (**4i**)

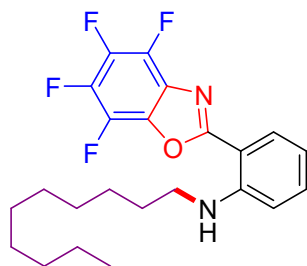

The representative **general procedure 2** mentioned above was followed. The title compound was obtained as a white solid, 46% yield. MP: 74 - 76 °C. <sup>1</sup>H NMR (400 MHz, CDCl<sub>3</sub>) δ 8.06 (dd, *J* = 7.9, 1.4 Hz, 2H), 7.40 (t, *J* = 7.2 Hz, 1H), 6.80 (d, *J* = 8.6 Hz, 1H), 6.72 (t, *J* = 7.5 Hz, 1H), 3.32 (dd, *J* = 12.1, 6.9 Hz, 2H), 1.84 – 1.73 (m, 2H), 1.55 – 1.45 (m, 2H), 1.28 (d, *J* = 11.8 Hz, 12H), 0.88 (t, *J* = 6.8 Hz, 3H). <sup>19</sup>F NMR (376 MHz, CDCl<sub>3</sub>) δ -152.42 (dd, *J* = 19.9, 16.6 Hz), -158.38 – -159.94 (m), -160.63 (t, *J* = 20.1 Hz), -162.35 (t, *J* = 20.0 Hz). <sup>13</sup>C NMR (101 MHz, CDCl<sub>3</sub>) δ 165.3, 148.8, 134.1, 129.3, 115.0, 111.2, 105.8, 43.0, 31.9, 29.6, 29.6, 29.4, 29.3, 29.0, 27.2, 22.7, 14.1. HRMS-ESI (*m/z*): calcd for C<sub>23</sub>H<sub>27</sub>N<sub>2</sub>OF<sub>4</sub>, [*M*+*H*]: 423.2060; found, 423.2060.

*N*-dodecyl-2-(perfluorobenzo[*d*]oxazol-2-yl)aniline (**4j**)

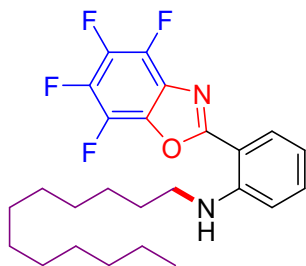

The representative **general procedure 2** mentioned above was followed. The title compound was obtained as a white solid, 47% yield. MP: 77 - 78 °C.  $^1\text{H}$  NMR (400 MHz,  $\text{CDCl}_3$ )  $\delta$  8.08 (d,  $J = 7.2$  Hz, 2H), 7.42 (t,  $J = 7.7$  Hz, 1H), 6.82 (d,  $J = 8.5$  Hz, 1H), 6.74 (t,  $J = 7.4$  Hz, 1H), 3.35 (d,  $J = 5.7$  Hz, 2H), 1.85 – 1.80 (m, 2H), 1.54 – 1.50 (m, 2H), 1.29 (s, 16H), 0.90 (d,  $J = 6.6$  Hz, 3H).  $^{19}\text{F}$  NMR (376 MHz,  $\text{CDCl}_3$ )  $\delta$  -152.00 – -153.21 (m), -159.13 – -159.68 (m), -160.68 (t,  $J = 20.1$  Hz), -162.38 (t,  $J = 19.9$  Hz).  $^{13}\text{C}$  NMR (101 MHz,  $\text{CDCl}_3$ )  $\delta$  165.3, 148.8, 134.1, 129.3, 115.0, 111.3, 105.9, 43.0, 31.9, 29.7, 29.6, 29.5, 29.4, 29.3, 29.1, 27.2, 22.7, 14.1. One carbon was lost due to overlap. HRMS-ESI ( $m/z$ ): calcd for  $\text{C}_{25}\text{H}_{31}\text{N}_2\text{OF}_4$ ,  $[\text{M}+\text{H}]$ : 451.2373; found, 451.2371.

*N*-hexadecyl-2-(perfluorobenzo[*d*]oxazol-2-yl)aniline (**4k**)

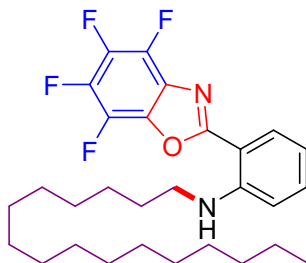

The representative **general procedure 2** mentioned above was followed. The title compound was obtained as a white solid, 50% yield. MP: 66 - 68 °C.  $^1\text{H}$  NMR (400 MHz,  $\text{CDCl}_3$ )  $\delta$  8.08 (d,  $J = 7.5$  Hz, 2H), 7.42 (t,  $J = 7.5$  Hz, 1H), 6.82 (d,  $J = 8.5$  Hz, 1H), 6.75 (t,  $J = 7.4$  Hz, 1H), 3.35 (dd,  $J = 11.6, 5.9$  Hz, 2H), 1.85 – 1.78 (m, 2H), 1.62 – 1.47 (m, 6H), 1.28 (s, 20H), 0.90 (t,  $J = 6.1$  Hz, 3H).  $^{19}\text{F}$  NMR (376 MHz,  $\text{CDCl}_3$ )  $\delta$  -151.73 – -152.77 (m), -159.04 – -159.79 (m), -160.68 (t,  $J = 20.1$  Hz), -162.37 (t,  $J = 19.9$  Hz).  $^{13}\text{C}$  NMR (101 MHz,  $\text{CDCl}_3$ )  $\delta$  165.3, 148.8, 134.1, 129.3, 115.0, 111.2, 105.8, 43.0, 32.2, 31.9, 29.8, 29.7, 29.6, 29.5, 29.4, 29.3, 29.2, 29.1, 29.0, 28.9, 27.2, 22.7, 14.1. HRMS-ESI ( $m/z$ ): calcd for  $\text{C}_{29}\text{H}_{39}\text{N}_2\text{OF}_4$ ,  $[\text{M}+\text{H}]$ : 507.2999; found, 507.2996.

*N*-octadecyl-2-(perfluorobenzo[*d*]oxazol-2-yl)aniline (**4l**)

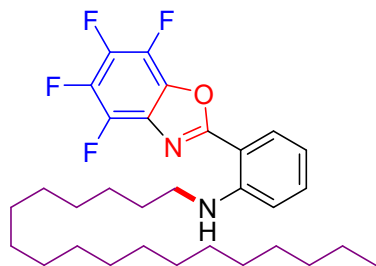

The representative **general procedure 2** mentioned above was followed. The title compound was obtained as a white solid, 47% yield. MP: 66 - 68 °C. <sup>1</sup>H NMR (400 MHz, CDCl<sub>3</sub>) δ 8.05 (d, *J* = 6.8 Hz, 2H), 7.40 (t, *J* = 7.4 Hz, 1H), 6.79 (d, *J* = 8.4 Hz, 1H), 6.72 (t, *J* = 6.9 Hz, 1H), 3.32 (d, *J* = 4.8 Hz, 2H), 2.50 (t, *J* = 6.8 Hz, 1H), 1.78 (d, *J* = 6.7 Hz, 2H), 1.53 (d, *J* = 15.6 Hz, 3H), 1.25 (s, 26H), 0.87 (d, *J* = 6.0 Hz, 3H). <sup>19</sup>F NMR (376 MHz, CDCl<sub>3</sub>) δ -151.84 – -153.17 (m), -158.88 – -159.72 (m), -160.66 (t, *J* = 20.1 Hz), -162.36 (t, *J* = 19.9 Hz). <sup>13</sup>C NMR (101 MHz, CDCl<sub>3</sub>) δ 165.3, 148.8, 134.1, 129.3, 115.0, 111.3, 105.8, 43.0, 32.2, 31.9, 29.9, 29.8, 29.7, 29.6, 29.5, 29.4, 29.3, 29.2, 29.1, 29.0, 28.9, 27.2, 22.7, 14.1. One carbon was lost due to overlap. HRMS-ESI (*m/z*): calcd for C<sub>31</sub>H<sub>43</sub>N<sub>2</sub>OF<sub>4</sub>, [*M*+*H*]: 535.3312; found, 535.3315.

#### 4. X-ray Information of **3c** (CCDC 2076932)

Table 1 Crystal data and structure refinement for **3c**.

|                                             |                                                               |
|---------------------------------------------|---------------------------------------------------------------|
| Identification code                         | <b>3c</b>                                                     |
| Empirical formula                           | C <sub>14</sub> H <sub>7</sub> F <sub>4</sub> NO <sub>2</sub> |
| Formula weight                              | 297.21                                                        |
| Temperature/K                               | 149.99(10)                                                    |
| Crystal system                              | triclinic                                                     |
| Space group                                 | P-1                                                           |
| a/Å                                         | 5.9650(6)                                                     |
| b/Å                                         | 7.5856(11)                                                    |
| c/Å                                         | 13.5287(15)                                                   |
| $\alpha$ /°                                 | 82.212(11)                                                    |
| $\beta$ /°                                  | 82.531(9)                                                     |
| $\gamma$ /°                                 | 88.960(10)                                                    |
| Volume/Å <sup>3</sup>                       | 601.36(13)                                                    |
| Z                                           | 2                                                             |
| $\rho_{\text{calc}}$ /cm <sup>3</sup>       | 1.641                                                         |
| $\mu$ /mm <sup>-1</sup>                     | 0.152                                                         |
| F(000)                                      | 300.0                                                         |
| Crystal size/mm <sup>3</sup>                | 0.14 × 0.12 × 0.11                                            |
| Radiation                                   | Mo K $\alpha$ ( $\lambda$ = 0.71073)                          |
| 2 $\theta$ range for data collection/       | 5.42 to 49.994                                                |
| Index ranges                                | -4 ≤ h ≤ 7, -9 ≤ k ≤ 8, -15 ≤ l ≤ 16                          |
| Reflections collected                       | 3832                                                          |
| Independent reflections                     | 2113 [R <sub>int</sub> = 0.0219, R <sub>sigma</sub> = 0.0424] |
| Data/restraints/parameters                  | 2113/7/191                                                    |
| Goodness-of-fit on F <sup>2</sup>           | 1.079                                                         |
| Final R indexes [I ≥ 2 $\sigma$ (I)]        | R <sub>1</sub> = 0.0417, wR <sub>2</sub> = 0.0957             |
| Final R indexes [all data]                  | R <sub>1</sub> = 0.0586, wR <sub>2</sub> = 0.1060             |
| Largest diff. peak/hole / e Å <sup>-3</sup> | 0.16/-0.22                                                    |

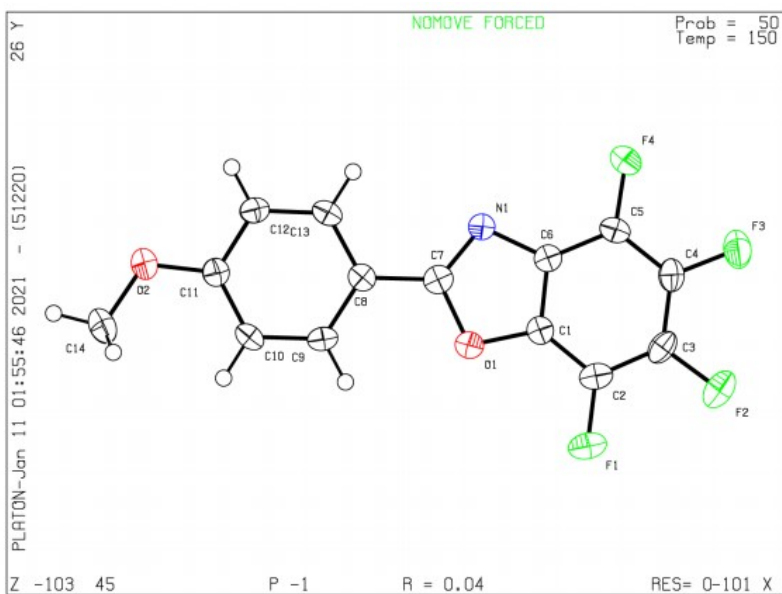

**Figure S1.** The Ellipsoid Contour % Probability Levels of **3c** is 50%

## 5. Fluorescence Spectra of Solvents Screening, Absorption of 3a – 3u,

### 4a – 4l

#### 5.1 The fluorescence emission spectra of solvents screening 3d

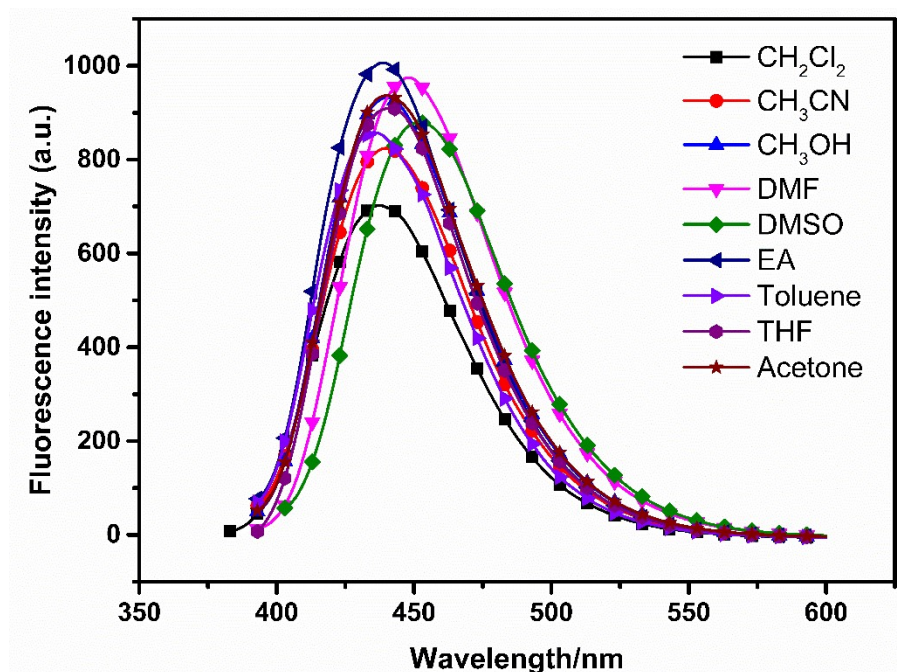

**Figure S2** The Fluorescence Emission Spectra of **3d** in  $\text{CH}_2\text{Cl}_2$ ,  $\text{CH}_3\text{CN}$ ,  $\text{CH}_3\text{OH}$ , DMF, DMSO, EA, Toluene, THF and Acetone at a concentration  $12.5 \mu\text{mol/L}$ .

Compound **3d** were chosen as the sample to screen solvents, such as  $\text{CH}_2\text{Cl}_2$ ,  $\text{CH}_3\text{CN}$ ,  $\text{CH}_3\text{OH}$ , DMF, DMSO, EA, Toluene, THF and Acetone in  $12.5 \mu\text{mol/L}$ . We found that EA is the best solvent for fluorescence emission. The data of the fluorescence emission was tested by HITACHI F7000 at room temperature.

## 5.2 Absorption of 3a – 3u, 4a – 4l

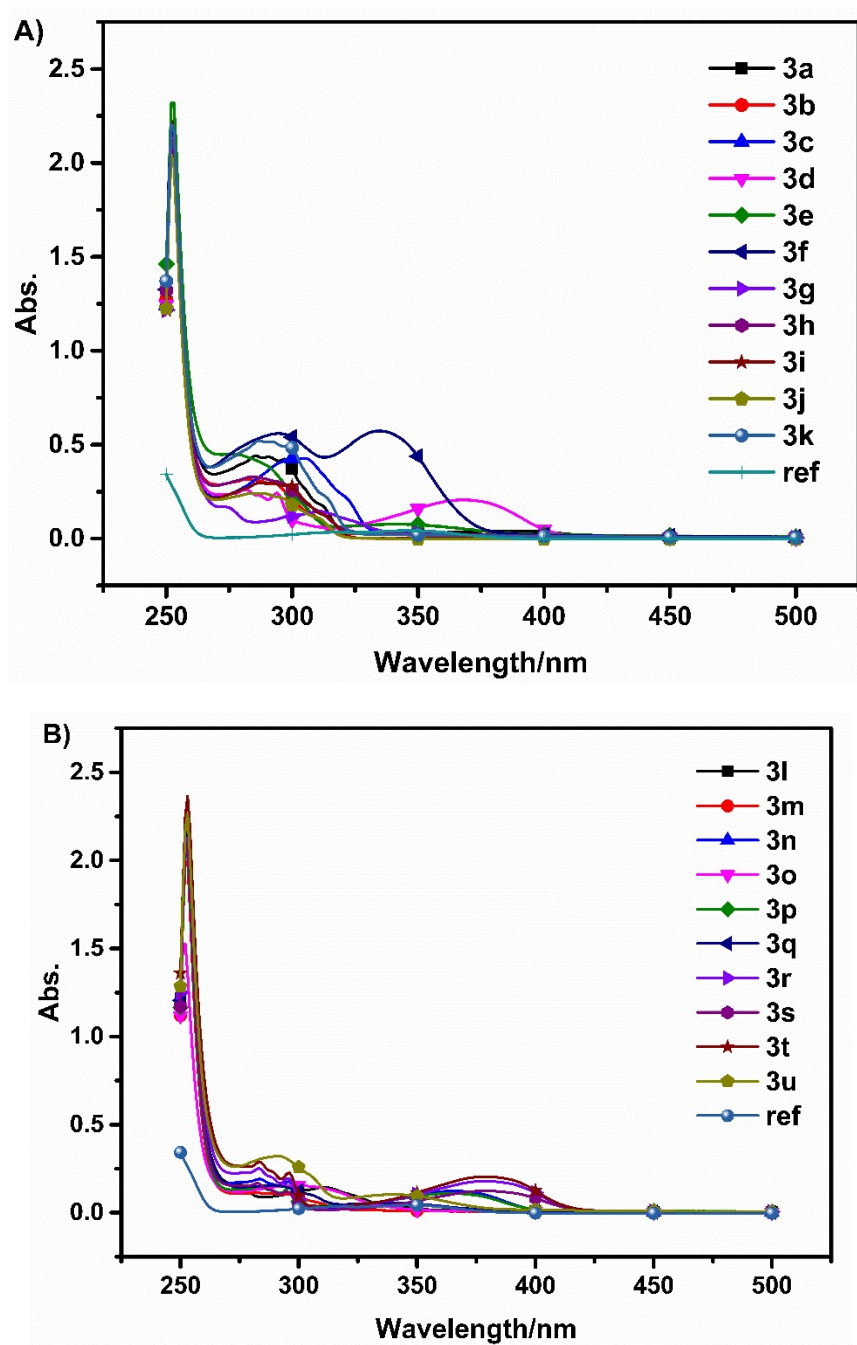

**Figure S3.** The UV Absorption Spectra of **3a** – **3u** (12.5  $\mu\text{mol/L}$  solution in EA)

The data was tested by SHIMADZU UV 2000 at room temperature.

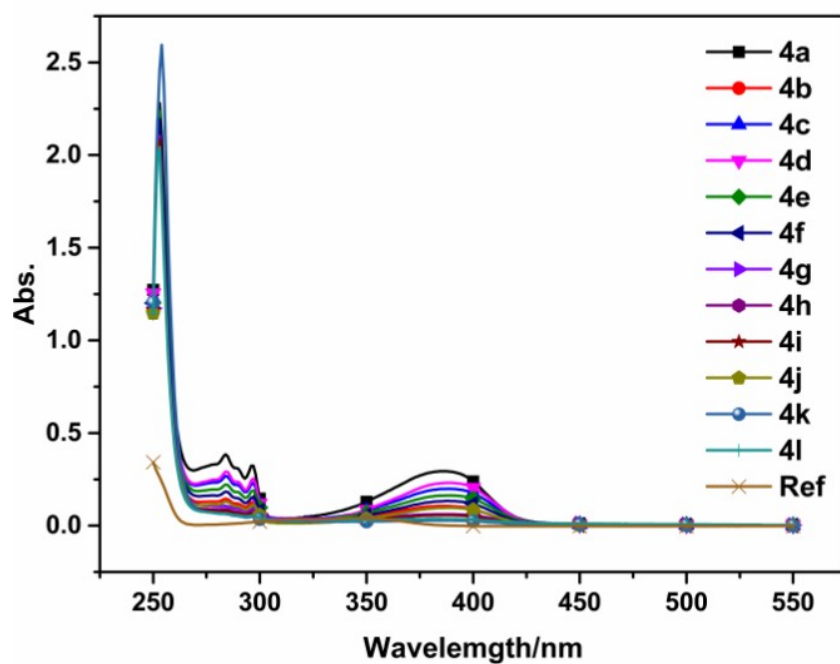

**Figure S4.** The UV Absorption Spectra of **4a** – **4l** (12.5  $\mu\text{mol/L}$  solution in EA)  
The data was tested by SHIMADZU UV 2000 at room temperature.

### 5.3 The Fluorescence Emission Spectra of 3a – 3u, 4a – 4l

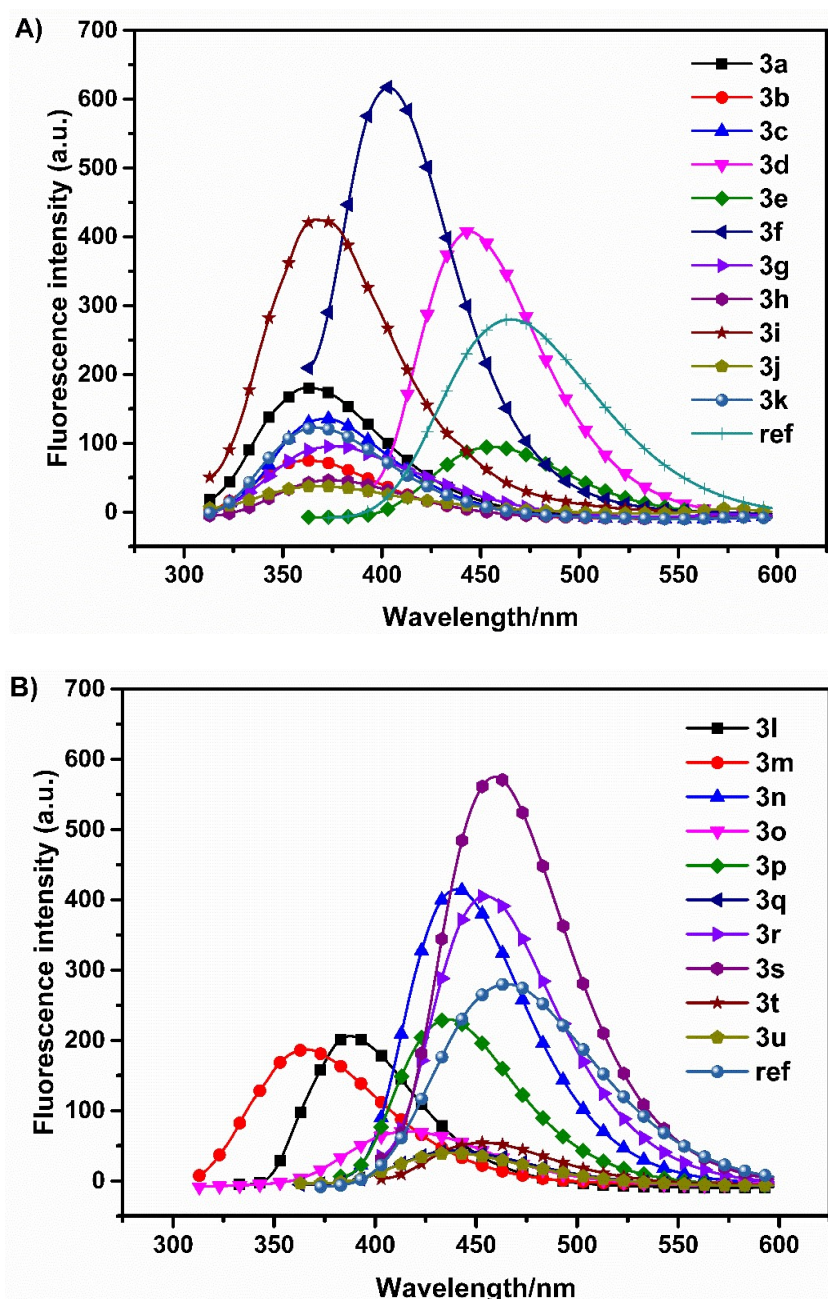

**Figure S5.** The Fluorescence Emission Spectra of 3a – 3u

We controlled the UV absorbance of 3a – 3u between 0.025 and 0.050 in EA for fluorescence quantum yield by SHIMADZU UV 2000 at room temperature. Next, we tested the data of fluorescence emission when excited at their maximum absorption wavelength by HITACHI F7000.

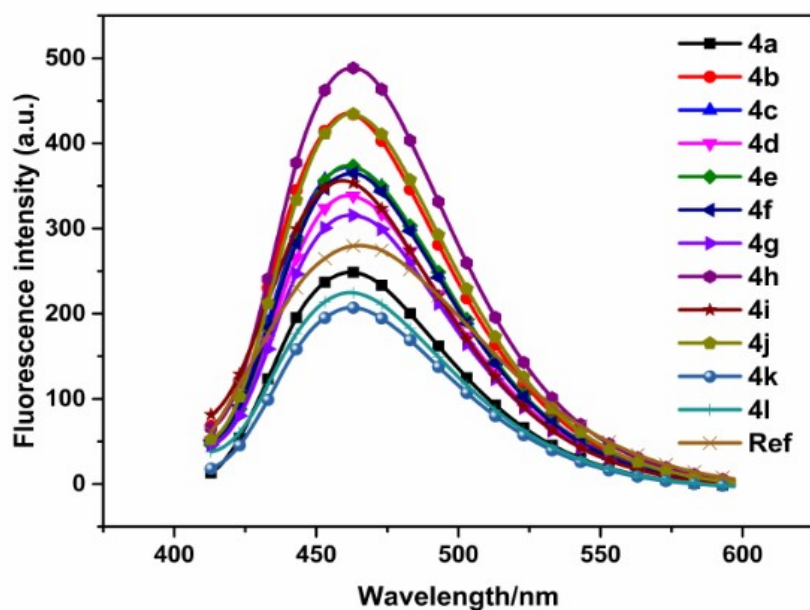

**Figure S6.** The Fluorescence Emission Spectra of **4a** – **4l**

We controlled the UV absorbance of **4a** – **4l** between 0.025 and 0.050 in EA for fluorescence quantum yield by SHIMADZU UV 2000 at room temperature. Next, we tested the data of fluorescence emission when excited at their maximum absorption wavelength by HITACHI F7000.

## 6. Optical data table 3a – 3u, 4a – 4l

### 6.1 The measured photophysical properties of 3a – 3u

**Table S2.** the Measured Photophysical Properties of **3a – 3u**

| Compound   | Abs.  | $\lambda_{\text{max}}(\text{nm})$ | Emission(nm) | Fluorescent Area | $\Phi_{\text{F}}(\%)$ |
|------------|-------|-----------------------------------|--------------|------------------|-----------------------|
| <b>3a</b>  | 0.044 | 286                               | 362          | 13307.92         | 29                    |
| <b>3b</b>  | 0.048 | 281                               | 362          | 5046.75          | 10                    |
| <b>3c</b>  | 0.032 | 296                               | 372          | 8618.78          | 26                    |
| <b>3d</b>  | 0.03  | 370                               | 444          | 30650.11         | 99                    |
| <b>3e</b>  | 0.041 | 343                               | 456          | 7078.79          | 17                    |
| <b>3f</b>  | 0.052 | 334                               | 403          | 44735.56         | 83                    |
| <b>3g</b>  | 0.048 | 283                               | 375          | 8262.31          | 17                    |
| <b>3h</b>  | 0.053 | 284                               | 374          | 2937.43          | 5                     |
| <b>3i</b>  | 0.043 | 287                               | 366          | 35258.74         | 79                    |
| <b>3j</b>  | 0.049 | 284                               | 366          | 3335.17          | 7                     |
| <b>3k</b>  | 0.046 | 287                               | 367          | 8822.08          | 19                    |
| <b>3l</b>  | 0.043 | 310                               | 388          | 12359.34         | 28                    |
| <b>3m</b>  | 0.051 | 283                               | 367          | 14558.67         | 28                    |
| <b>3n</b>  | 0.049 | 363                               | 440          | 30482.20         | 60                    |
| <b>3o</b>  | 0.05  | 293                               | 415          | 4962.12          | 10                    |
| <b>3p</b>  | 0.037 | 363                               | 436          | 16217.65         | 42                    |
| <b>3q</b>  | 0.051 | 338                               | 440          | 2615.98          | 5                     |
| <b>3r</b>  | 0.05  | 377                               | 454          | 31092.74         | 60                    |
| <b>3s</b>  | 0.047 | 379                               | 459          | 45030.85         | 93                    |
| <b>3t</b>  | 0.049 | 378                               | 453          | 3544.35          | 7                     |
| <b>3u</b>  | 0.05  | 341                               | 438          | 2358.99          | 5                     |
| <b>Ref</b> | 0.044 | 345                               | 465          | 26380.63         | 54.6                  |

## 6.2 The measured photophysical properties of 4a – 4l

**Table S3.** the Measured Photophysical Properties of **4a – 4l**

| Compound   | Abs.  | $\lambda_{\max}$ (nm) | Emission(nm) | Fluorescent Area | $\Phi_F$ (%) |
|------------|-------|-----------------------|--------------|------------------|--------------|
| <b>4a</b>  | 0.042 | 378                   | 462          | 18608.72         | 43           |
| <b>4b</b>  | 0.05  | 384                   | 461          | 33349.11         | 64           |
| <b>4c</b>  | 0.048 | 385                   | 462          | 28689.65         | 58           |
| <b>4d</b>  | 0.044 | 385                   | 462          | 25895.9          | 57           |
| <b>4e</b>  | 0.045 | 384                   | 461          | 28489.16         | 61           |
| <b>4f</b>  | 0.051 | 384                   | 462          | 27997.76         | 53           |
| <b>4g</b>  | 0.047 | 385                   | 462          | 24382.84         | 50           |
| <b>4h</b>  | 0.054 | 389                   | 462          | 38035.11         | 68           |
| <b>4i</b>  | 0.047 | 384                   | 459          | 27571.52         | 57           |
| <b>4j</b>  | 0.043 | 389                   | 462          | 33518.23         | 75           |
| <b>4k</b>  | 0.03  | 380                   | 462          | 15657.16         | 50           |
| <b>4l</b>  | 0.033 | 384                   | 462          | 17239.47         | 50           |
| <b>Ref</b> | 0.044 | 345                   | 465          | 26380.63         | 54.6         |

The calculation formula of quantum yield as follows:

$$\Phi_s = \frac{F_s A_r n_s^2}{F_r A_s n_r^2} \Phi_r$$

In formula, s and r represent sample and reference respectively, F is the relative integrated fluorescence intensity, A is the absorbance, and n is the refractive index of the solvent.

## **7. Preparation and characterization of platinum nanomaterials of compound **4l** and CTAB**

### **7.1 General preparation process of platinum nanomaterials of compound **4l****

Experimental process: Weigh  $\text{Pt}(\text{acac})_2$  (5.0 mg) and **4l** (26.2 mg) into a 30.0 mL reaction flask, then add 4.0 mL oleylamine, cap the bottle and sonicate it in an ultrasonic machine for 30 min until a uniform solution is formed (the ultrasonic temperature is controlled below 25 °C). After sonication is uniform, weigh 5.0 mg of tungsten hexacarbonyl into the reaction flask, tighten the cap and shake it lightly for a few times, then put it in a 165 °C oil bath for 2 h.

### **7.2 General preparation process of platinum nanomaterials of CTAB**

Experimental process: Weigh  $\text{Pt}(\text{acac})_2$  (10.0 mg) and CTAB (75.0 mg) into a 30.0 mL reaction flask, add 4.0 mL oleylamine and close the cap, then sonicate in an ultrasonic machine for 30 min until a uniform solution is formed (the ultrasonic temperature is controlled below 25 °C). After sonication is uniform, weigh 10.0 mg tungsten hexacarbonyl into the reaction flask, tighten the cap and shake it lightly for a few times, then put it in a 165 °C oil bath for 2 h.

### 7.3 Transimission Electron Microscopic (TEM) characterization of platinum nanomaterials of compound 4I and CTAB

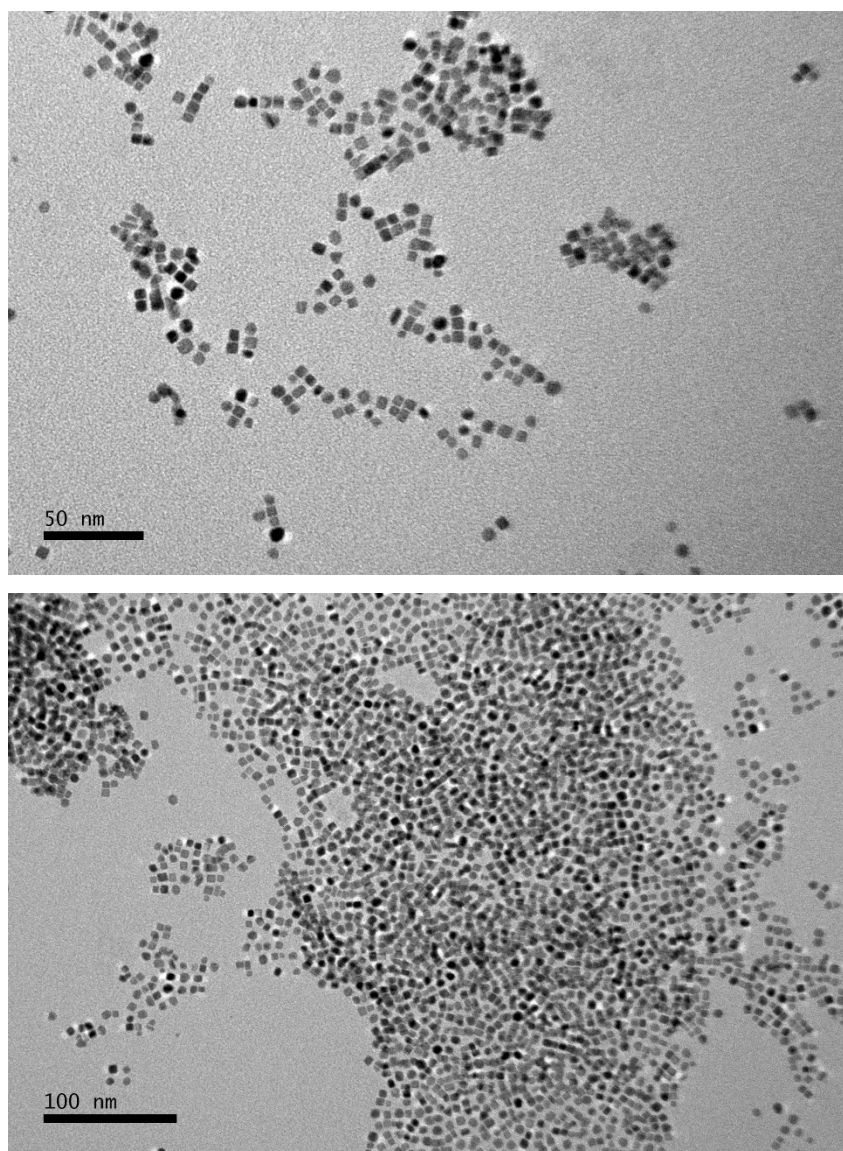

Figure S7 TEM images of uniform cubic platinum nanoparticles (**4I**)

TEM sample preparation: Take 0.3 mL of the original solution into a 1.5 mL centrifuge tube, add 0.9 mL of n-hexane, sonicate for 5 min and centrifuge at 13000 r/min for 5 min to obtain a black precipitate. After the first centrifugation, remove the supernatant with a pipette, then add hexane:ethanol (2:1), sonicate for 5 min and then centrifuge at the same speed. Perform the above operation again and disperse the sample in hexane. Next, the transmission electron microscope (TEM) test of uniform cubic platinum (**4I**) nanoparticles was carried out on the JEM-2100 Plus instrument.

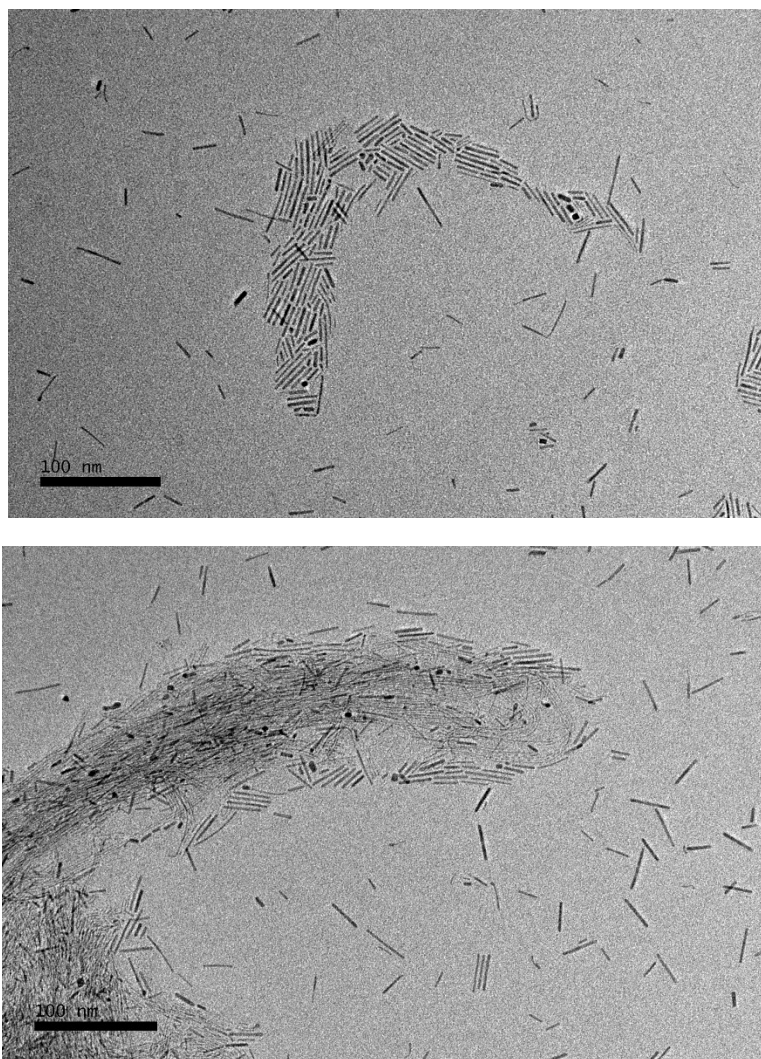

Figure S8 TEM images of platinum nanowire (CTAB)

TEM sample preparation: Take 0.3 mL of the original solution into a 1.5 mL centrifuge tube, add 0.9 mL of n-hexane, sonicate for 5 min and centrifuge at 13000 r/min for 5 min to obtain a black precipitate. After the first centrifugation, remove the supernatant with a pipette, then add hexane:ethanol (2:1), sonicate for 5 min and then centrifuge at the same speed. Perform the above operation again and disperse the sample in hexane. Next, the transmission electron microscope (TEM) test of platinum nanowires (CTAB) was carried out on the JEM-2100 Plus instrument.

## 8. $^1\text{H}$ , $^{13}\text{C}$ , $^{19}\text{F}$ NMR and HRMS spectra for the compound

4,5,6,7-tetrafluoro-2-(*p*-tolyl)benzo[*d*]oxazole (**3a**)

$^1\text{H}$  NMR (400 MHz,  $\text{CDCl}_3$ )

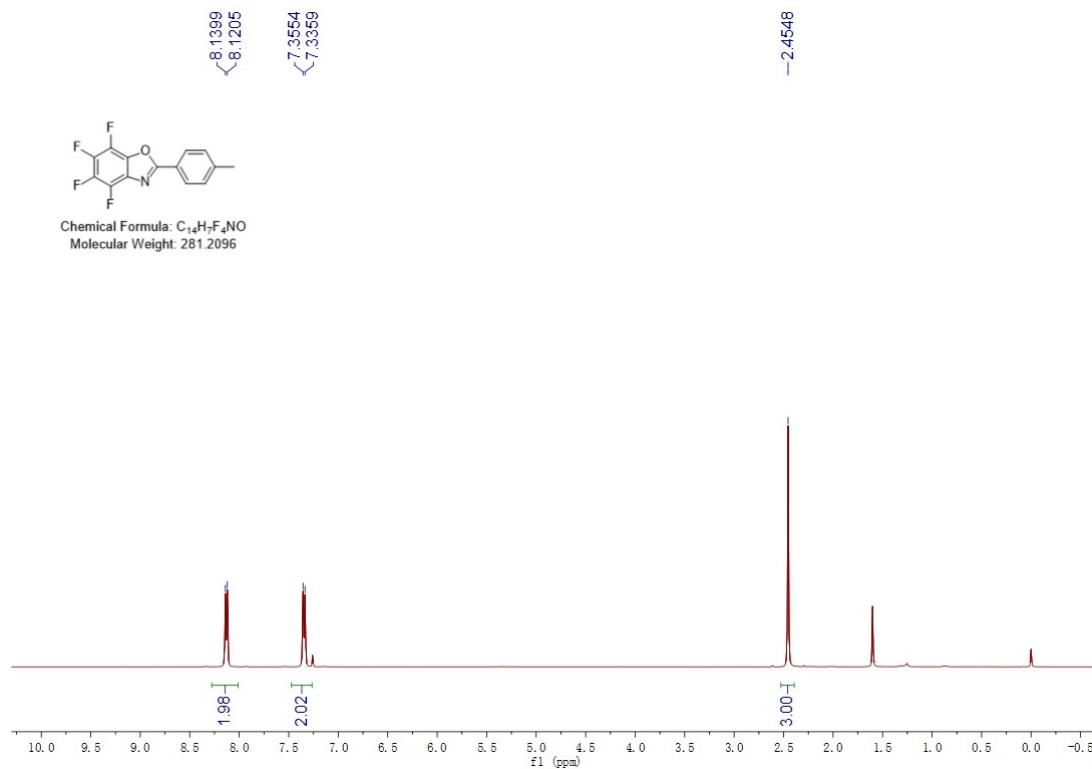

$^{13}\text{C}$  NMR (101 MHz,  $\text{CDCl}_3$ )

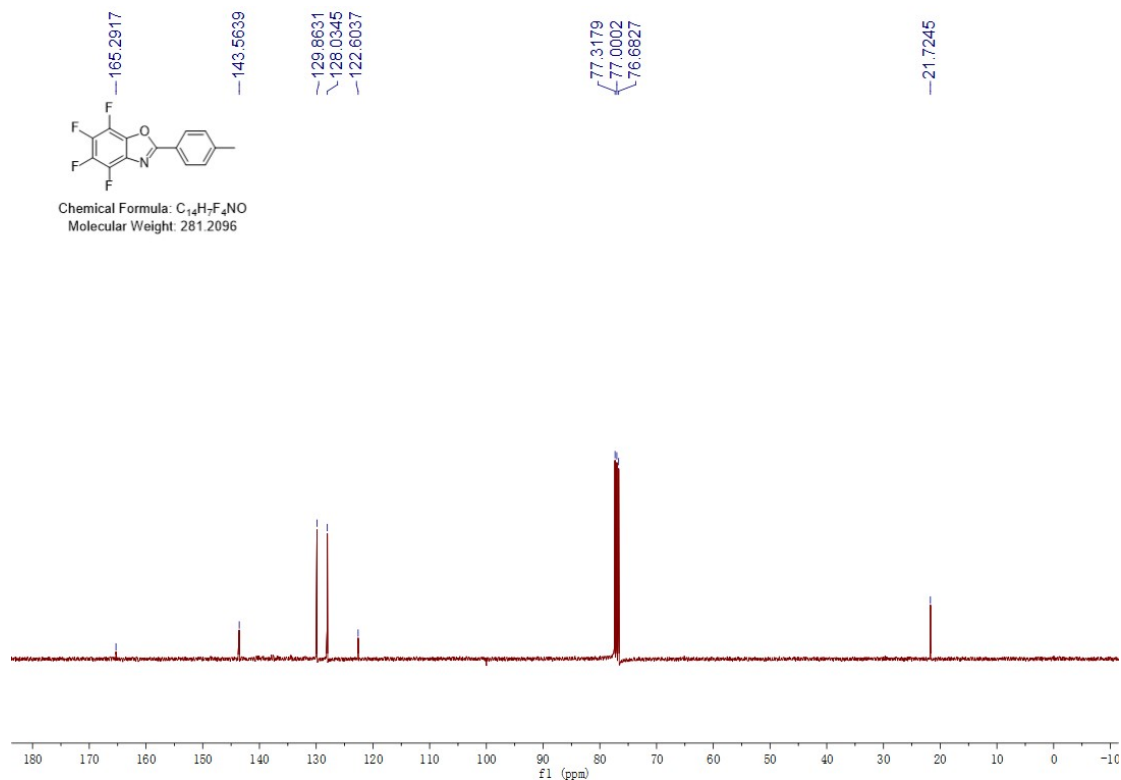

$^{19}\text{F}$  NMR (376 MHz,  $\text{CDCl}_3$ )

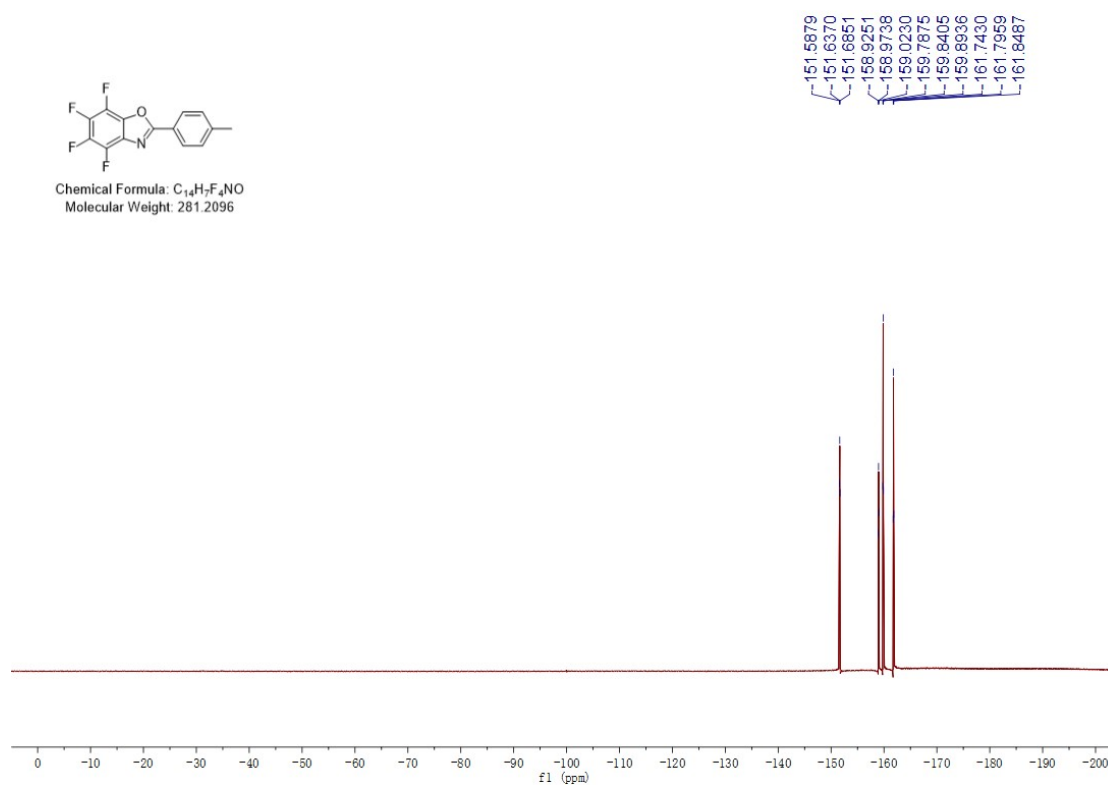

HRMS spectra

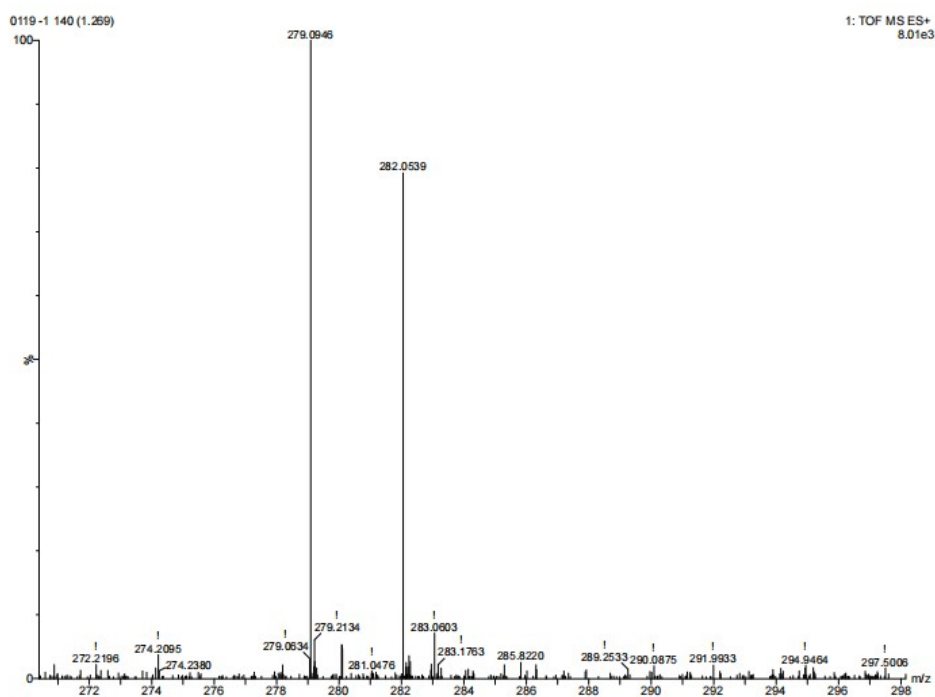

# 4,5,6,7-tetrafluoro-2-phenylbenzo[d]oxazole (**3b**)

$^1\text{H}$ NMR (400 MHz,  $\text{CDCl}_3$ )

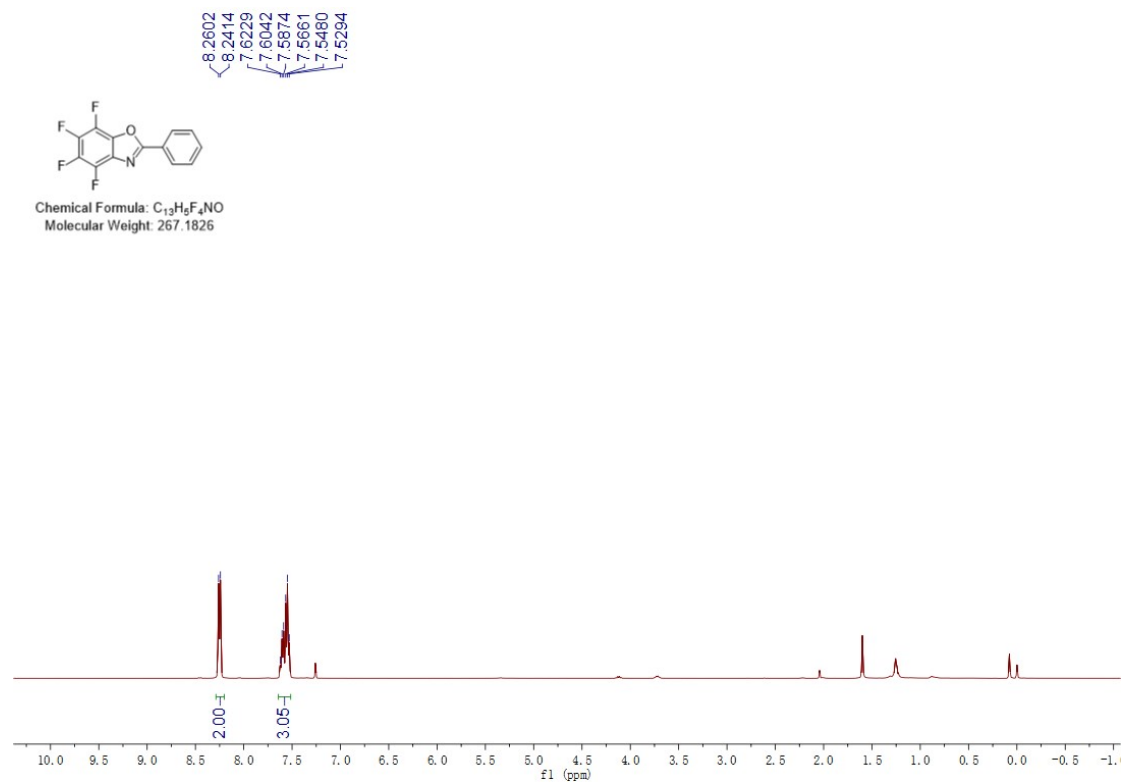

$^{13}\text{C}$  NMR (101 MHz,  $\text{CDCl}_3$ )

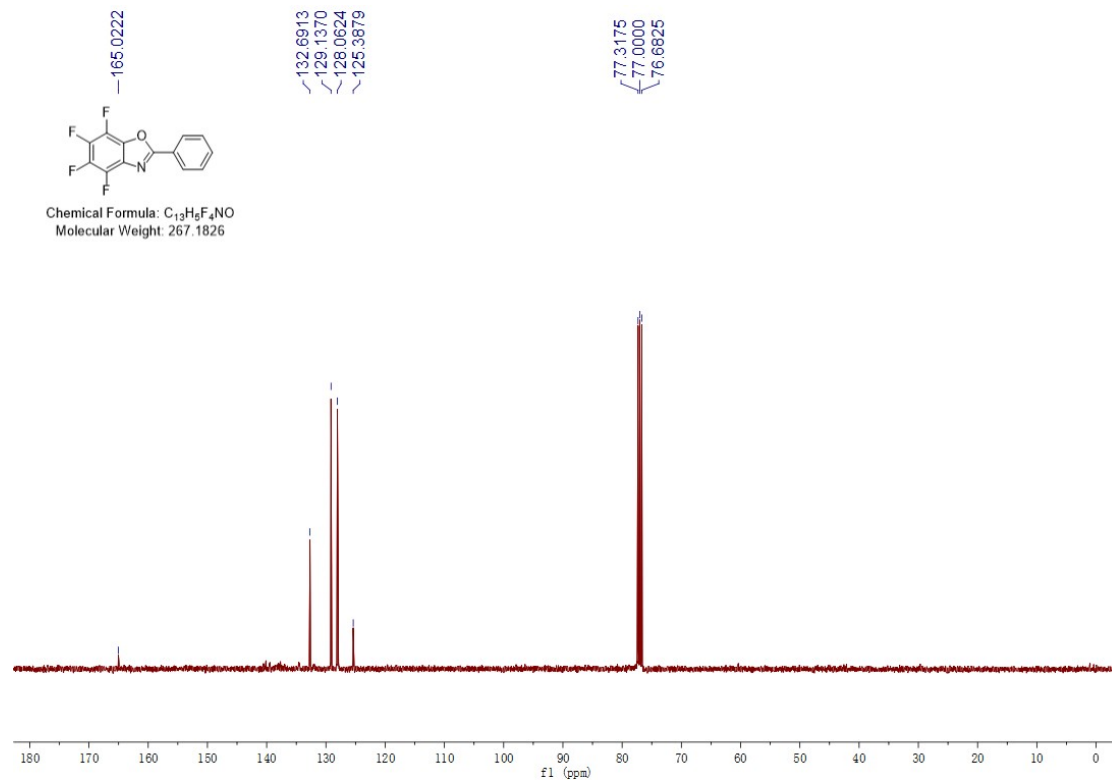

$^{19}\text{F}$  NMR (376 MHz,  $\text{CDCl}_3$ )

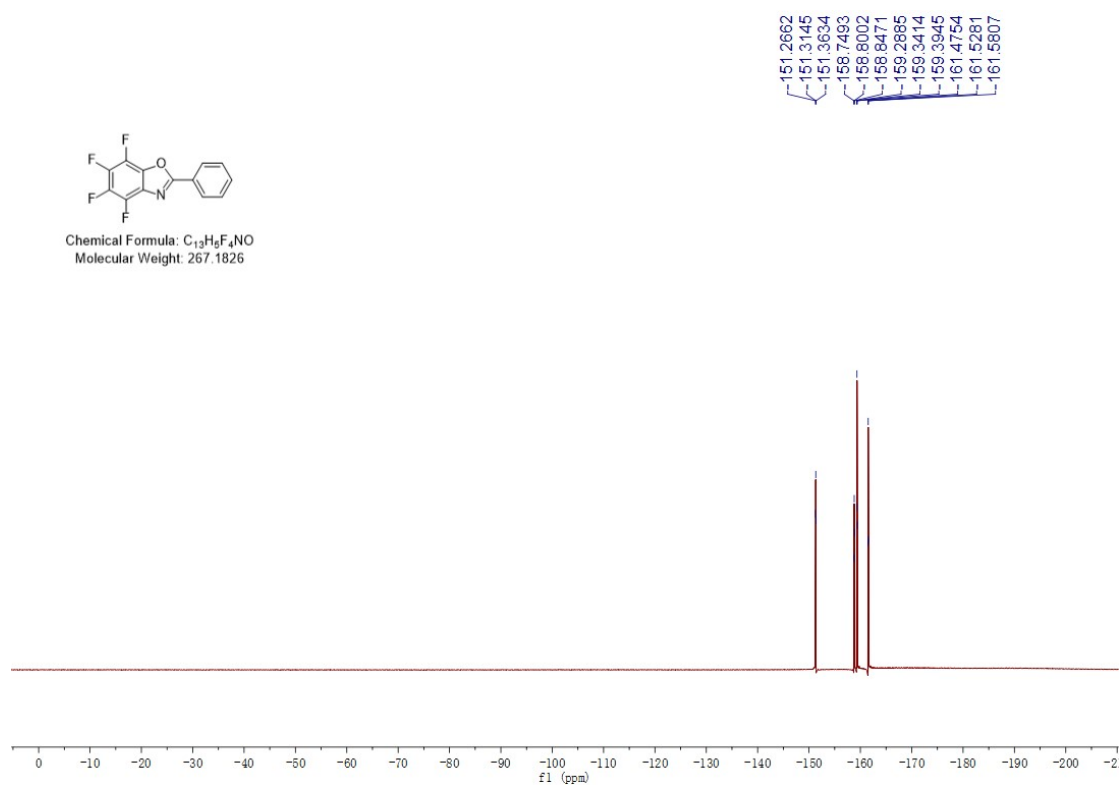

HRMS spectra

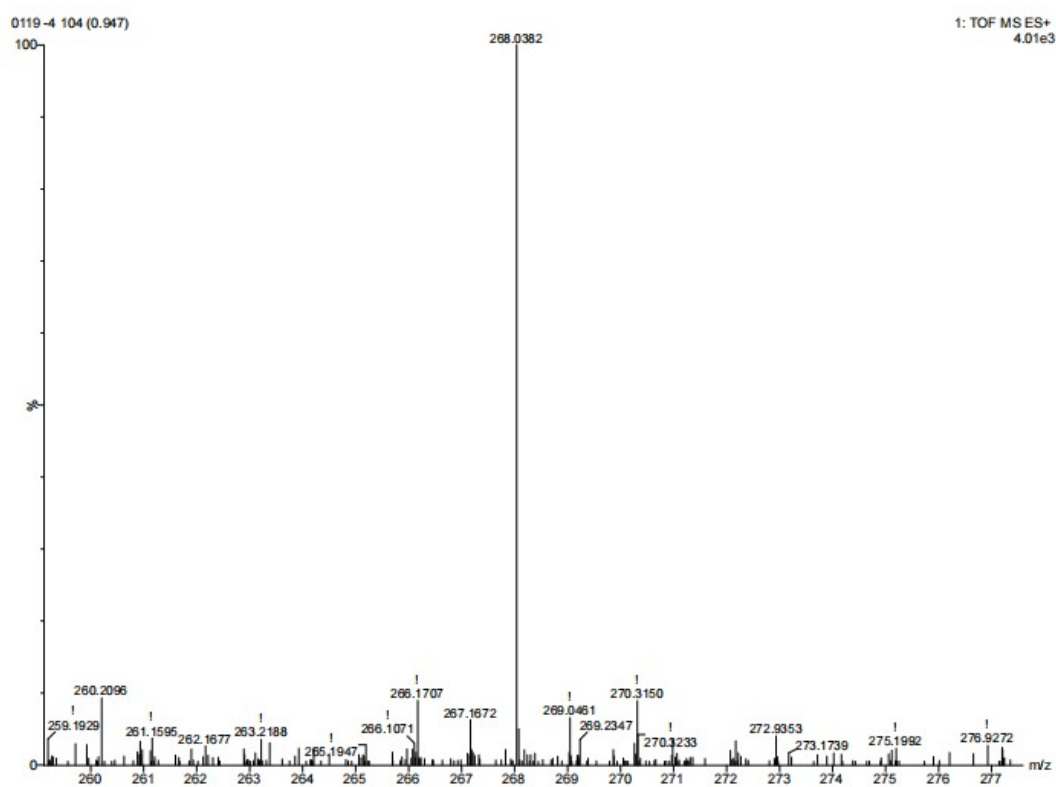

# 4,5,6,7-tetrafluoro-2-(4-methoxyphenyl)benzo[d]oxazole (**3c**)

<sup>1</sup>H NMR (400 MHz, DMSO)

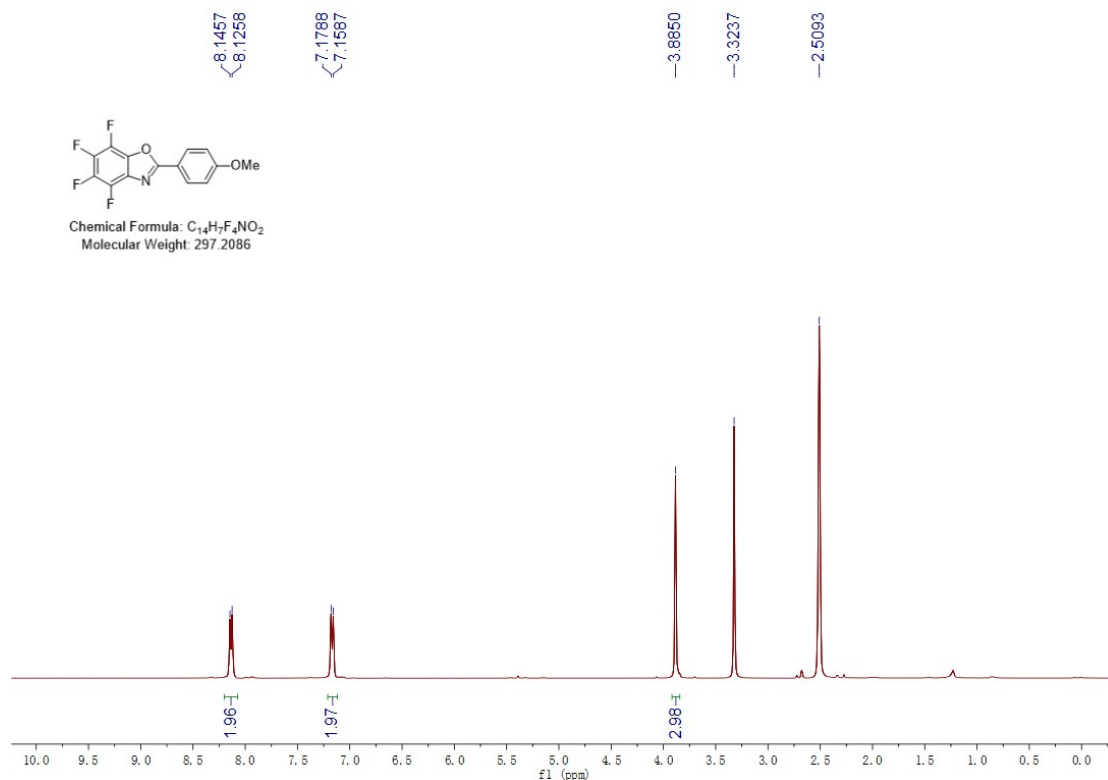

<sup>13</sup>C NMR (101 MHz, DMSO)

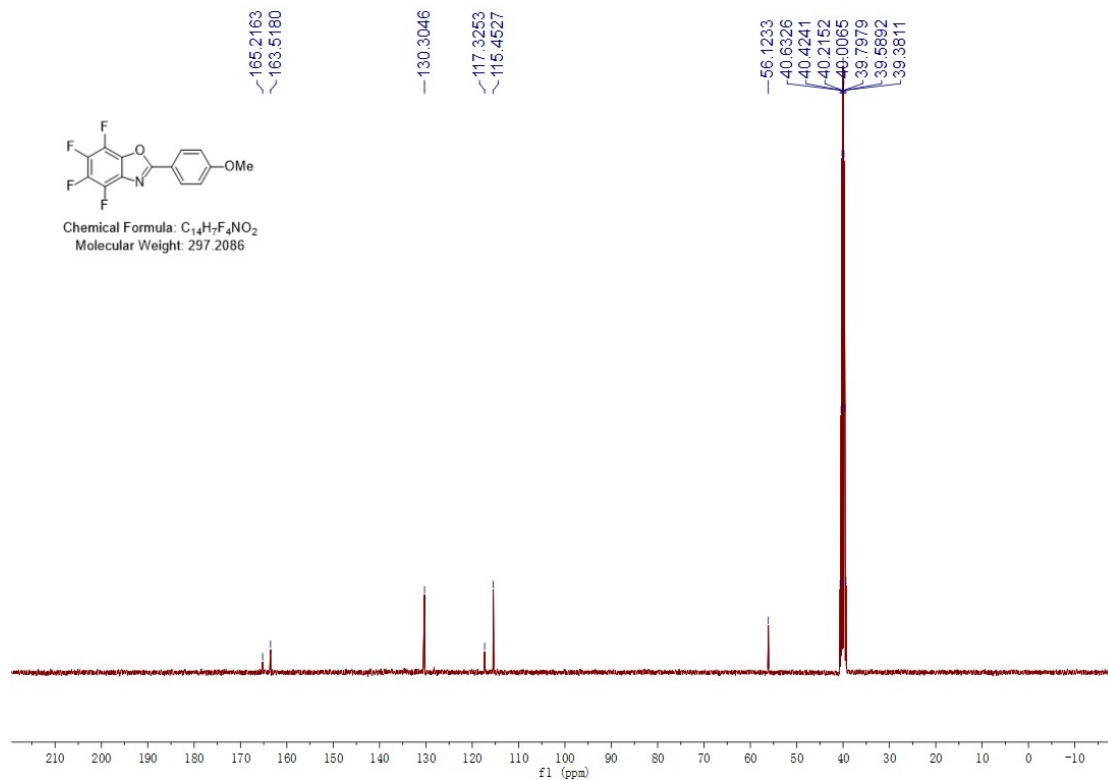

<sup>19</sup>F NMR (376 MHz, DMSO)

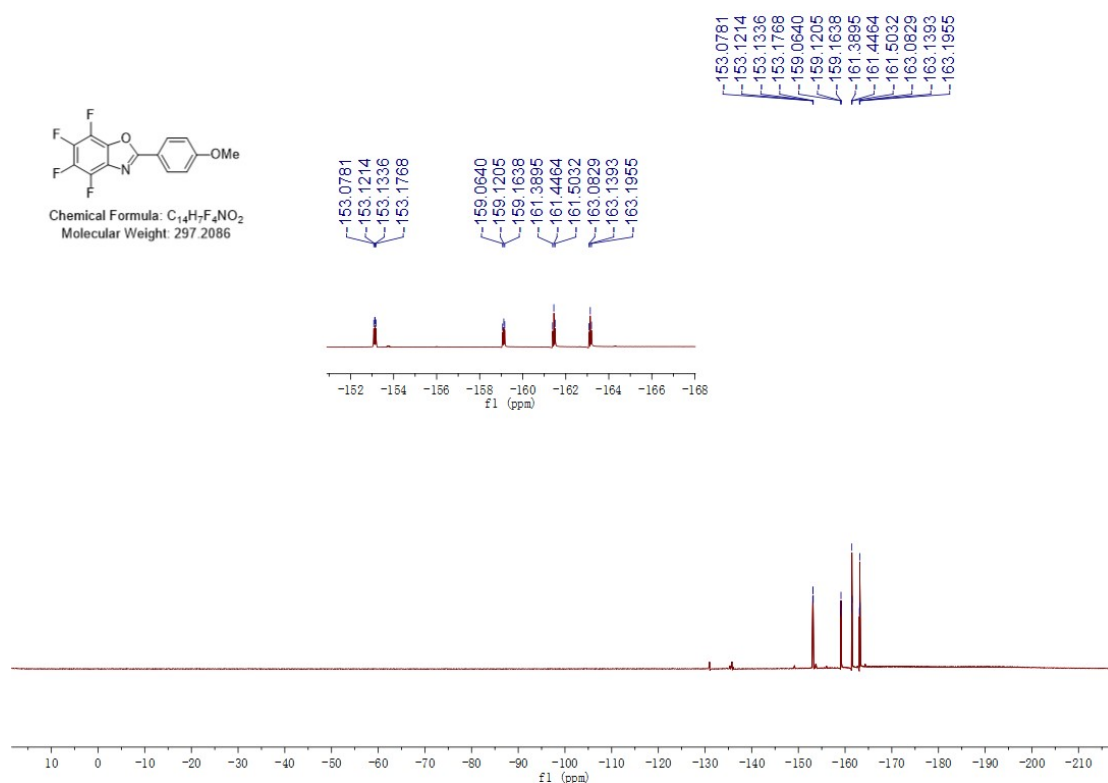

HRMS spectra

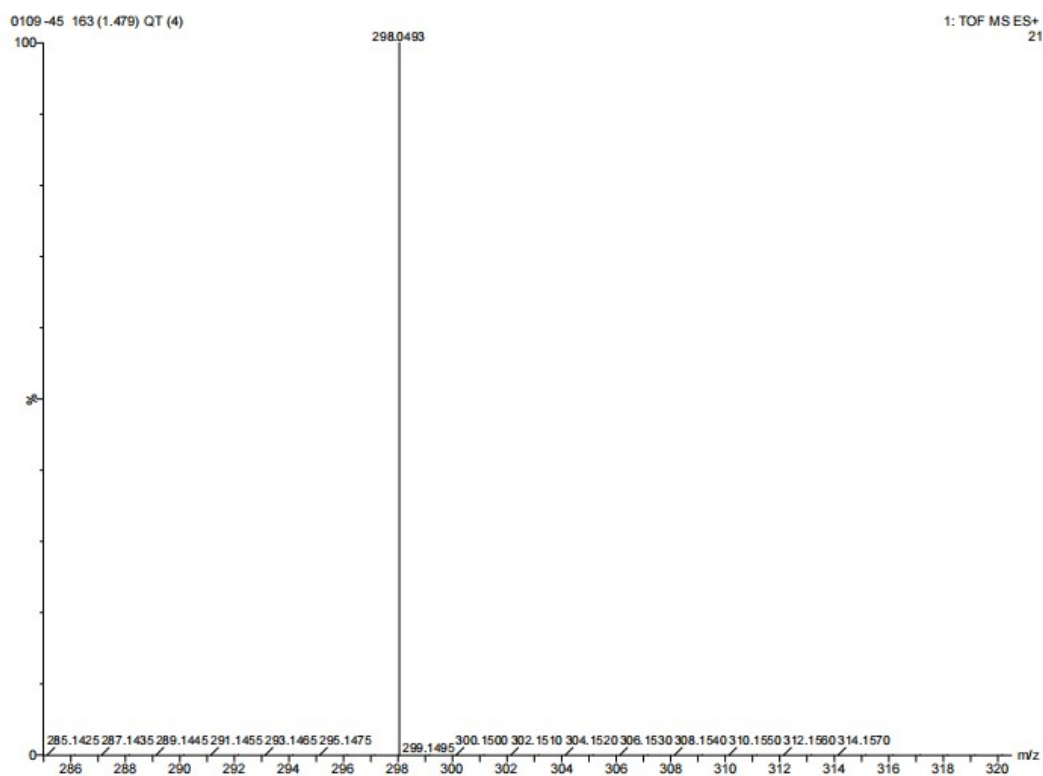

## 2-(perfluorobenzo[d]oxazol-2-yl)aniline (**3d**)

$^1\text{H}$  NMR (400 MHz, DMSO)

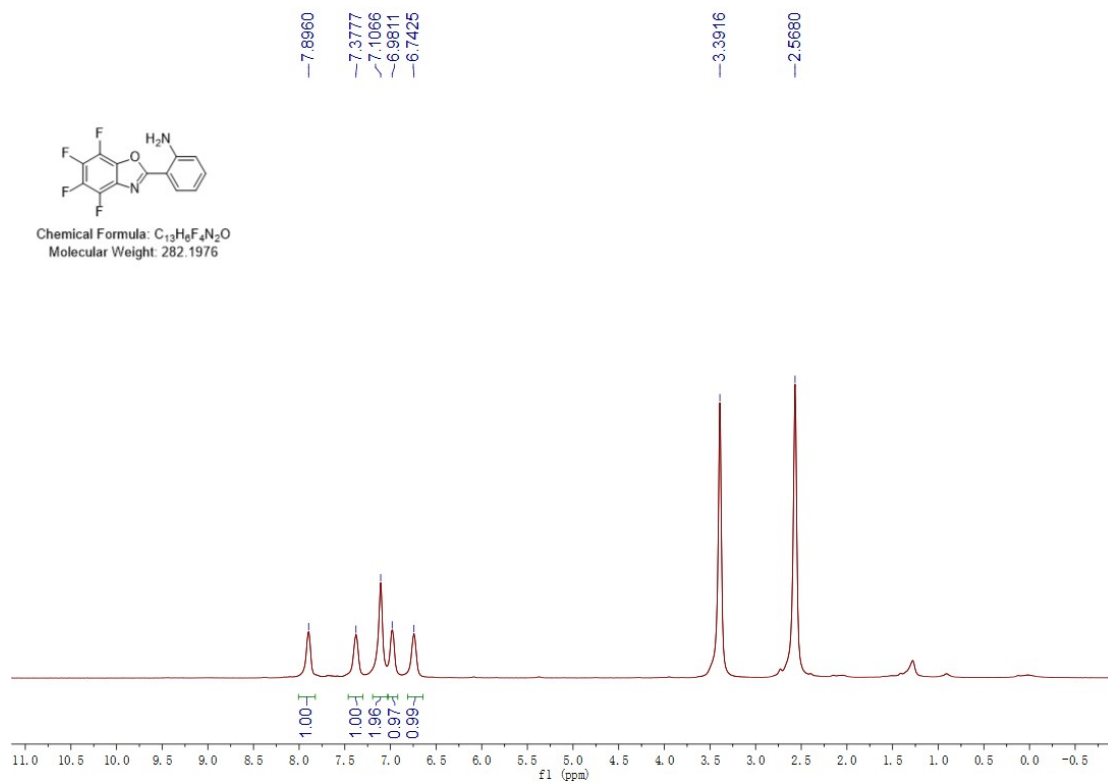

$^{13}\text{C}$  NMR (101 MHz, DMSO)

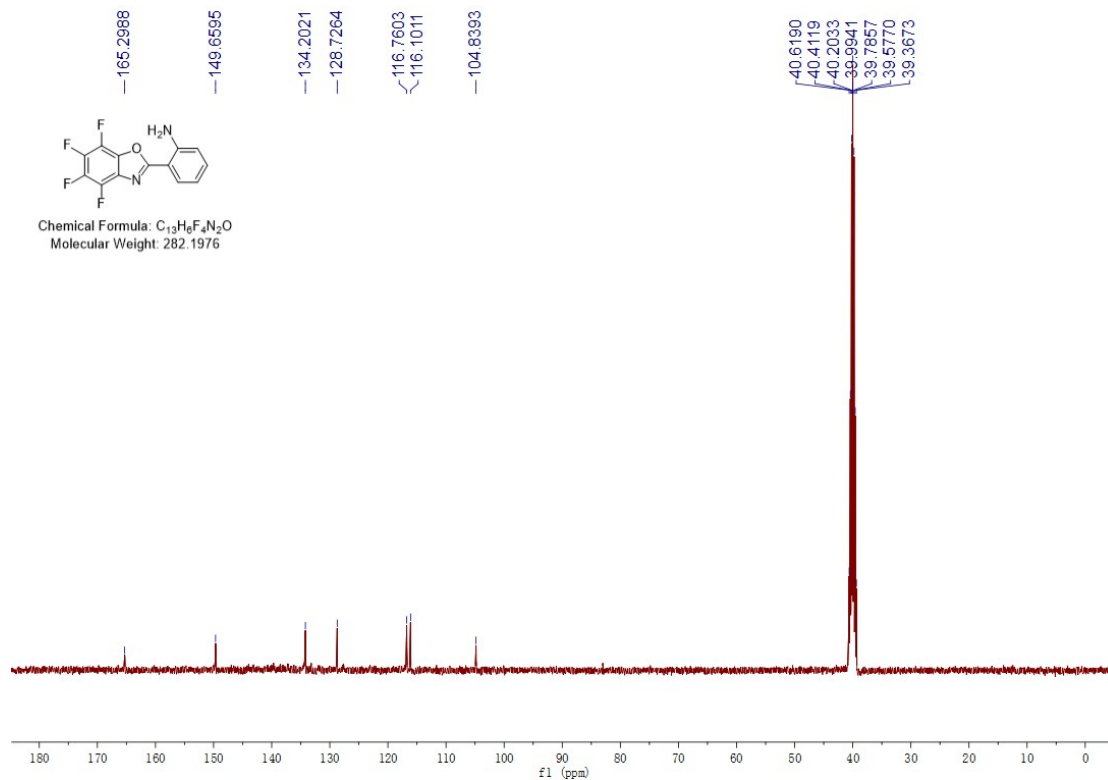

<sup>19</sup>F NMR (376 MHz, DMSO)

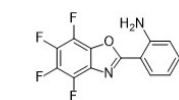

Chemical Formula: C<sub>13</sub>H<sub>6</sub>F<sub>4</sub>N<sub>2</sub>O  
Molecular Weight: 282.1976

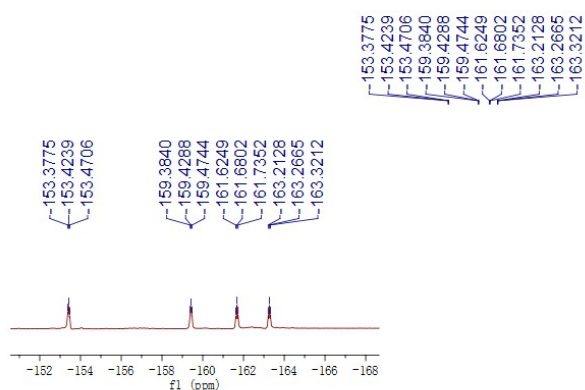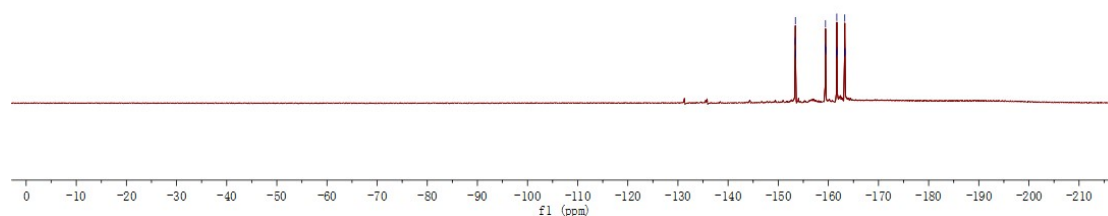

HRMS spectra

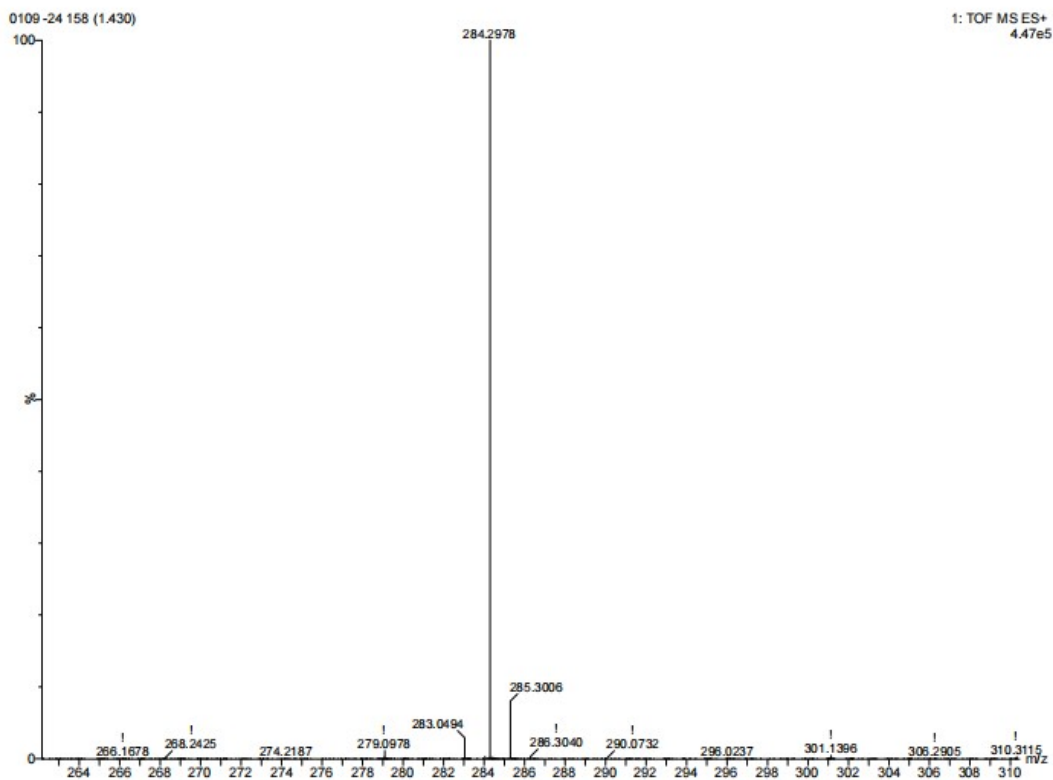

### 3-(perfluorobenzo[d]oxazol-2-yl)aniline (**3e**)

$^1\text{H}$  NMR (400 MHz, DMSO)

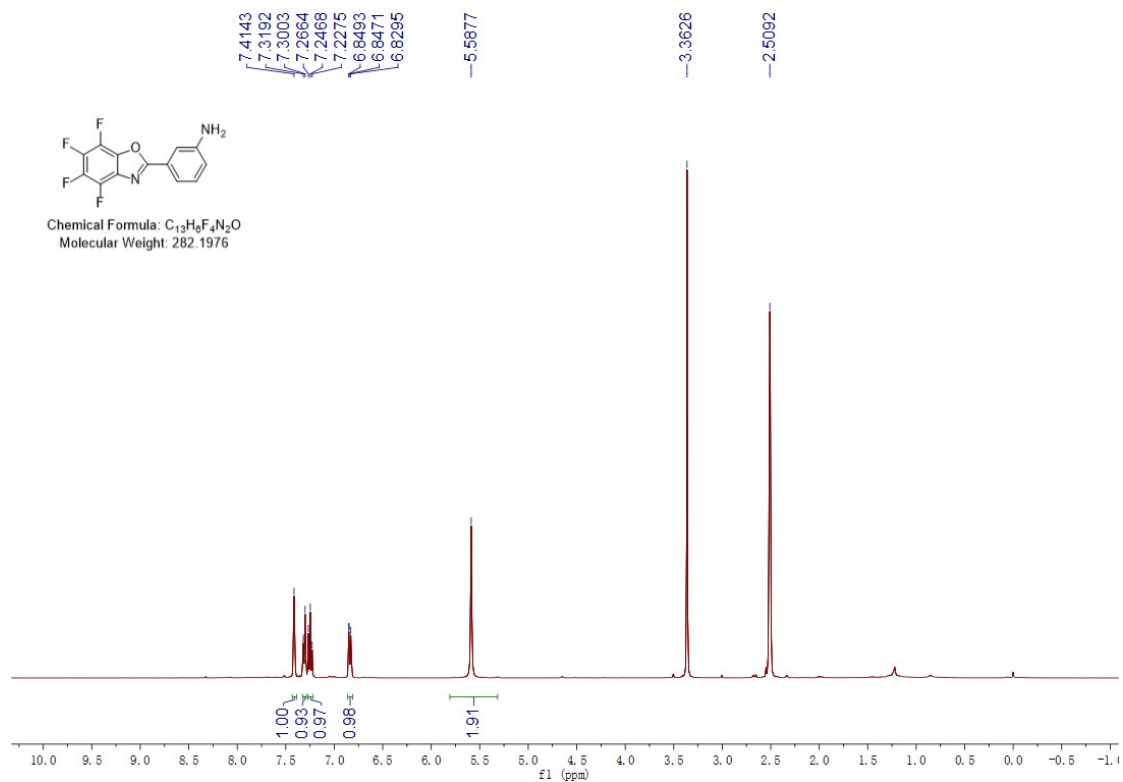

$^{13}\text{C}$  NMR (101 MHz, DMSO)

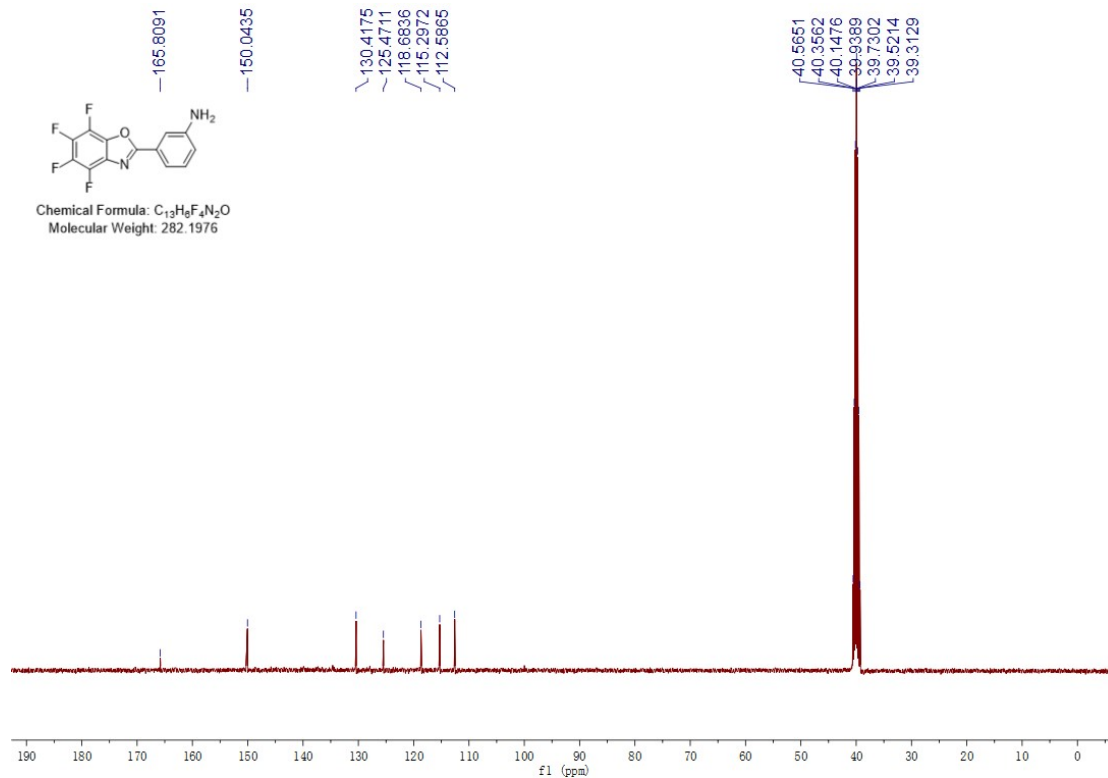

$^{19}\text{F}$  NMR (376 MHz, DMSO)

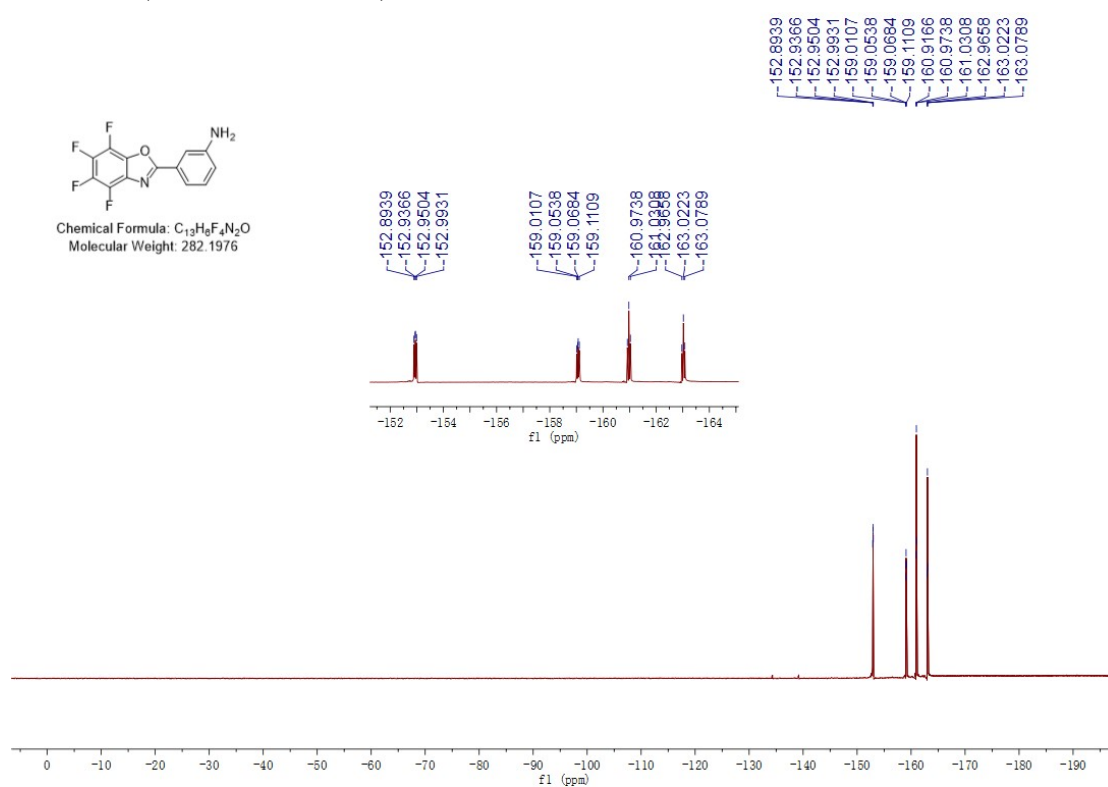

HRMS spectra

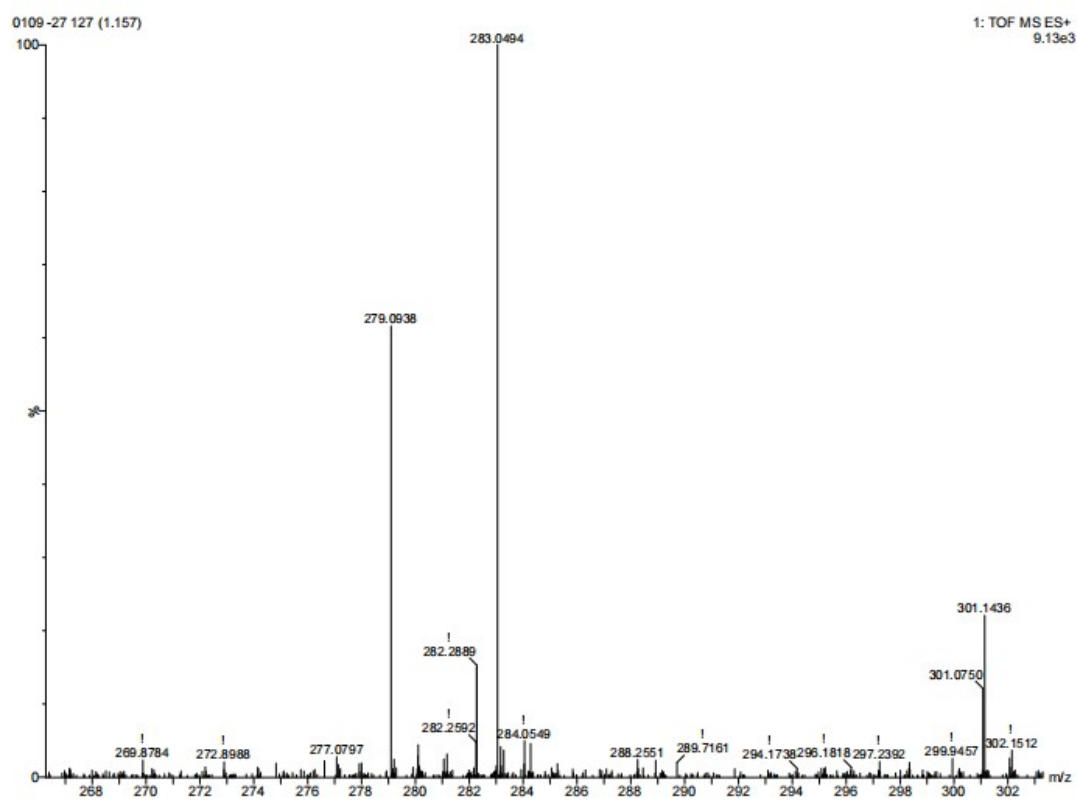

## 2-(perfluorobenzo[d]oxazol-2-yl)aniline (**3f**)

$^1\text{H}$  NMR (400 MHz, DMSO)

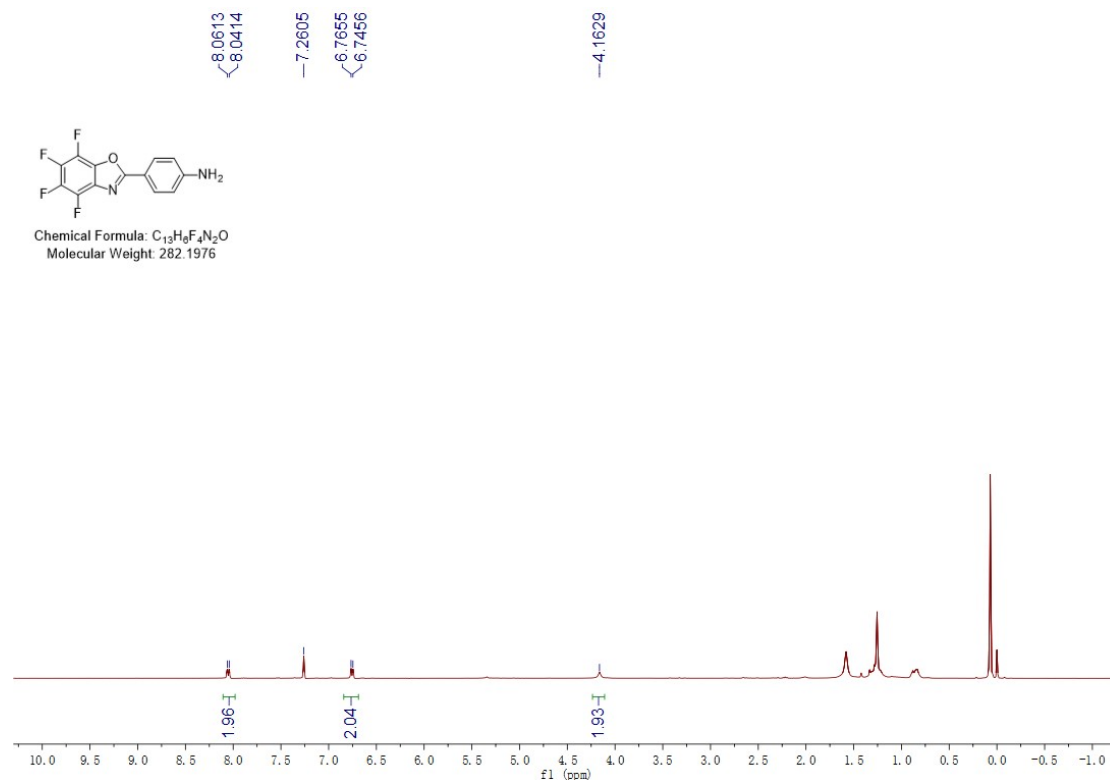

$^{13}\text{C}$  NMR (101 MHz, DMSO)

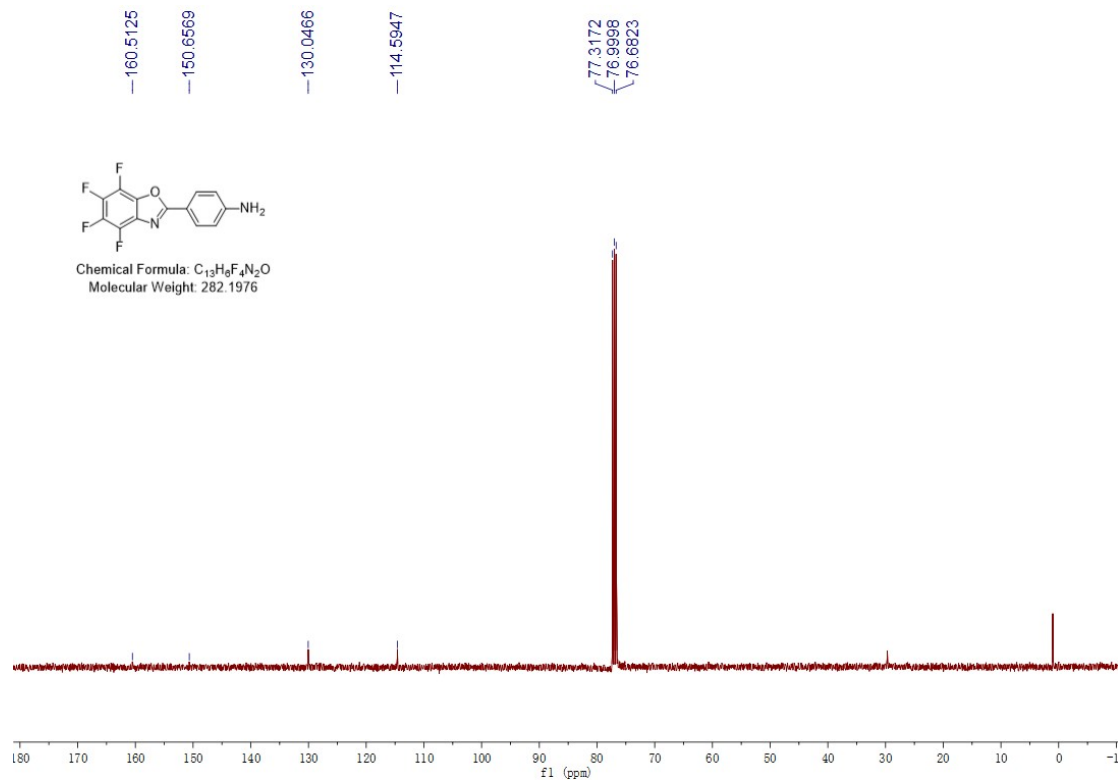

$^{19}\text{F}$  NMR (376 MHz, DMSO)

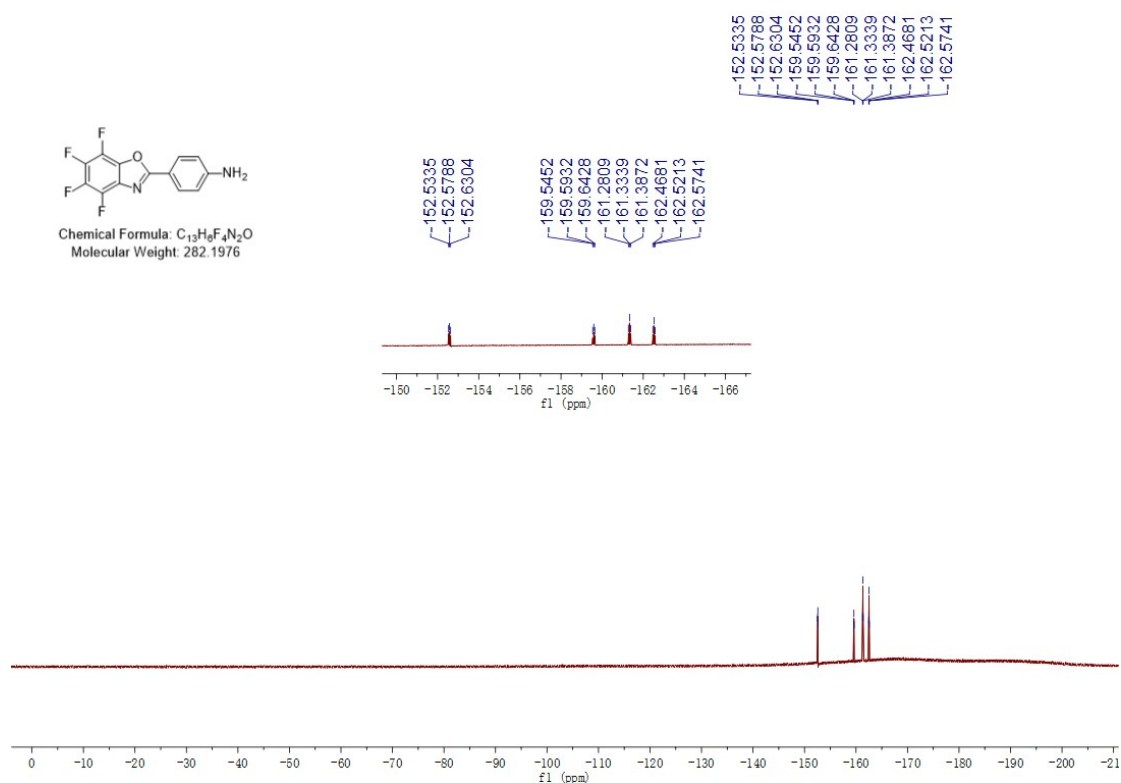

HRMS spectra

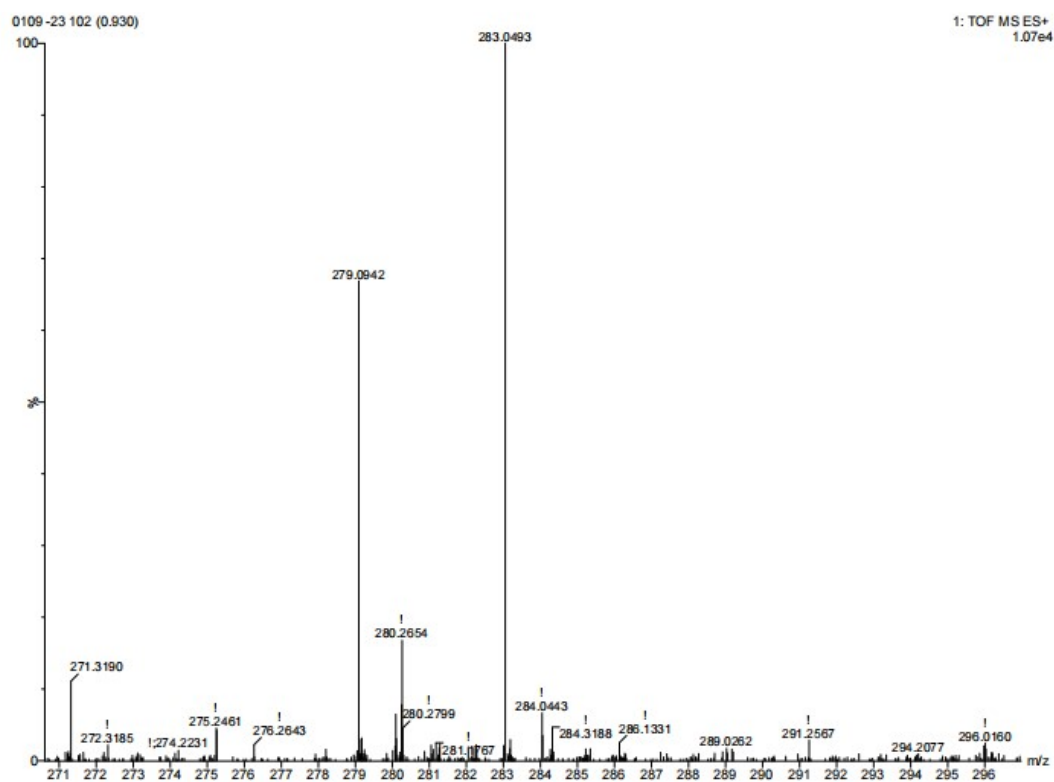

# 4,5,6,7-tetrafluoro-2-(3-(trifluoromethyl)phenyl)benzo[d]oxazole(3g)

$^1\text{H}$  NMR (400 MHz, DMSO)

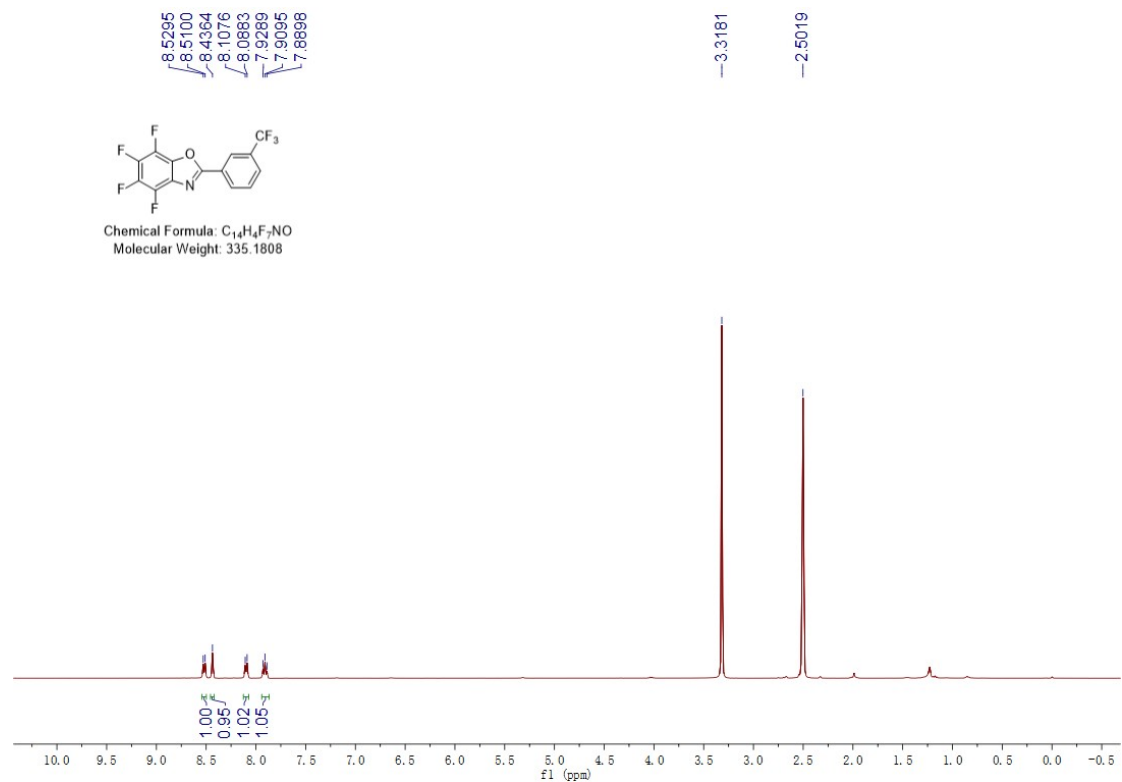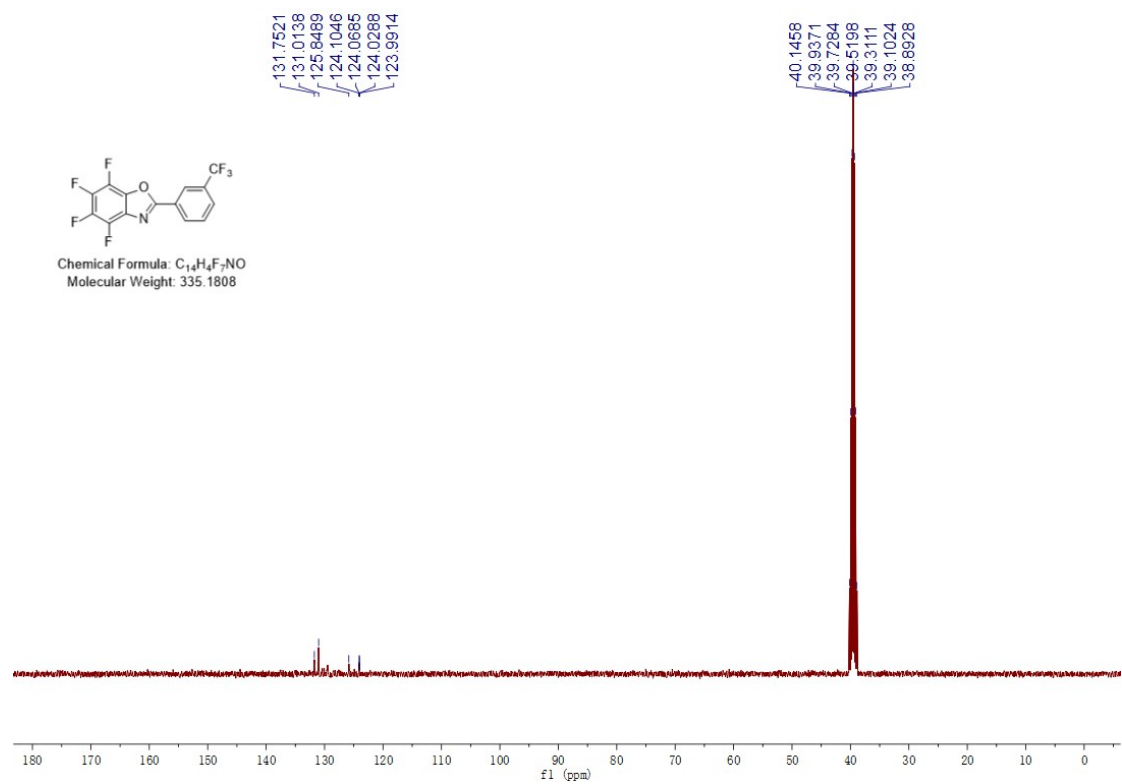

$^{19}\text{F}$  NMR (376 MHz, DMSO)

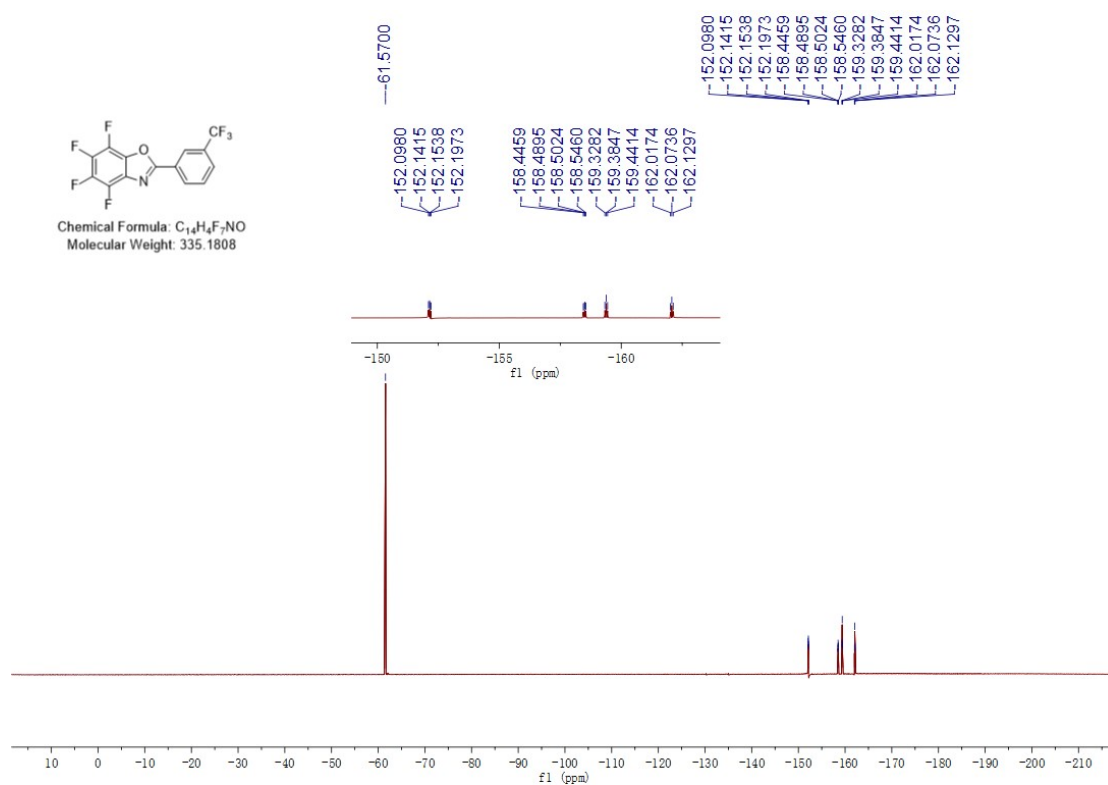

4,5,6,7-tetrafluoro-2-(4-(trifluoromethyl)phenyl)benzo[d]oxazole (**3h**)

$^1\text{H}$  NMR (400 MHz, DMSO)

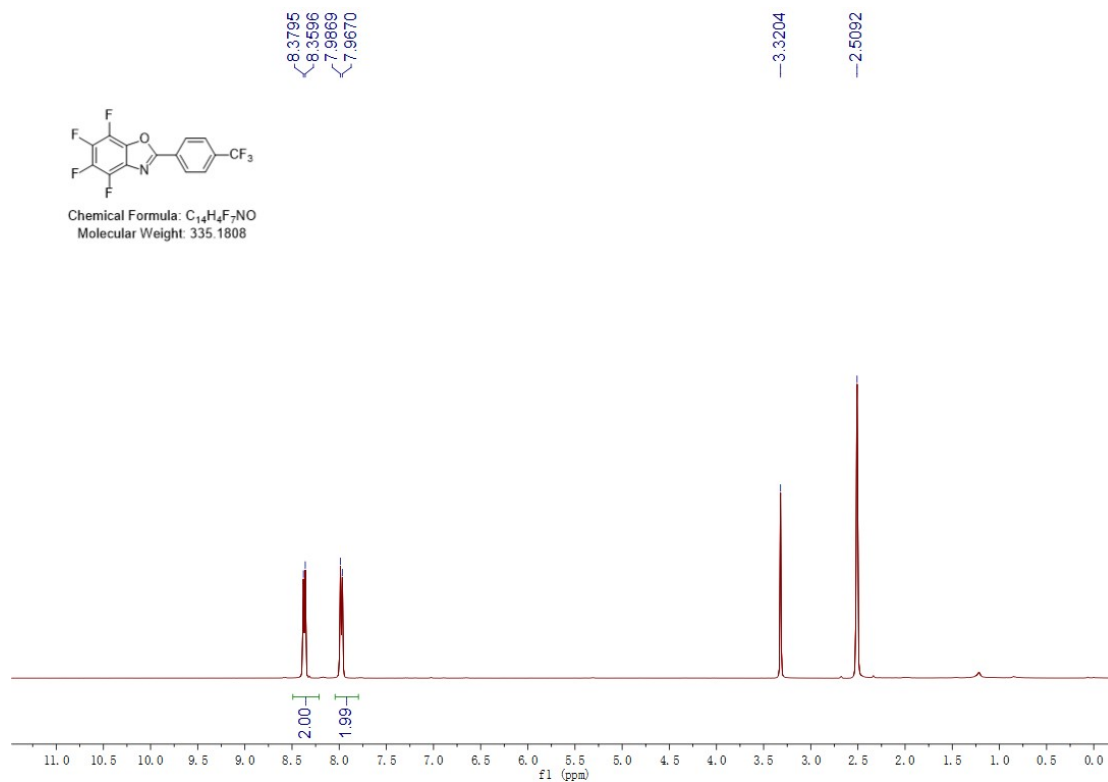

$^{13}\text{C}$  NMR (101 MHz, DMSO)

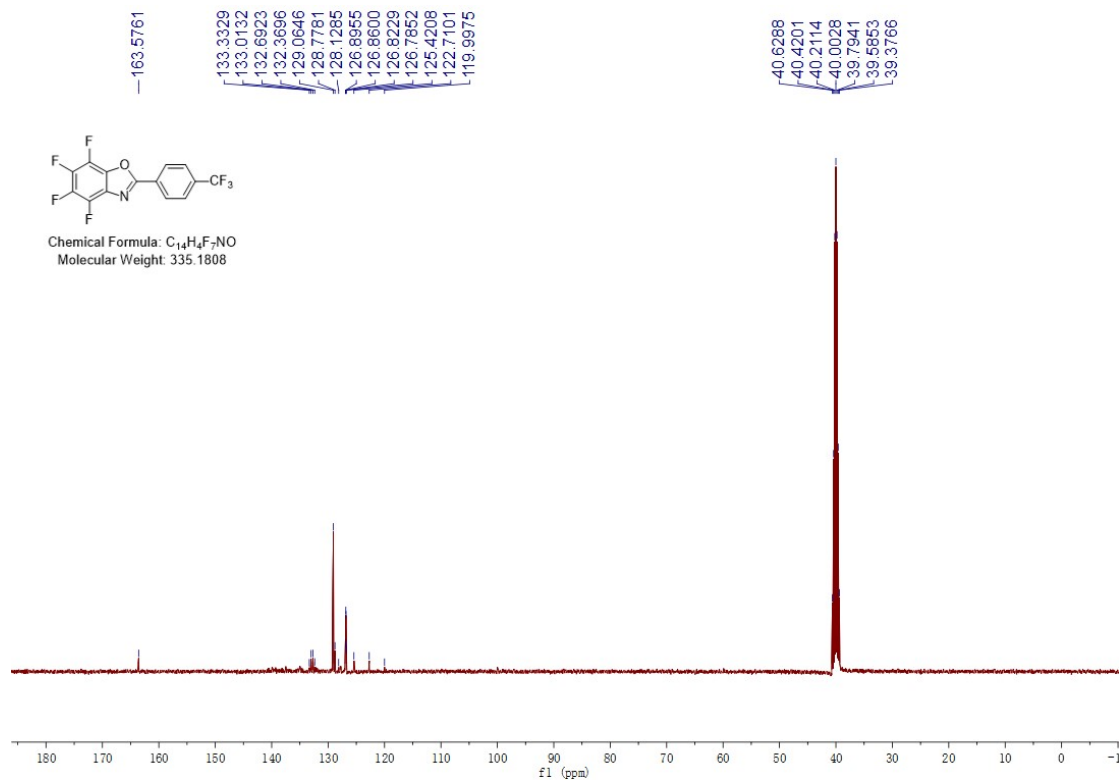

# <sup>19</sup>F NMR (376 MHz, DMSO)

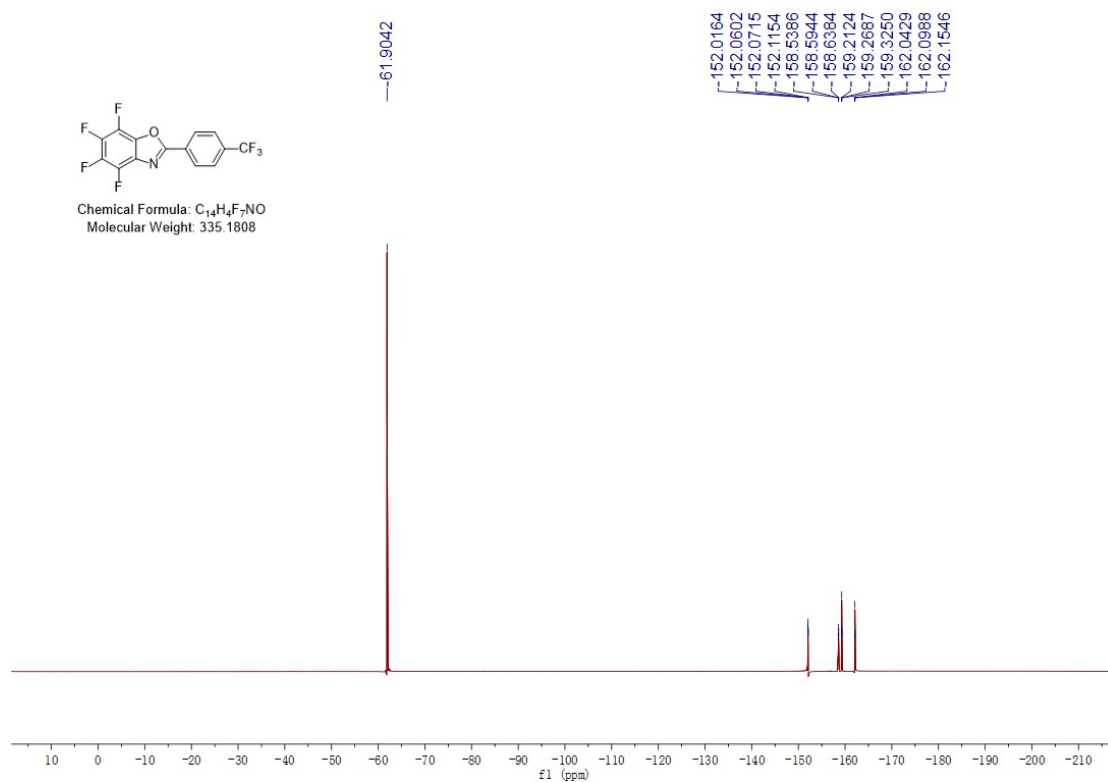

## HRMS spectra

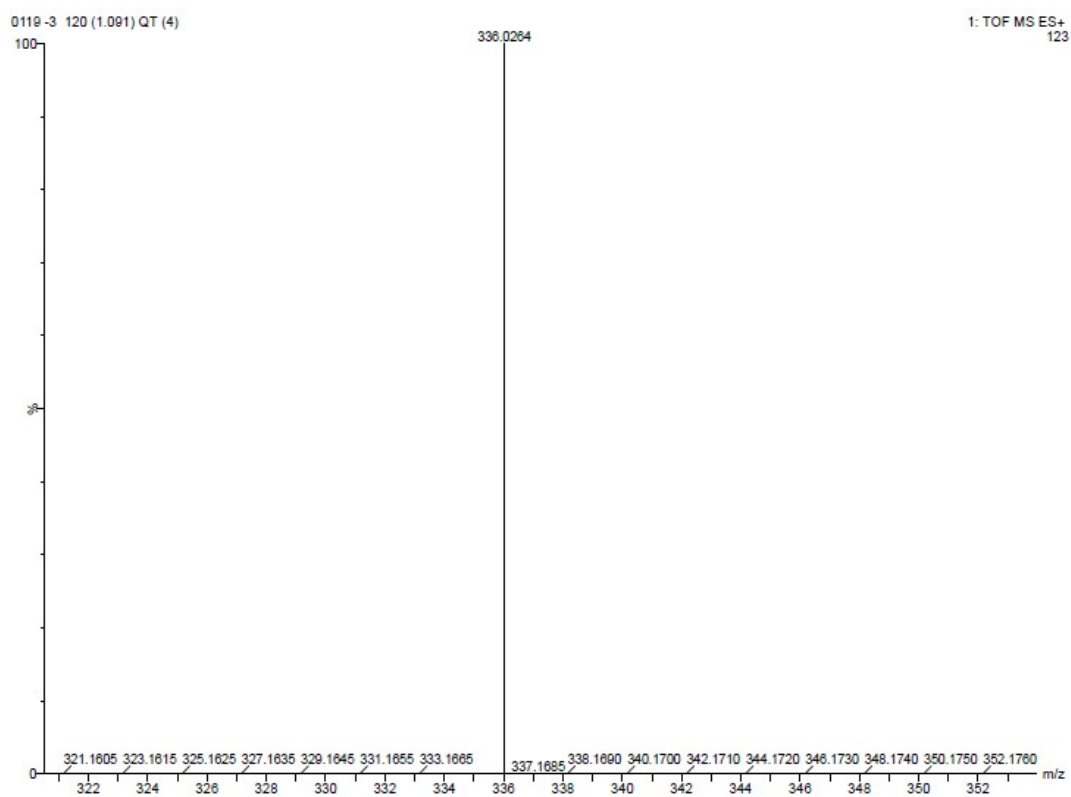

# 2-(4-chlorophenyl)-4,5,6,7-tetrafluorobenzo[d]oxazole(3i)

<sup>1</sup>H NMR (400 MHz, DMSO)

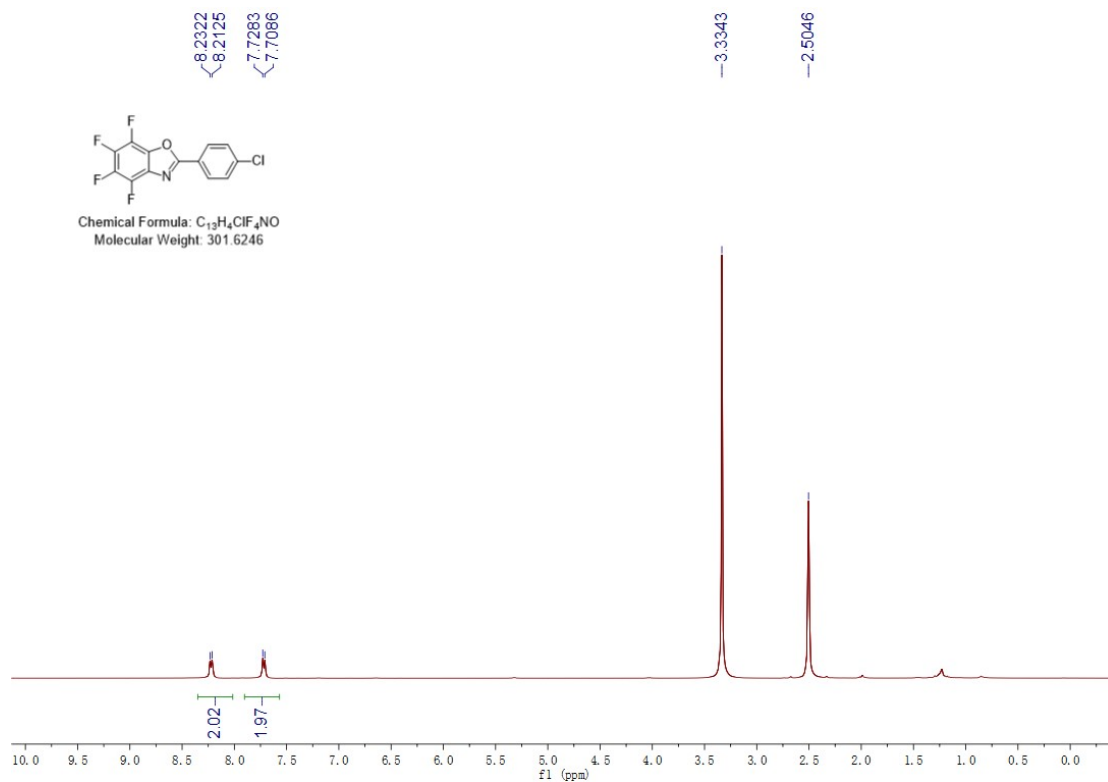

<sup>13</sup>C NMR (101 MHz, DMSO)

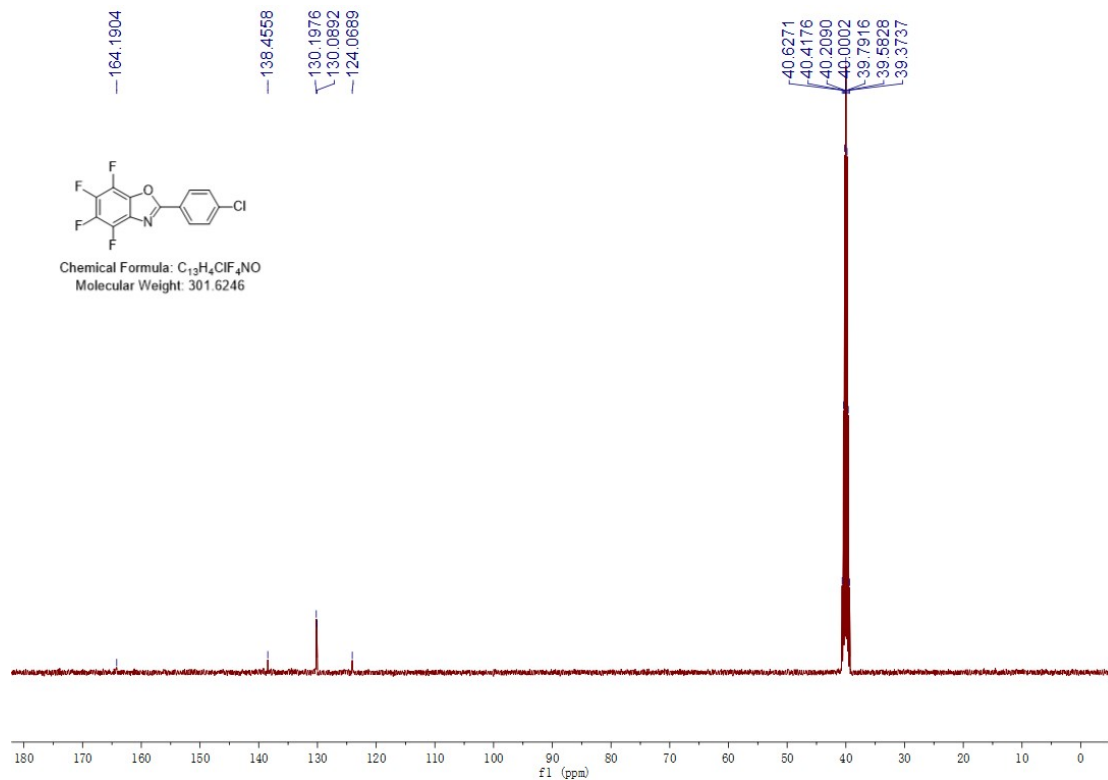

$^{19}\text{F}$  NMR (376 MHz, DMSO)

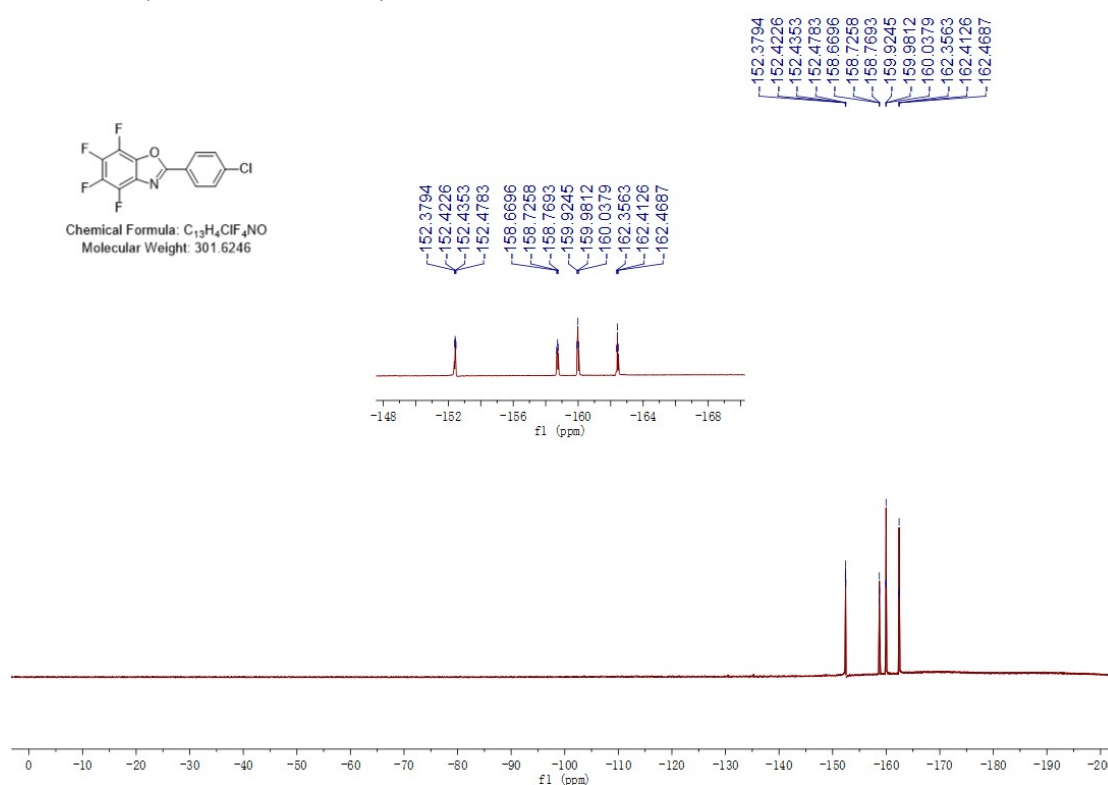

HRMS spectra

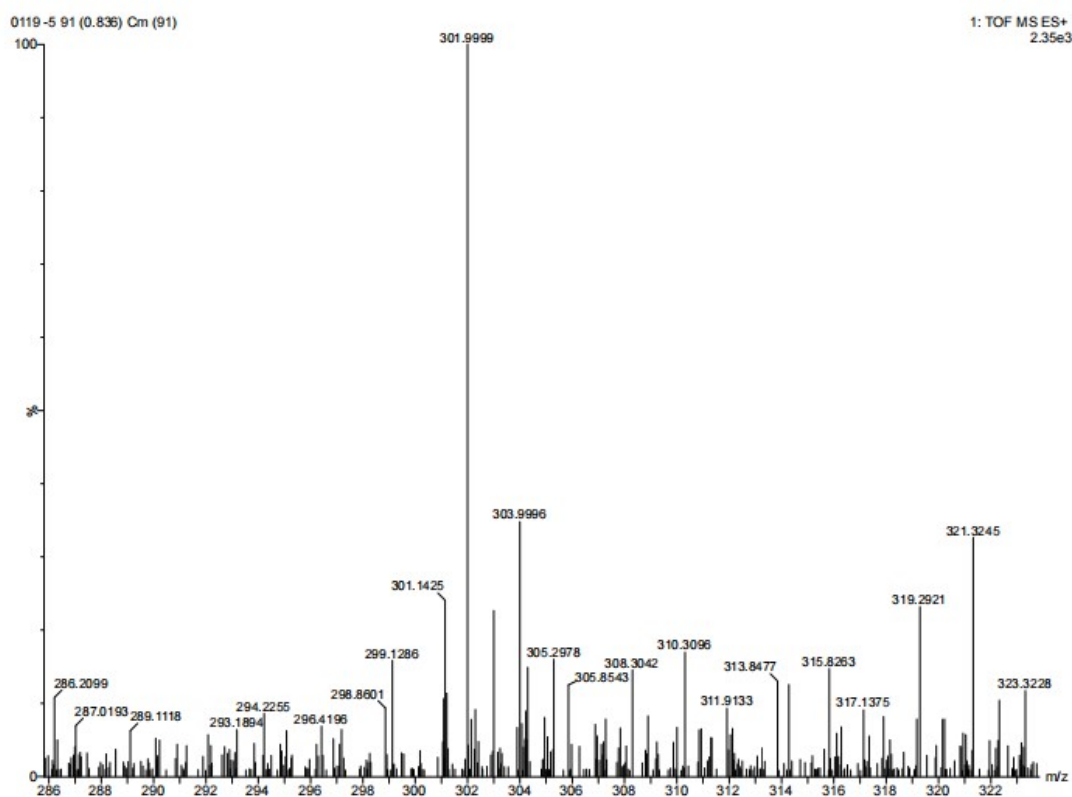

# 2-(3-bromophenyl)-4,5,6,7-tetrafluorobenzo[d]oxazole (**3j**)

<sup>1</sup>H NMR (400 MHz, DMSO)

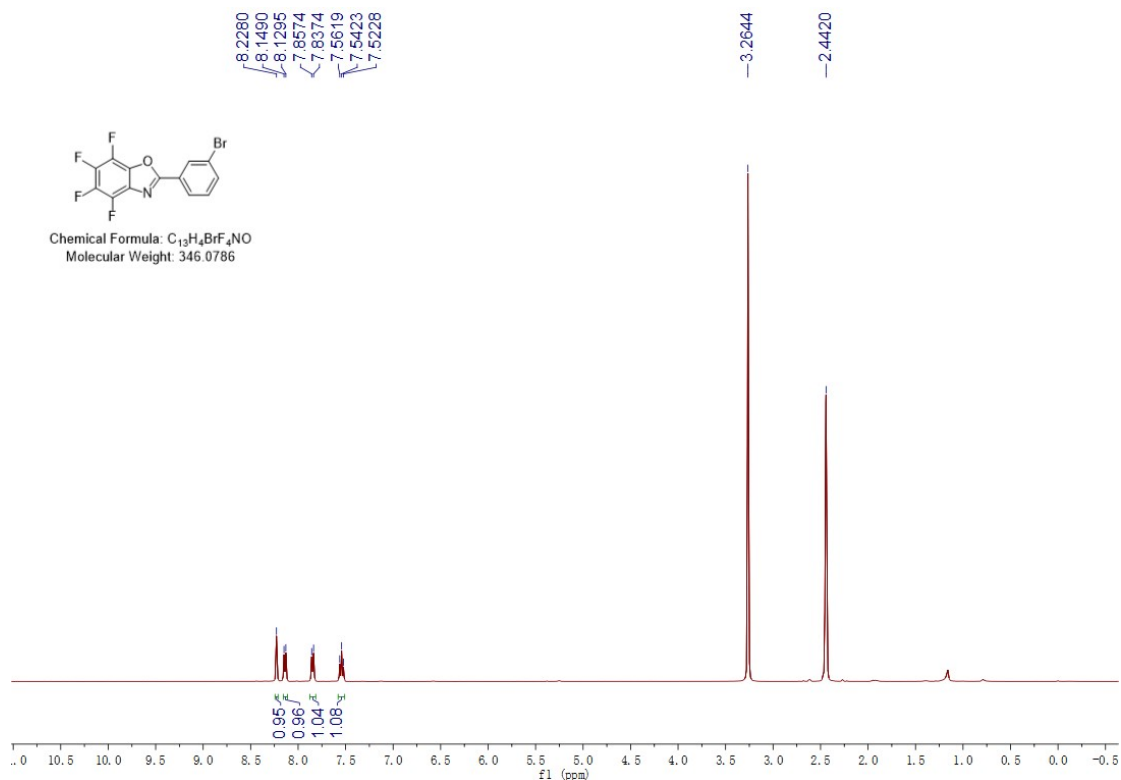

<sup>13</sup>C NMR (101 MHz, DMSO)

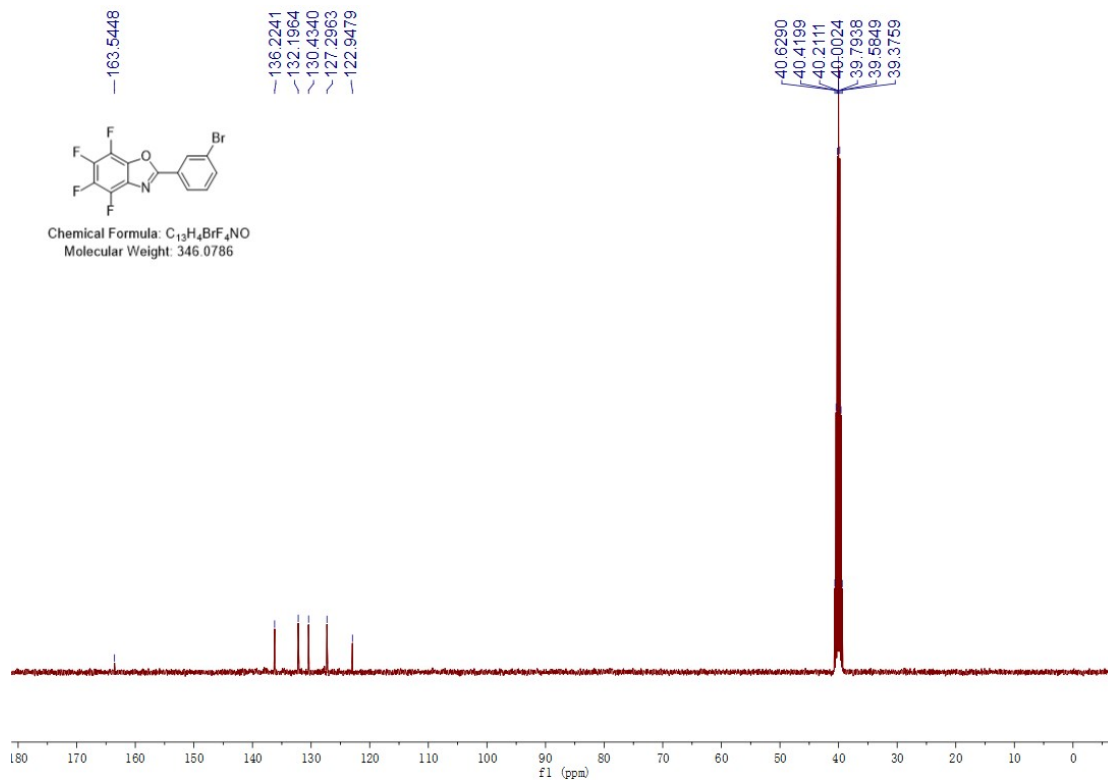

$^{19}\text{F}$  NMR (376 MHz, DMSO)

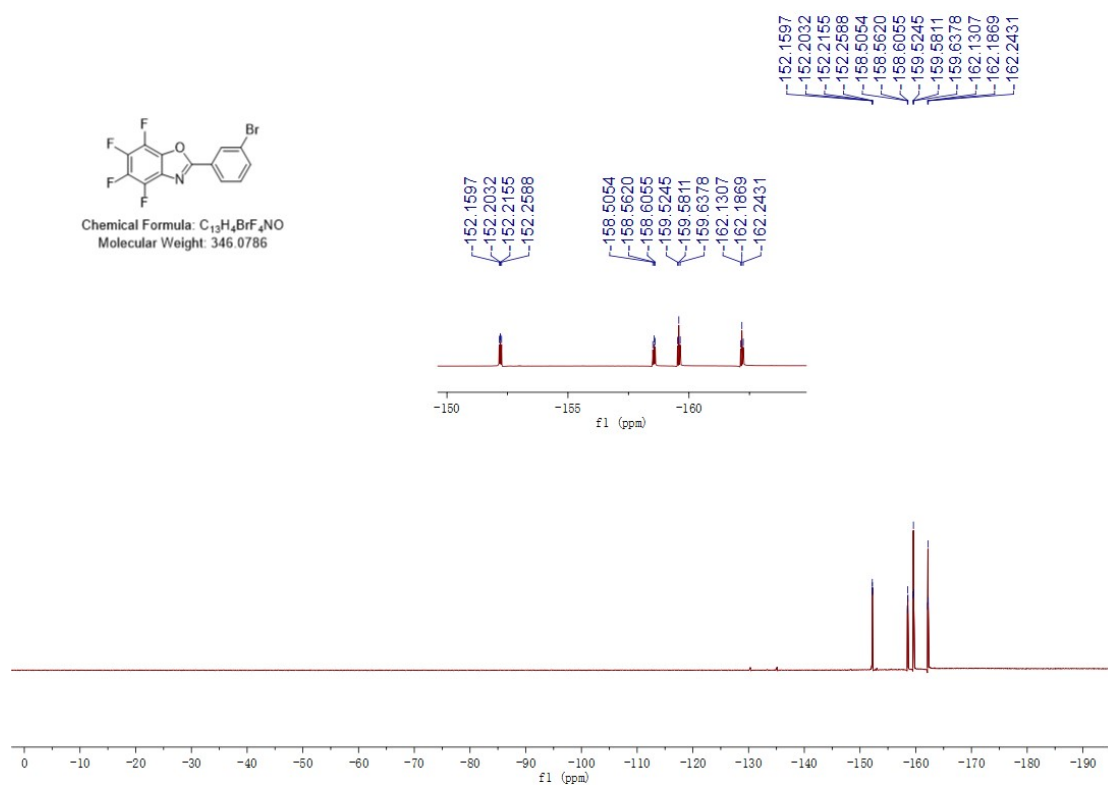

HRMS spectra

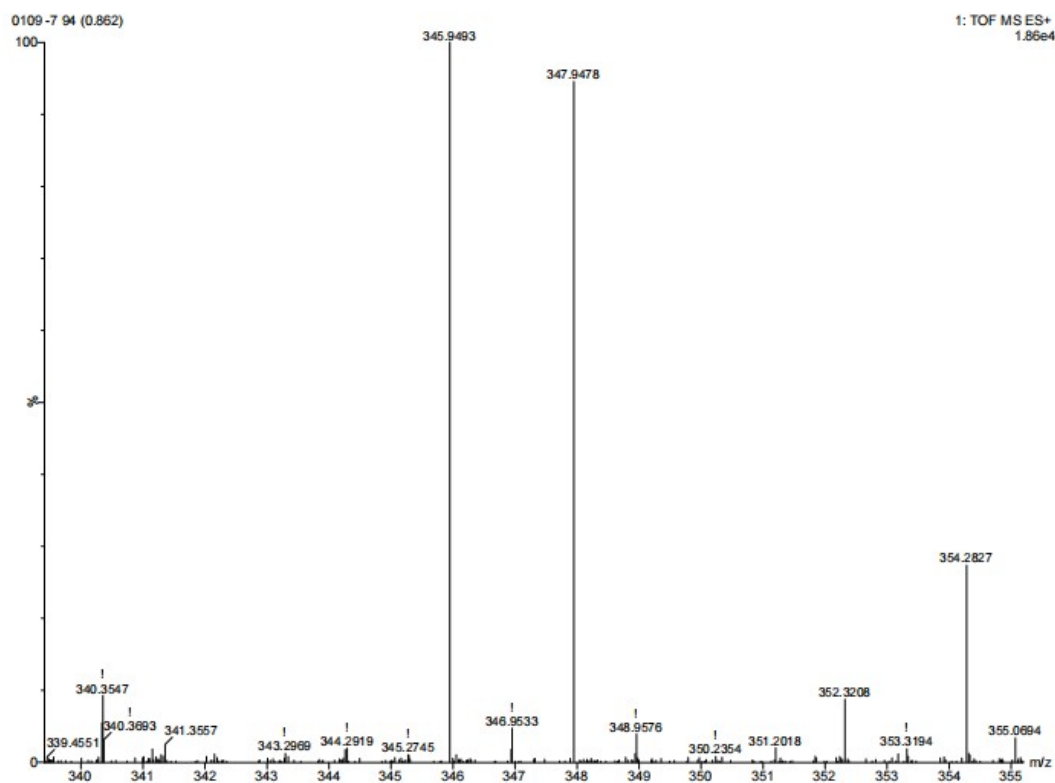

# 2-(4-bromophenyl)-4,5,6,7-tetrafluorobenzo[d]oxazole (**3k**)

<sup>1</sup>H NMR (400 MHz, DMSO)

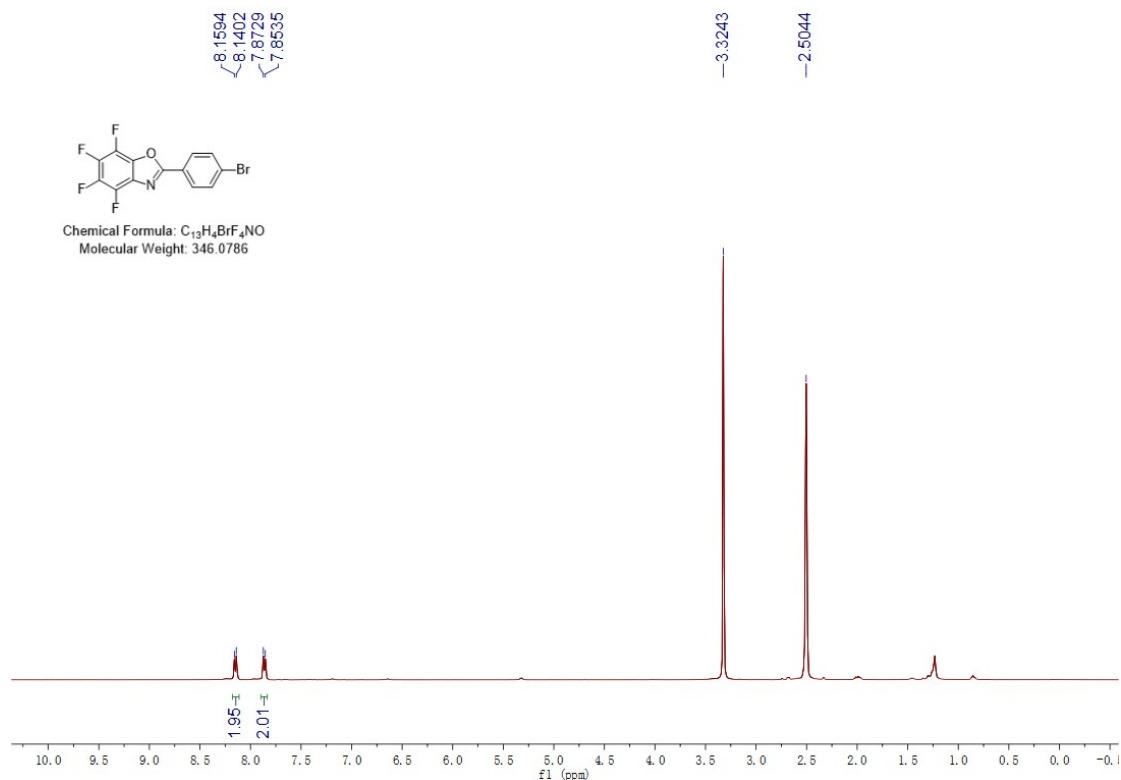

<sup>13</sup>C NMR (101 MHz, DMSO)

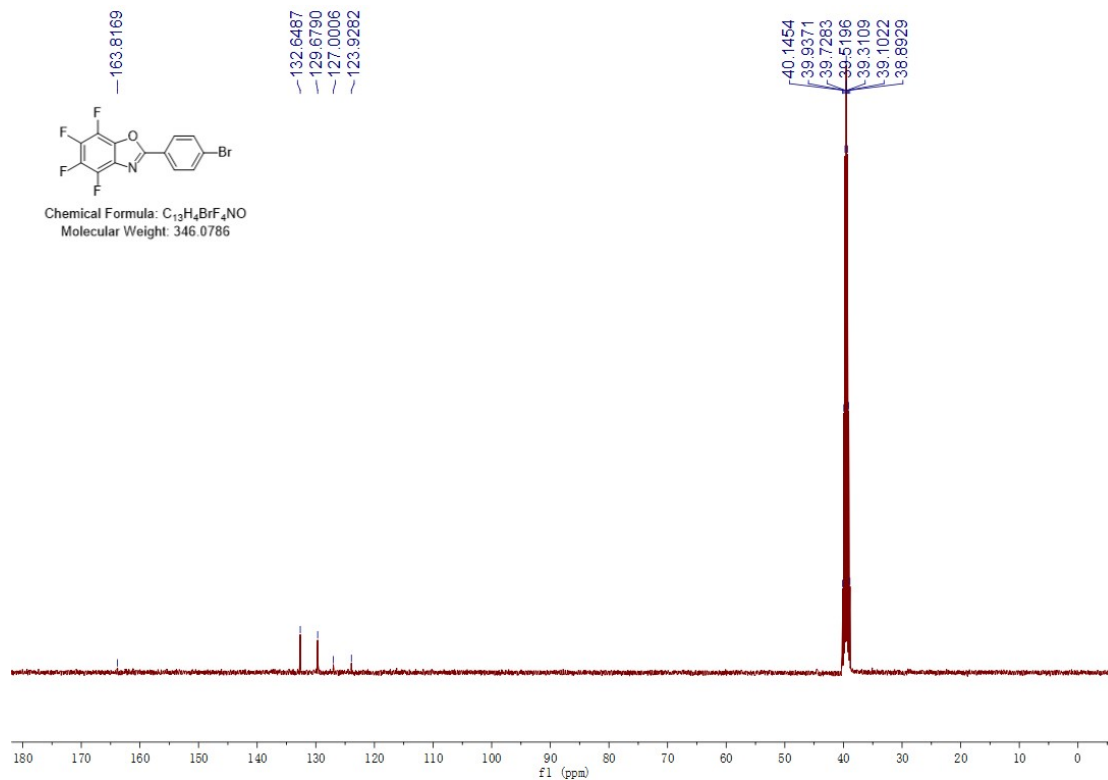

# <sup>19</sup>F NMR (376 MHz, DMSO)

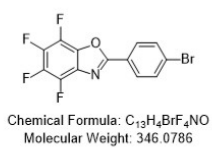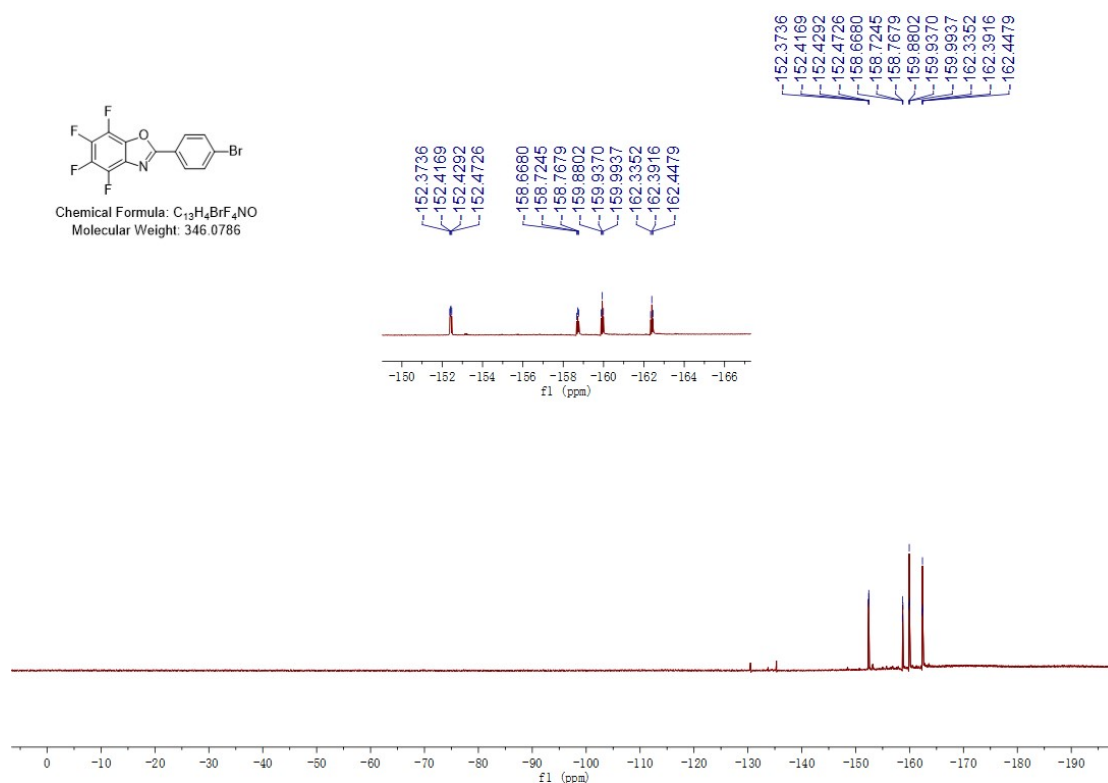

## HRMS spectra

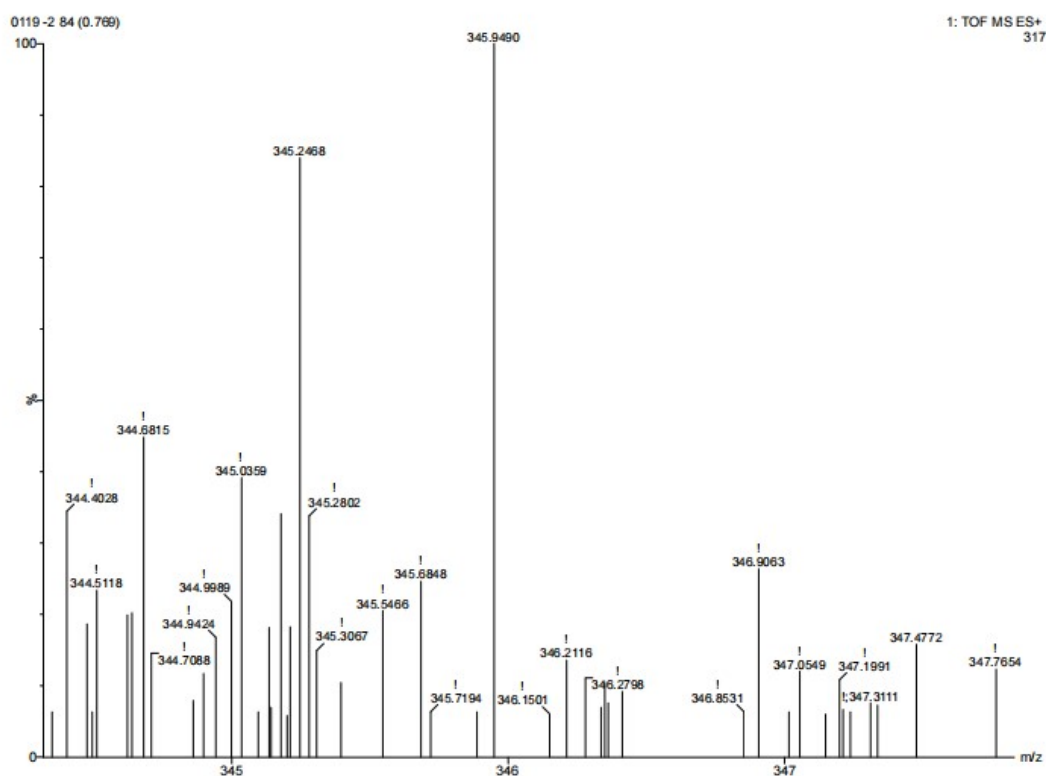

# 4,5,6,7-tetrafluoro-2-(naphthalen-2-yl)benzo[d]oxazole (**3I**)

<sup>1</sup>H NMR (400 MHz, DMSO)

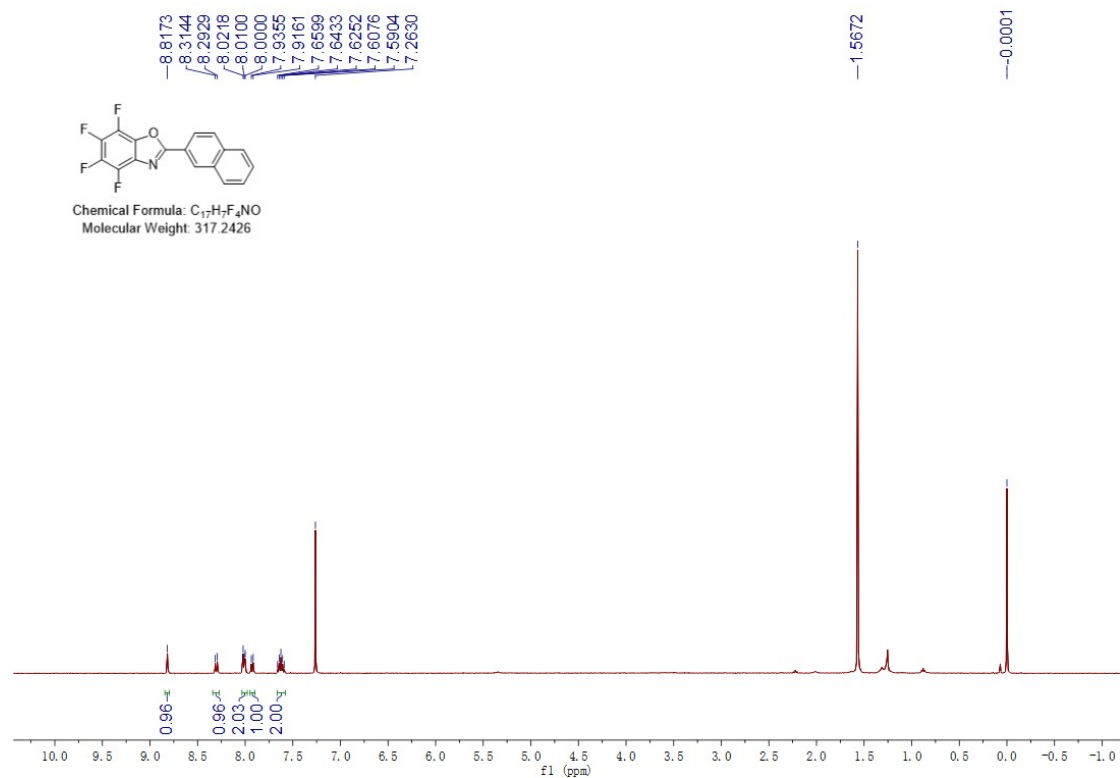

<sup>13</sup>C NMR (101 MHz, DMSO)

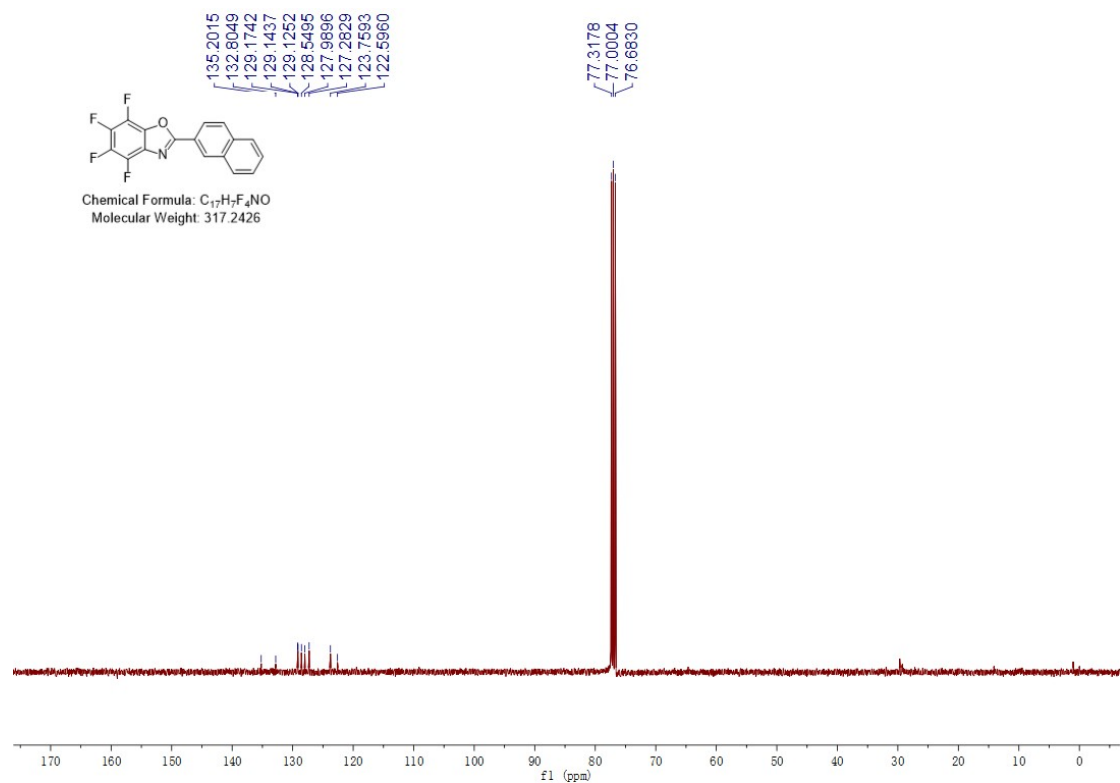

$^{19}\text{F}$  NMR (376 MHz, DMSO)

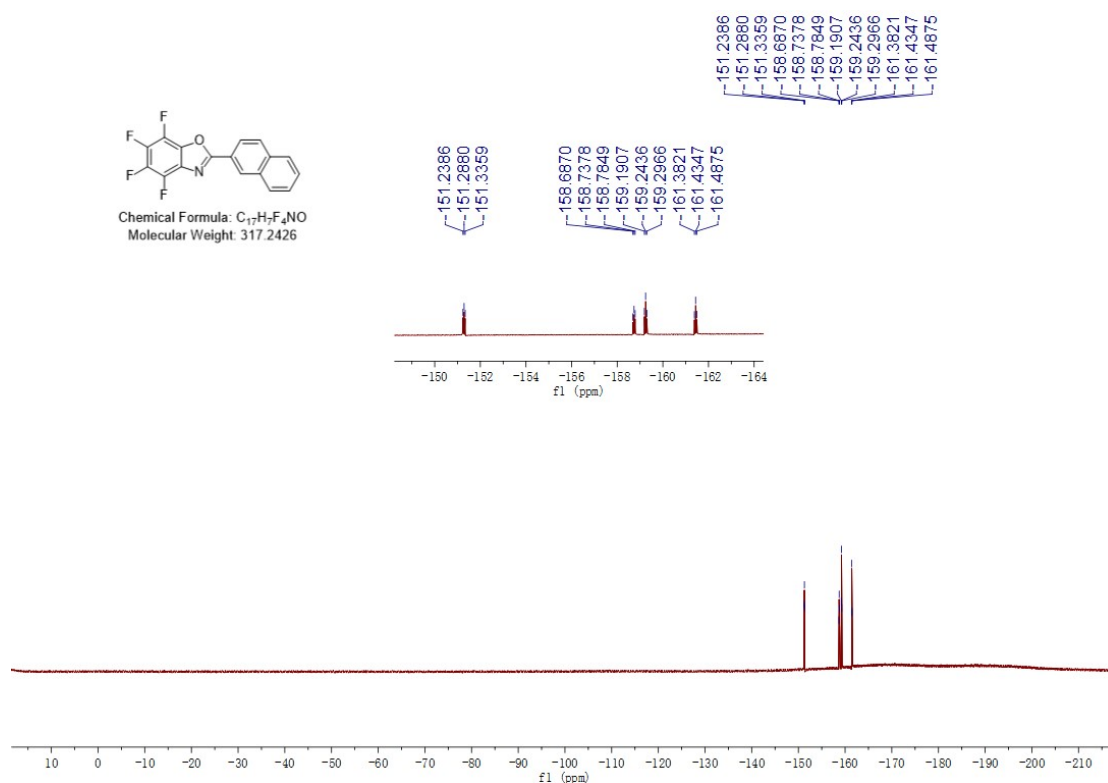

HRMS spectra

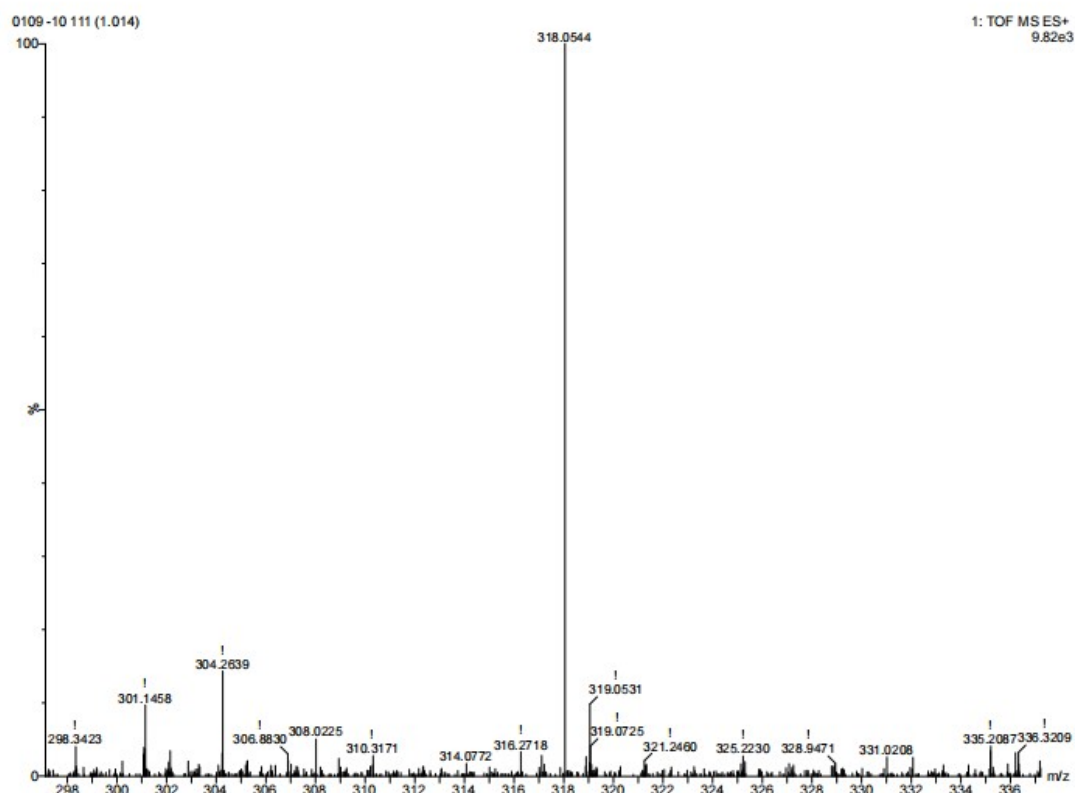

# 2-(3,4-difluorophenyl)-4,5,6,7-tetrafluorobenzo[*d*]oxazole (**3m**)

<sup>1</sup>H NMR (400 MHz, DMSO)

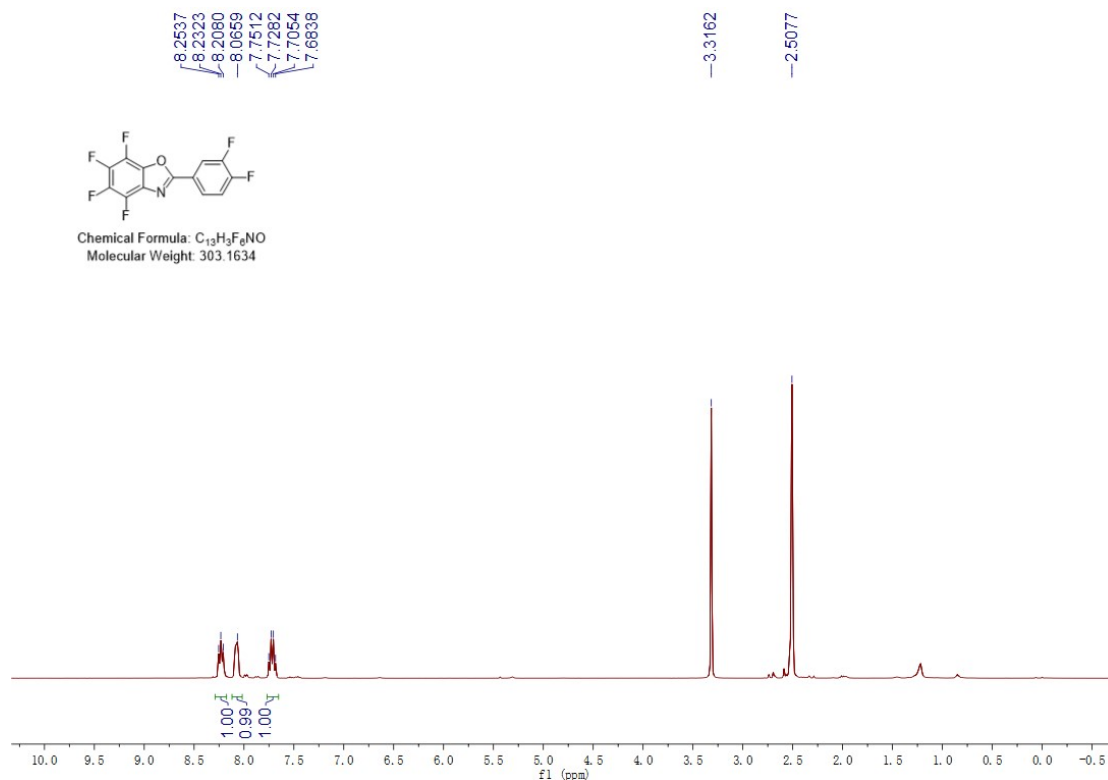

<sup>13</sup>C NMR (101 MHz, DMSO)

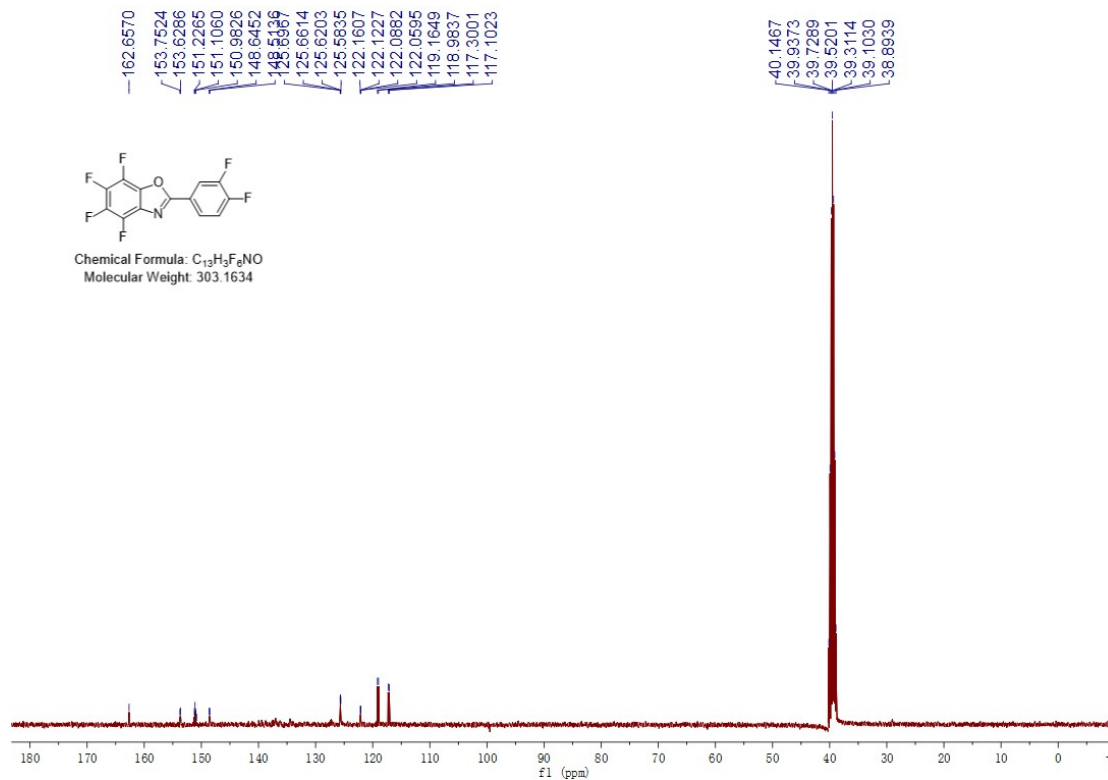

# <sup>19</sup>F NMR (376 MHz, DMSO)

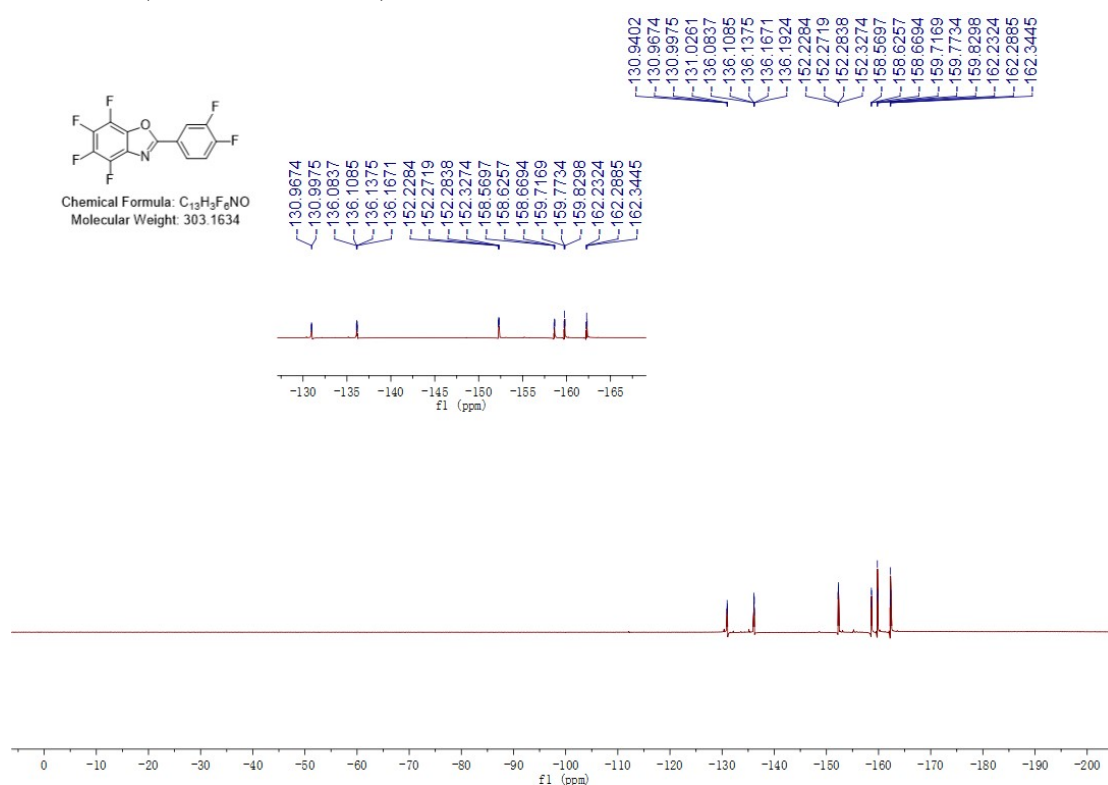

## HRMS spectra

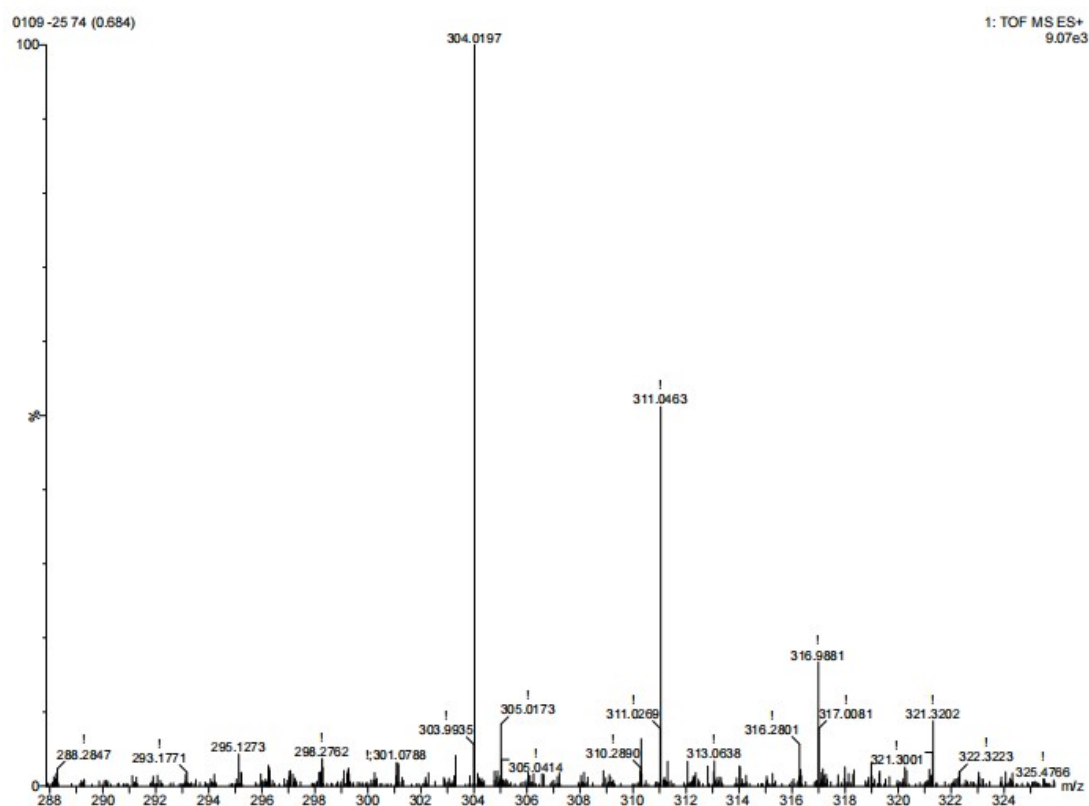

# 2-methyl-2-(perfluorobenzo[d]oxazol-2-yl)aniline (**3n**)

<sup>1</sup>H NMR (400 MHz, DMSO)

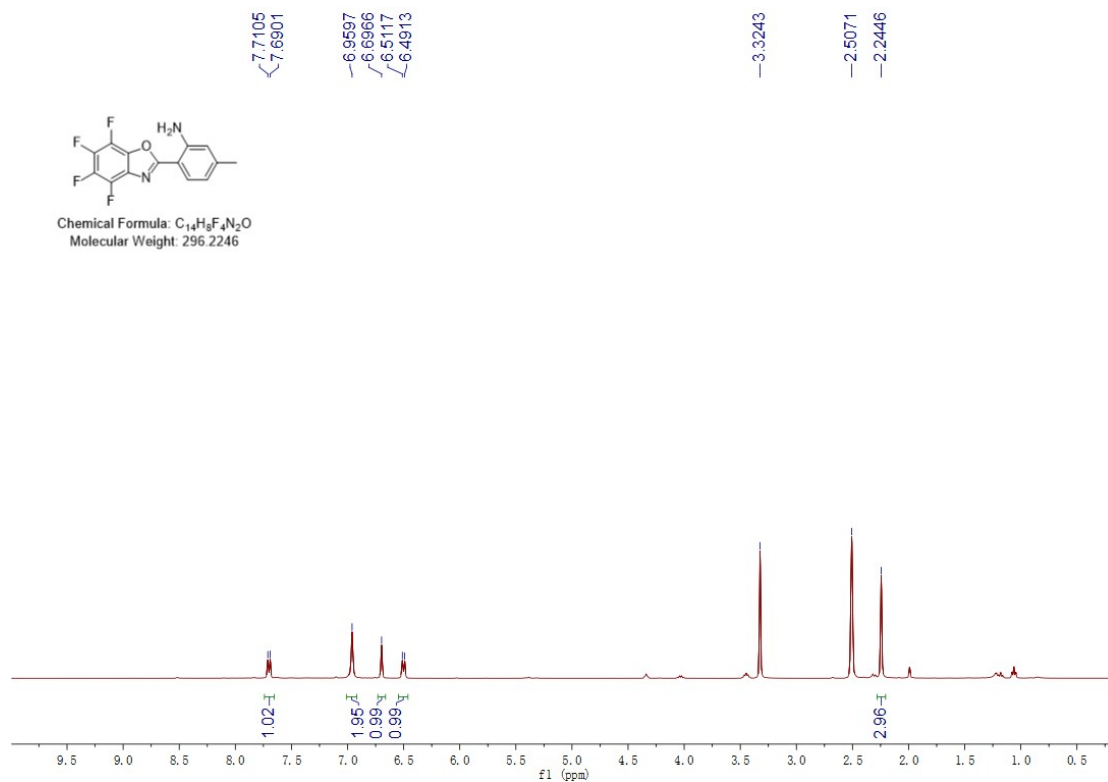

<sup>13</sup>C NMR (101 MHz, DMSO)

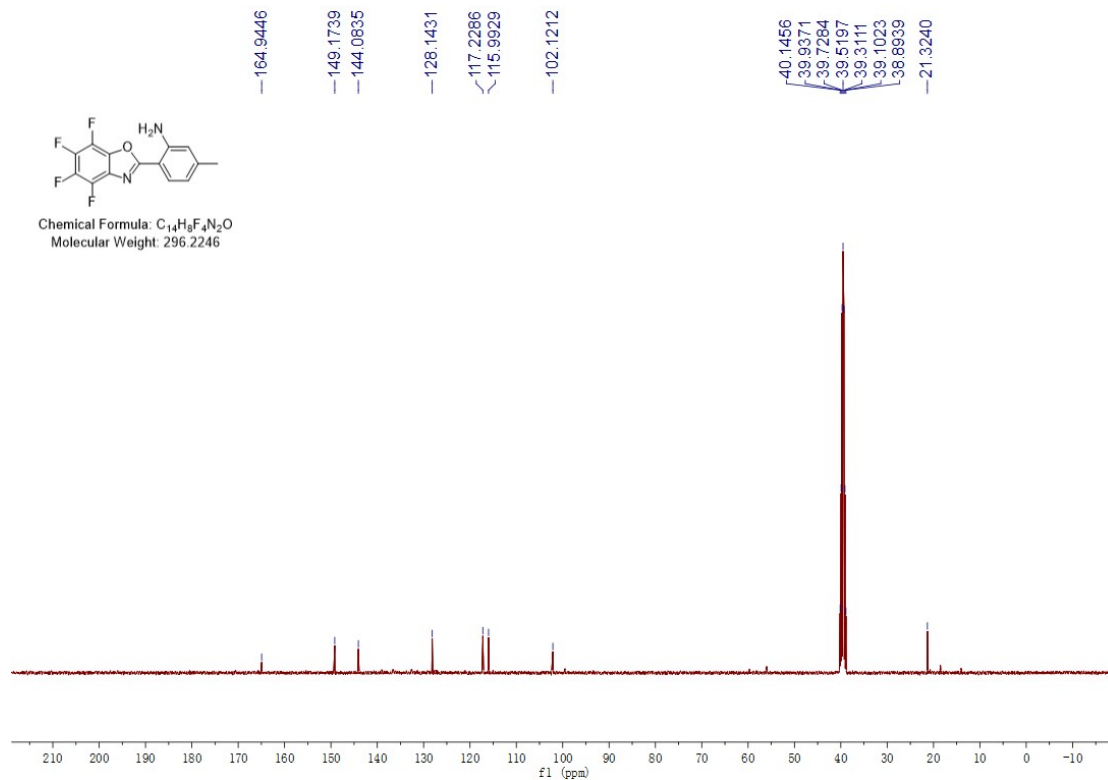

<sup>19</sup>F NMR (376 MHz, DMSO)

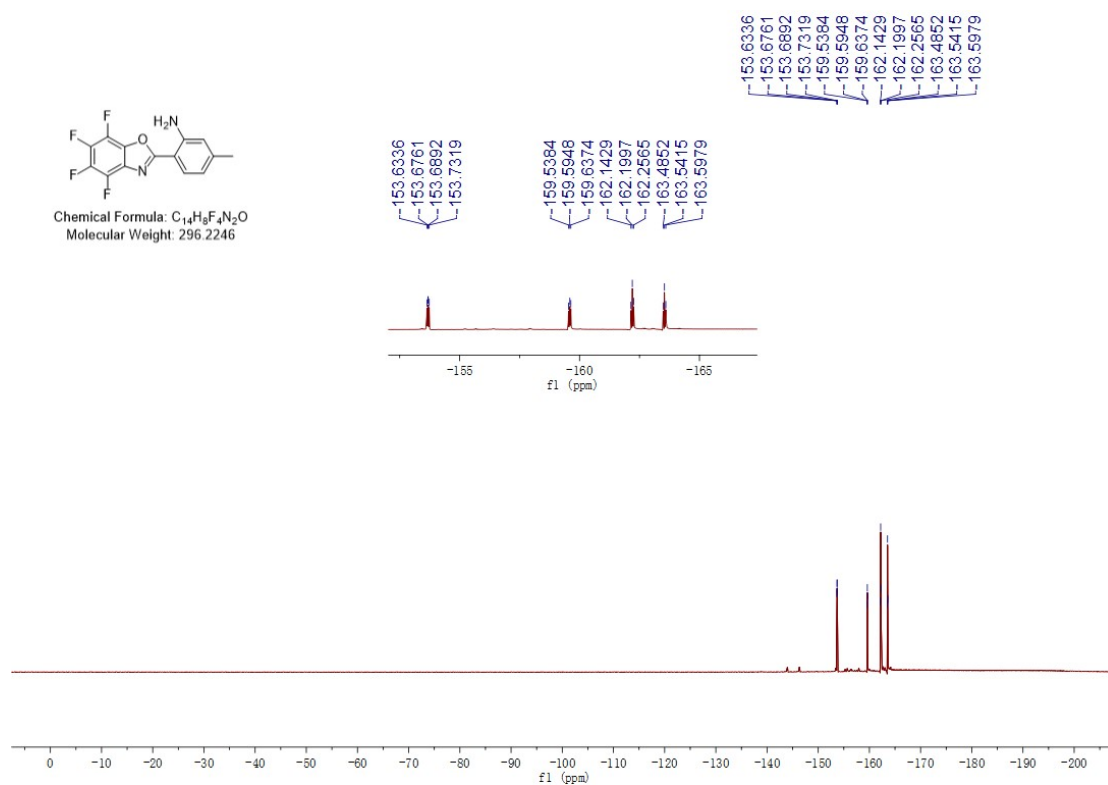

HRMS spectra

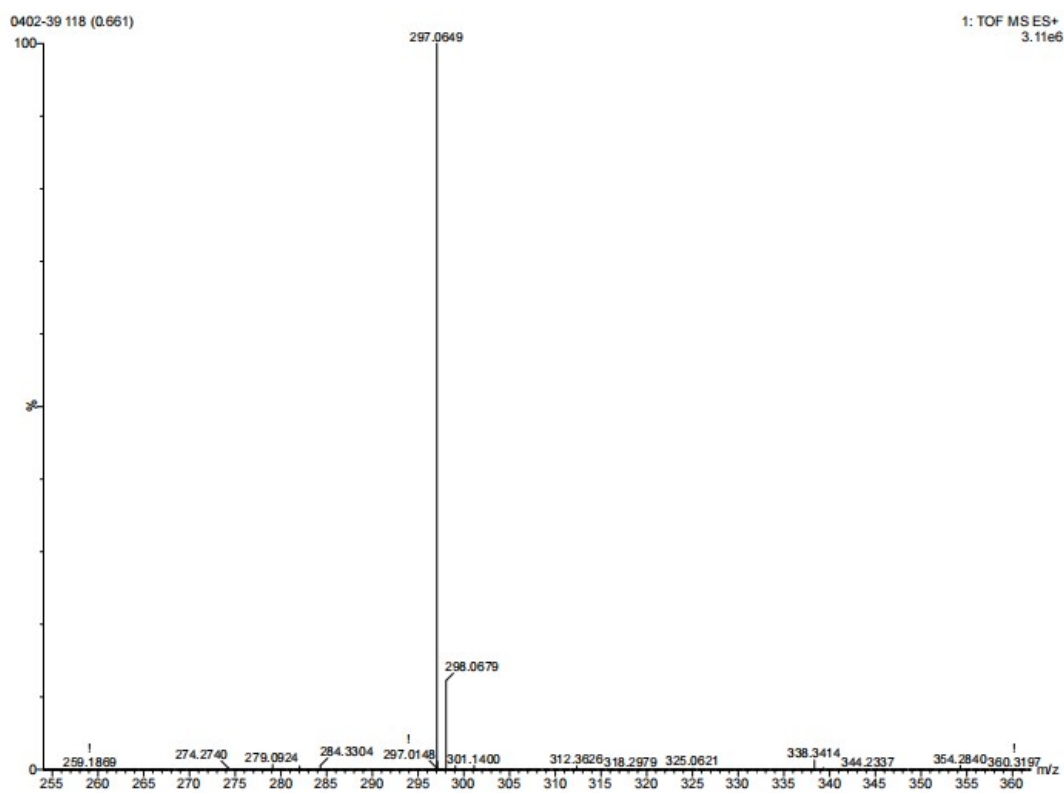

## 2-methoxy-2-(perfluorobenzo[d]oxazol-2-yl)aniline (**3o**)

$^1\text{H}$  NMR (400 MHz, DMSO)

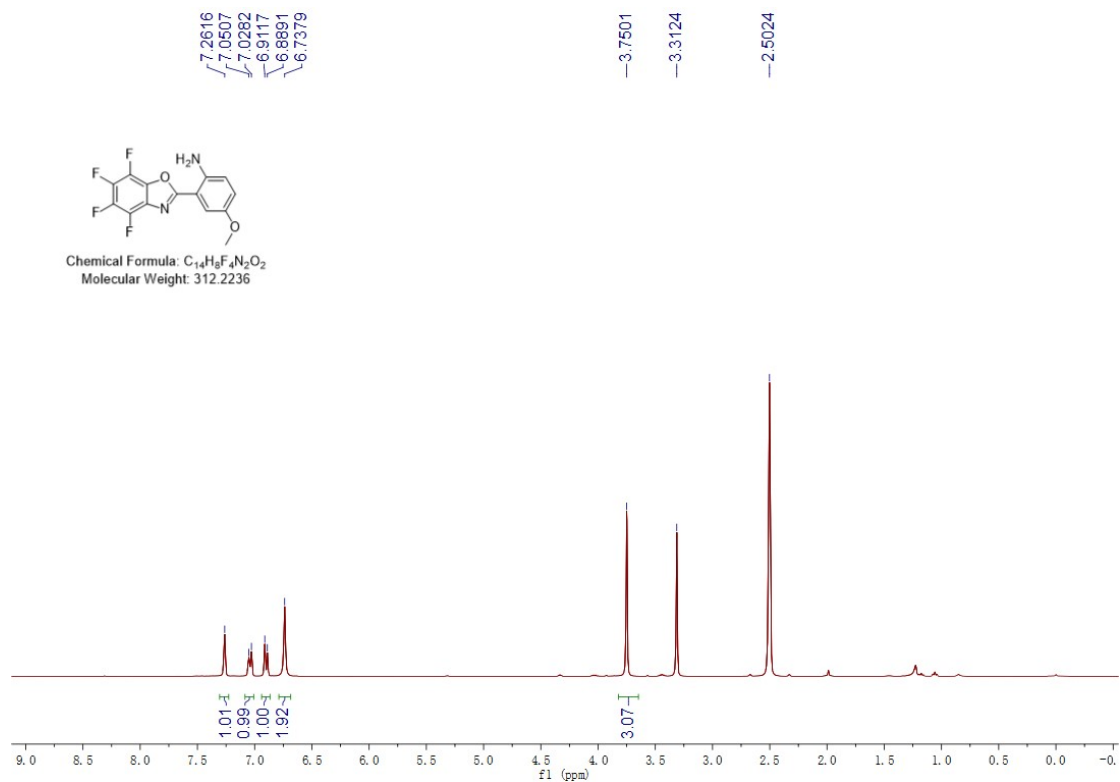

$^{13}\text{C}$  NMR (101 MHz, DMSO)

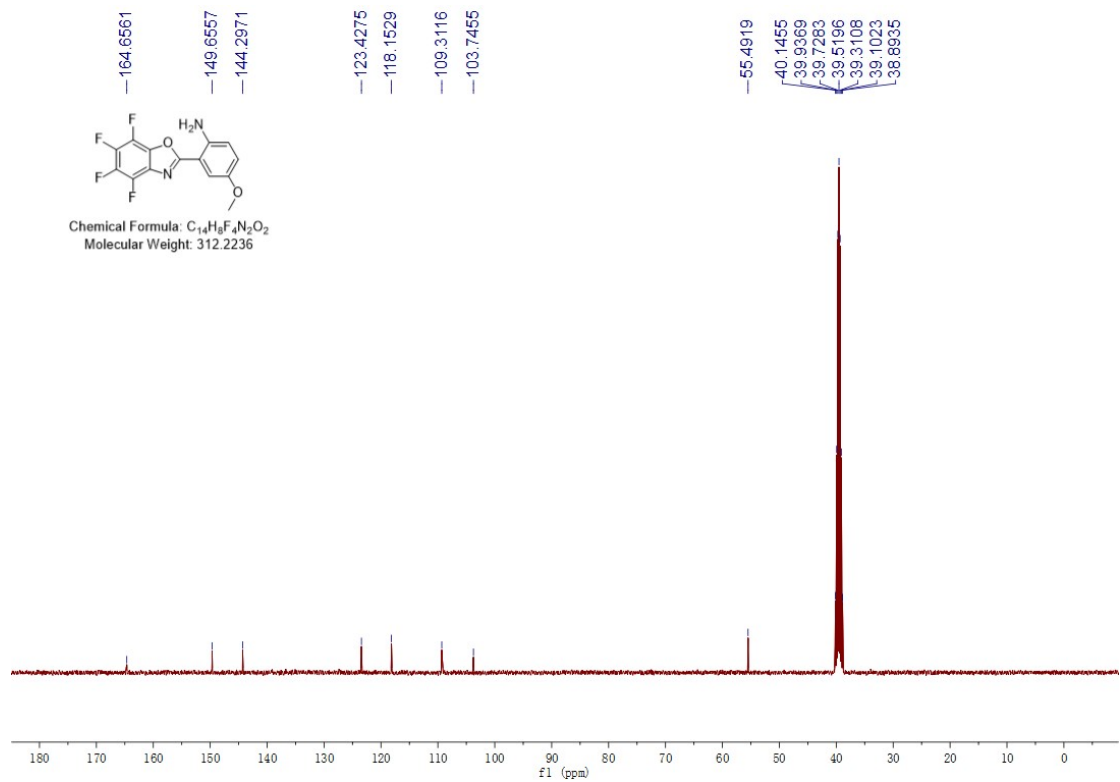

$^{19}\text{F}$  NMR (376 MHz, DMSO)

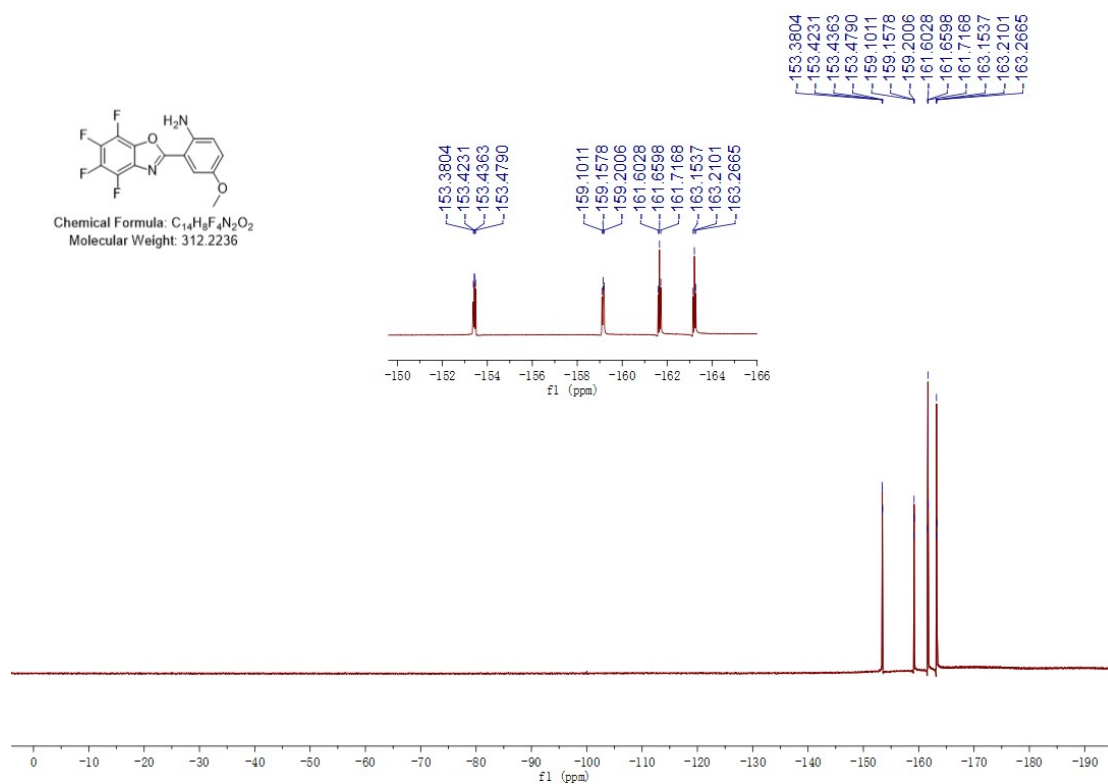

HRMS spectra

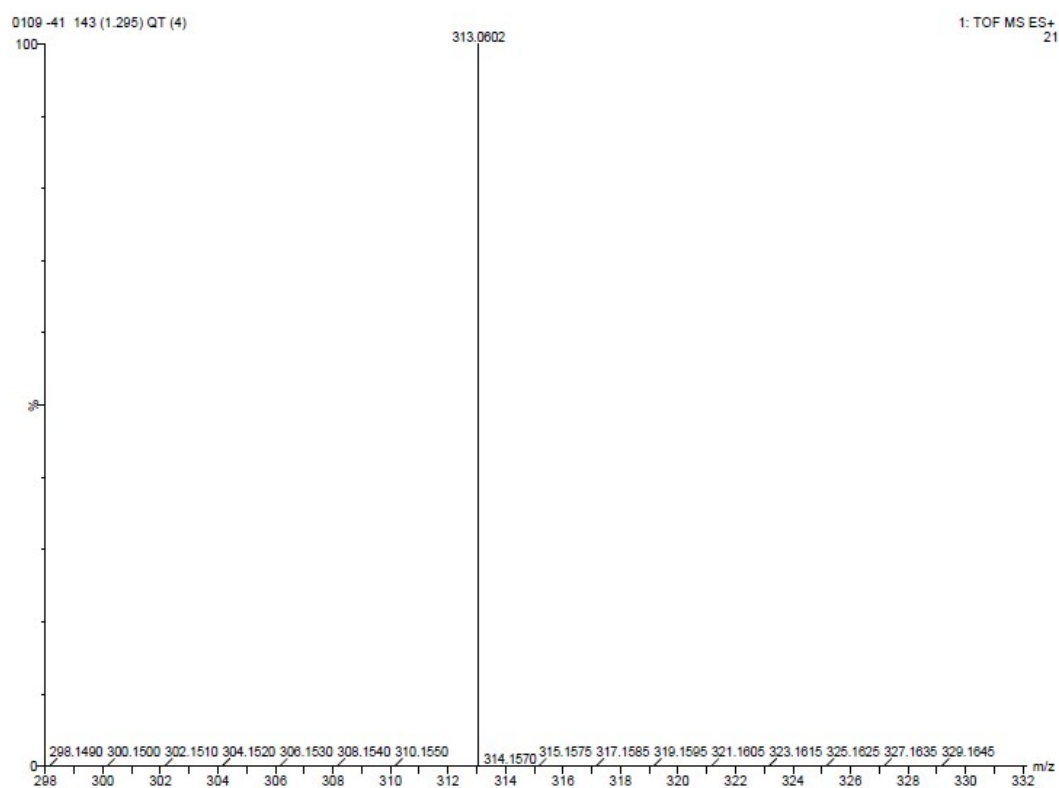

# 2-chloro-2-(perfluorobenzo[d]oxazol-2-yl)aniline (**3p**)

<sup>1</sup>H NMR (400 MHz, DMSO)

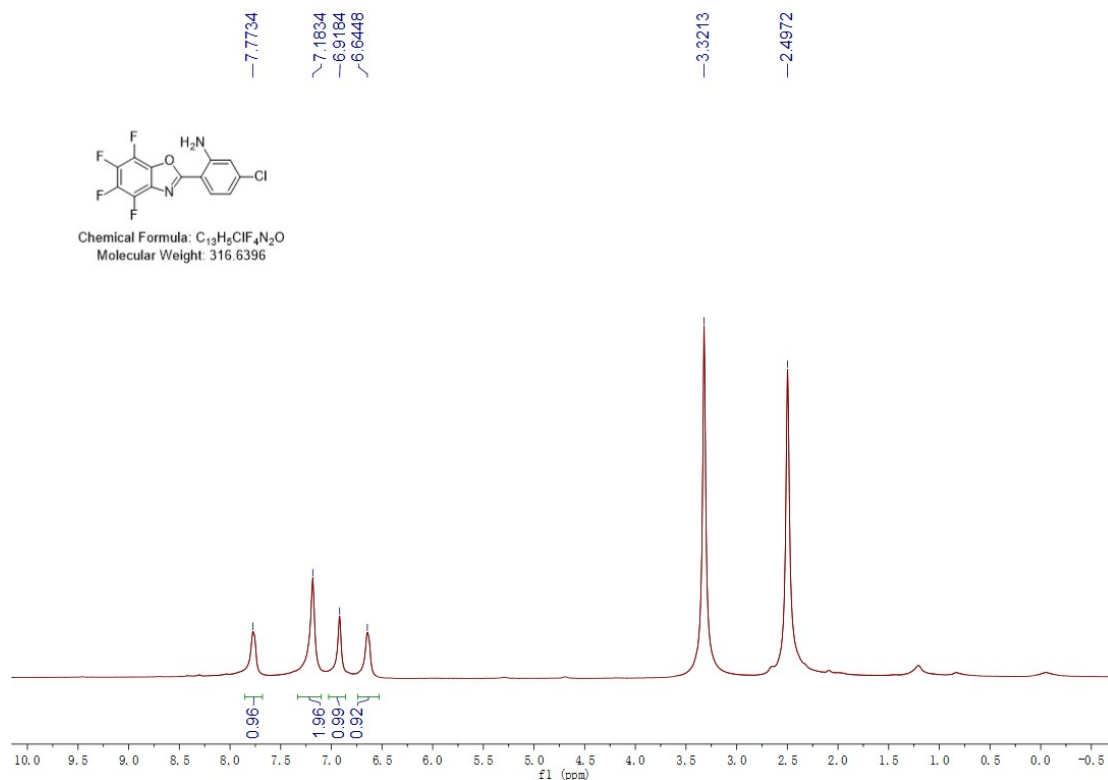

<sup>13</sup>C NMR (101 MHz, DMSO)

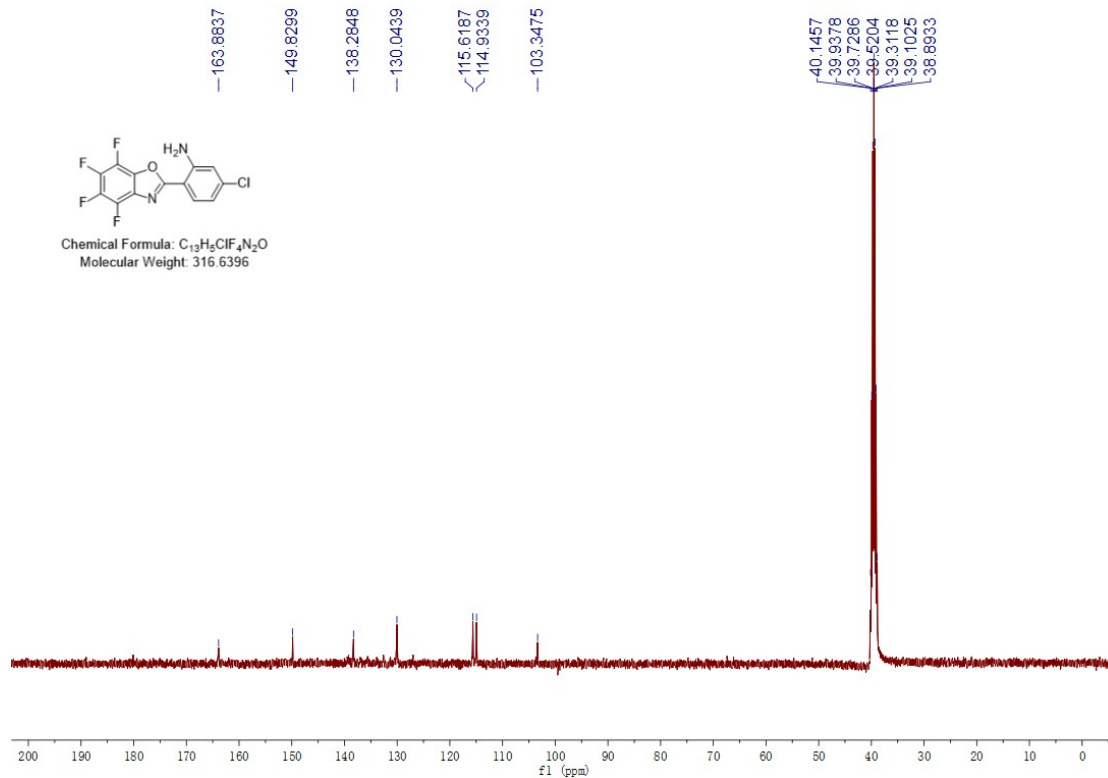

# <sup>19</sup>F NMR (376 MHz, DMSO)

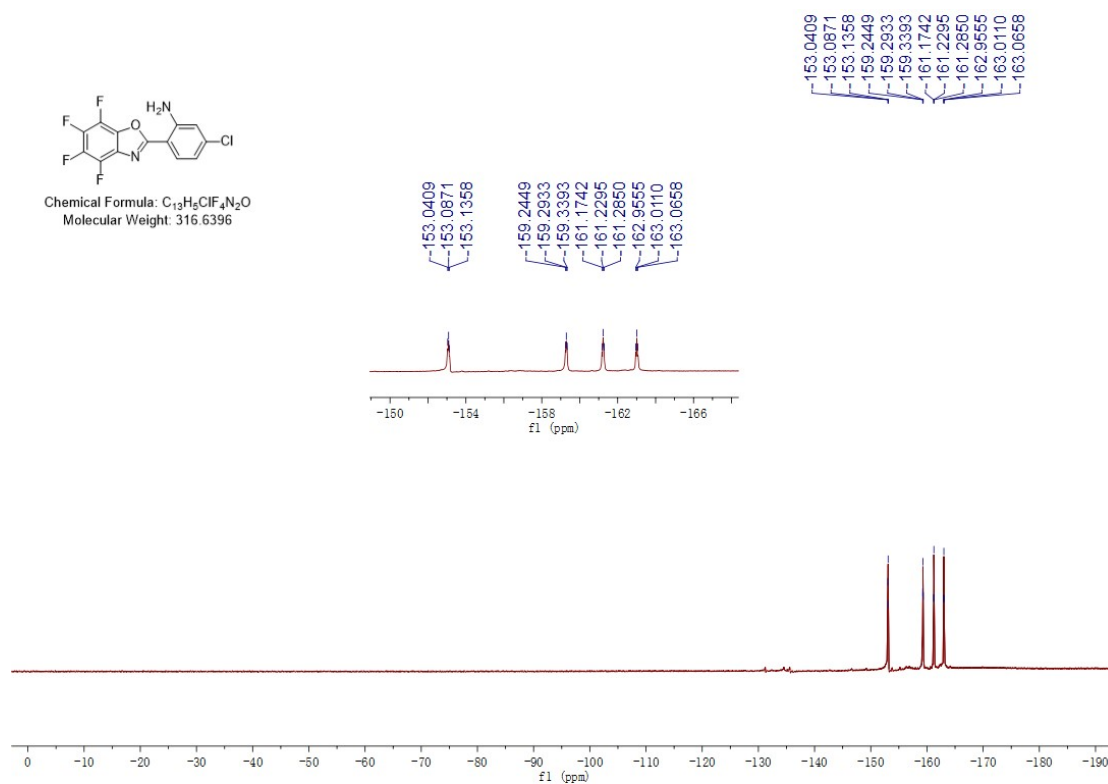

## HRMS spectra

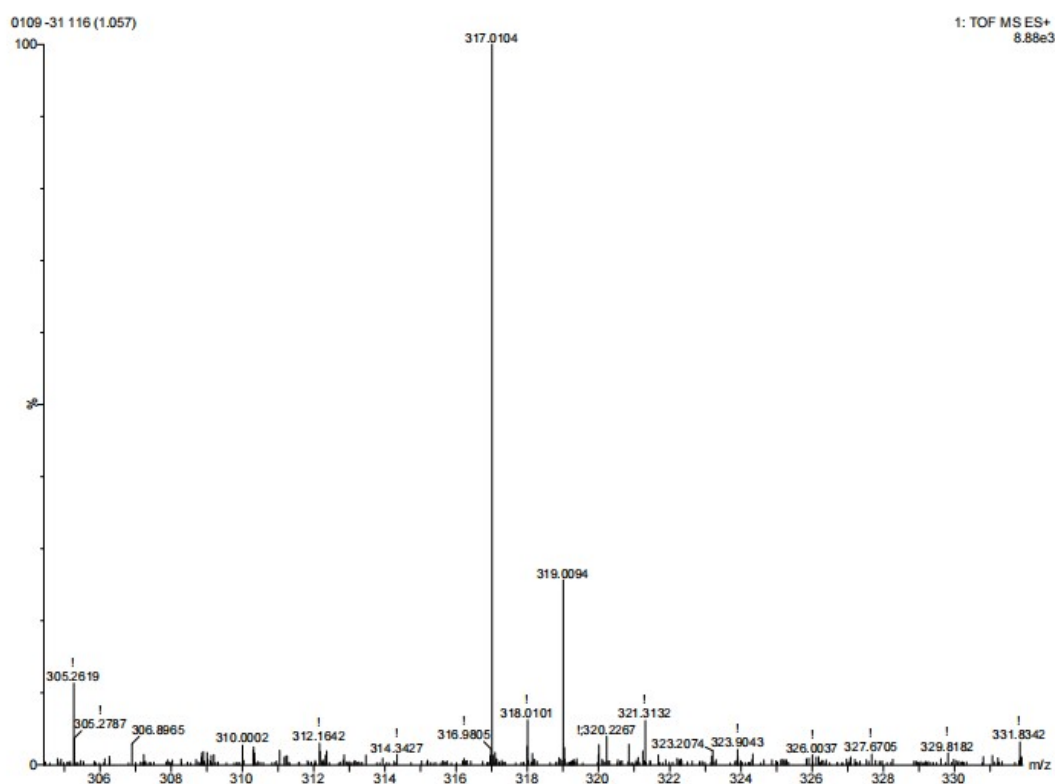

# 2-chloro-5-(perfluorobenzo[d]oxazol-2-yl)aniline (**3q**)

<sup>1</sup>H NMR (400 MHz, DMSO)

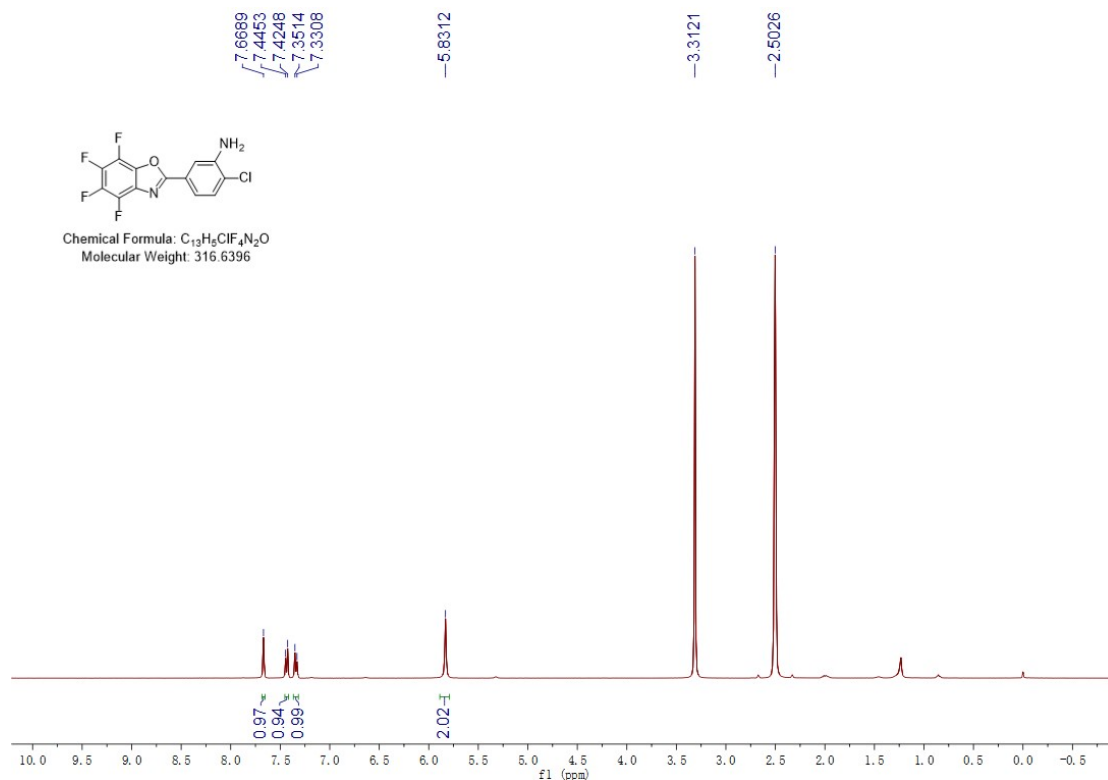

<sup>13</sup>C NMR (101 MHz, DMSO)

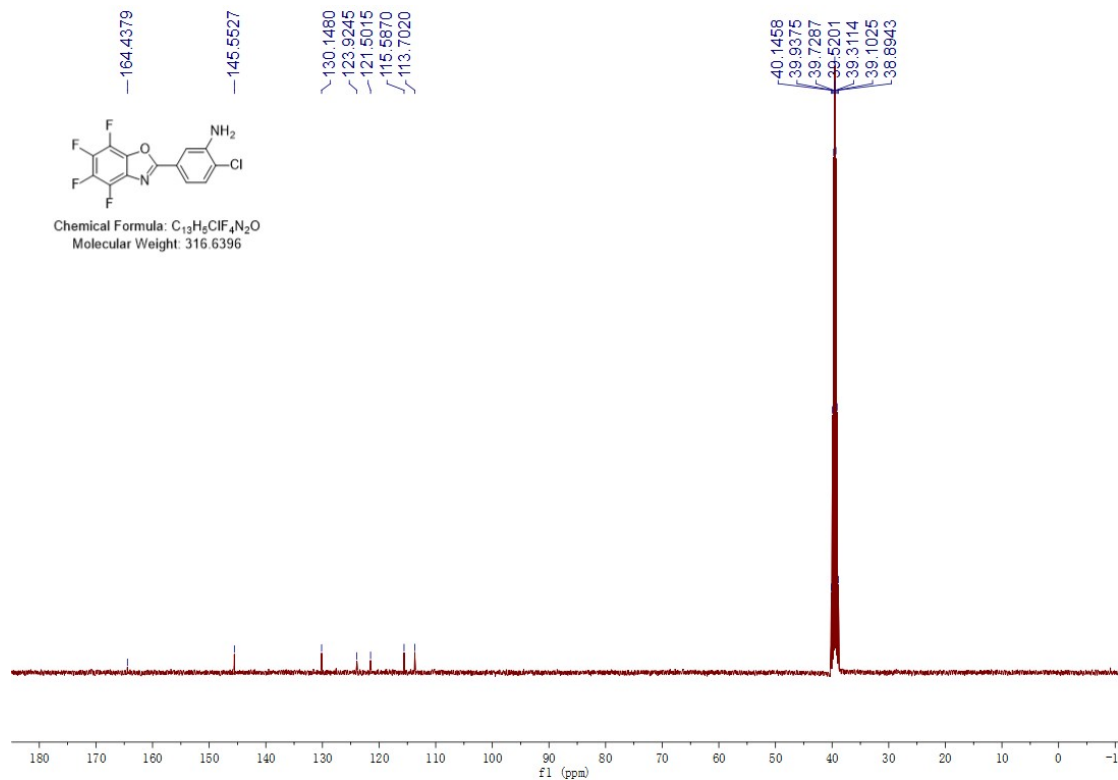

# <sup>19</sup>F NMR (376 MHz, DMSO)

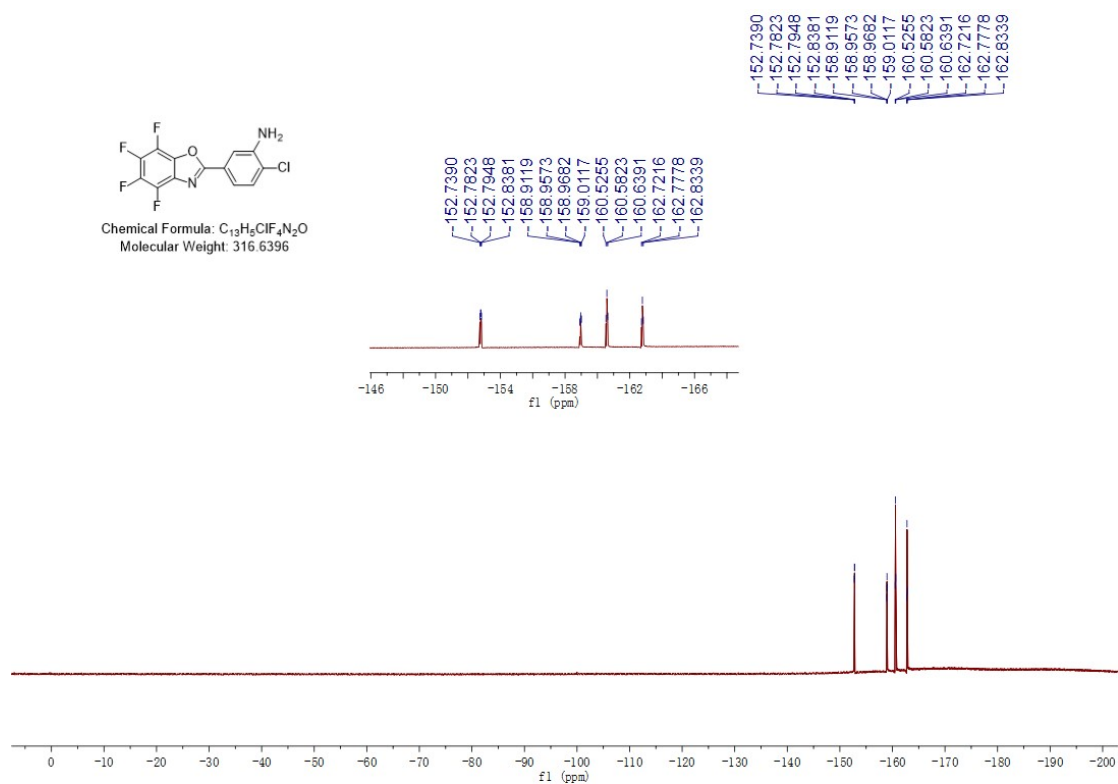

## HRMS spectra

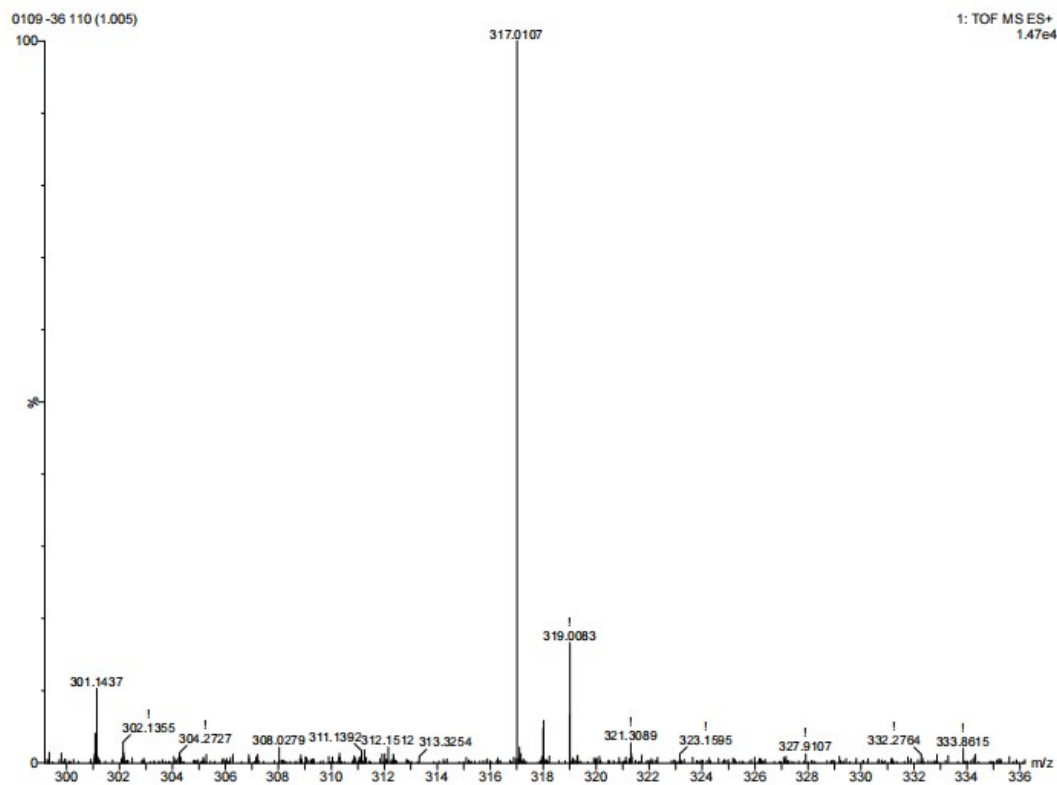

# 2-chloro-2-(perfluorobenzo[d]oxazol-2-yl)aniline (**3r**)

<sup>1</sup>H NMR (400 MHz, DMSO)

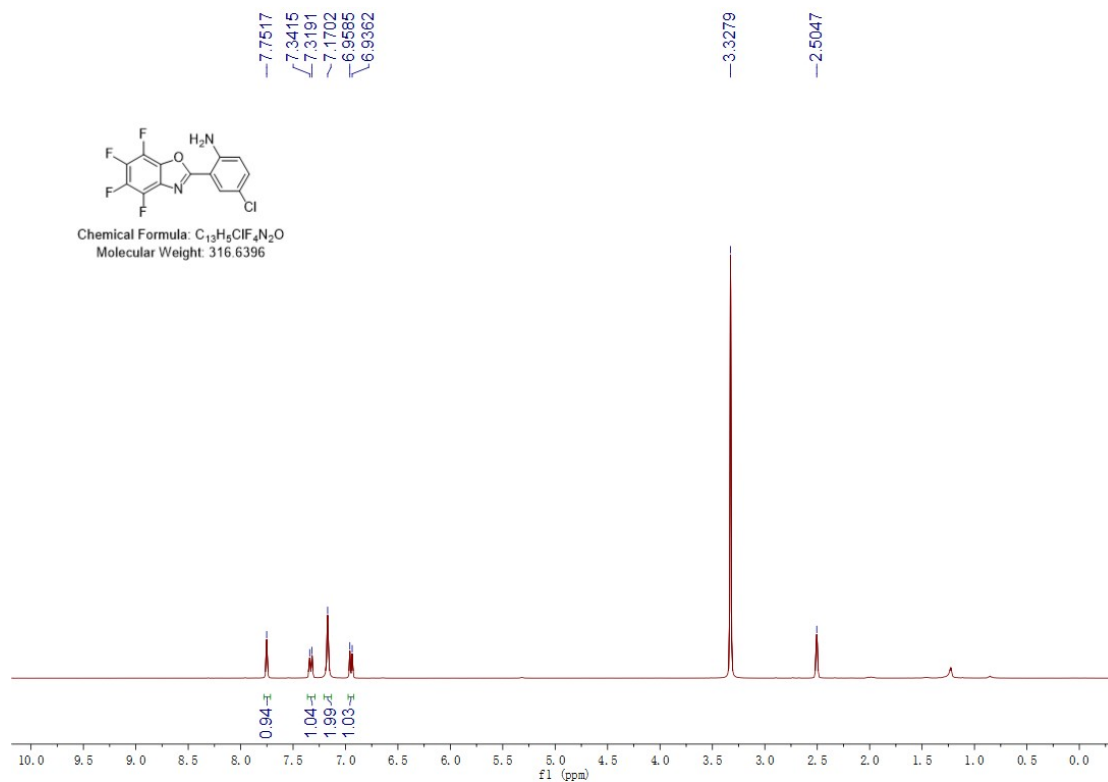

<sup>13</sup>C NMR (101 MHz, DMSO)

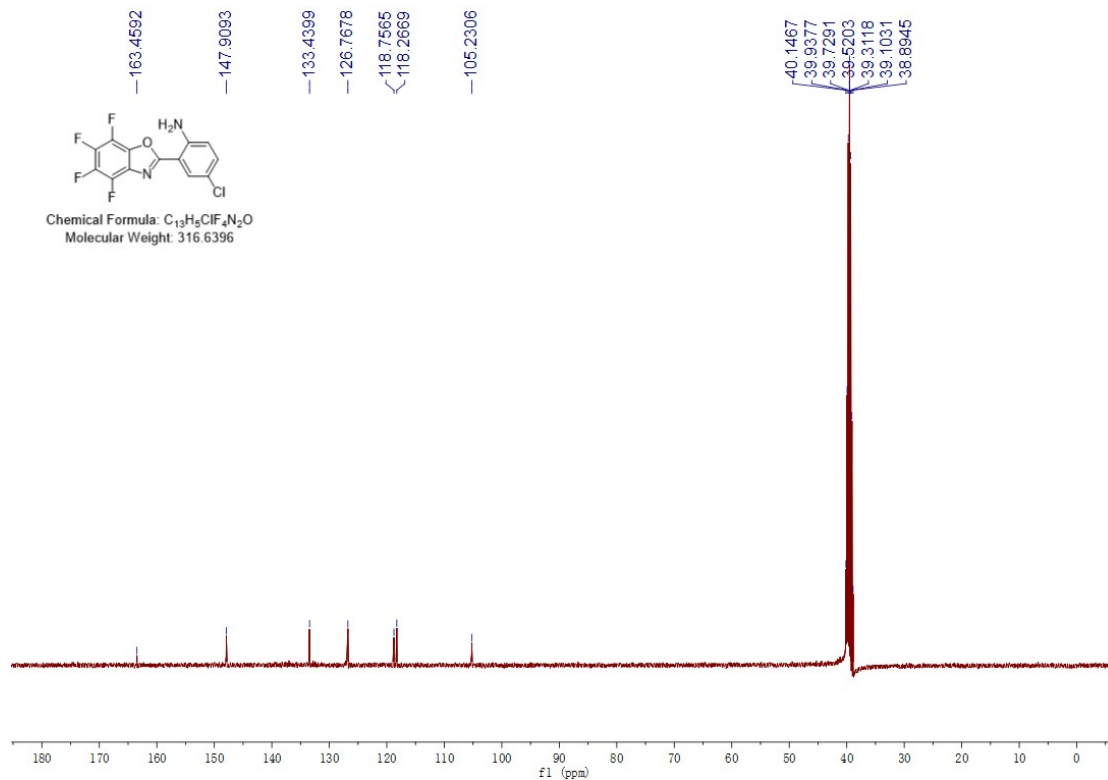

# <sup>19</sup>F NMR (376 MHz, DMSO)

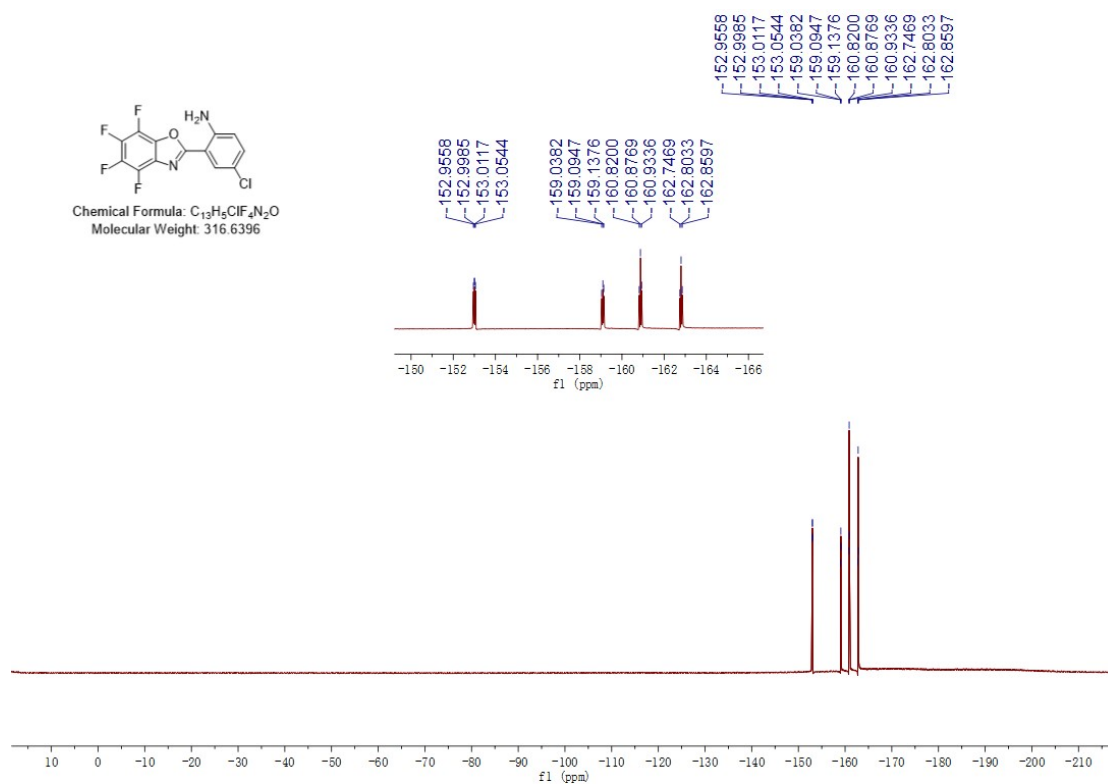

## HRMS spectra

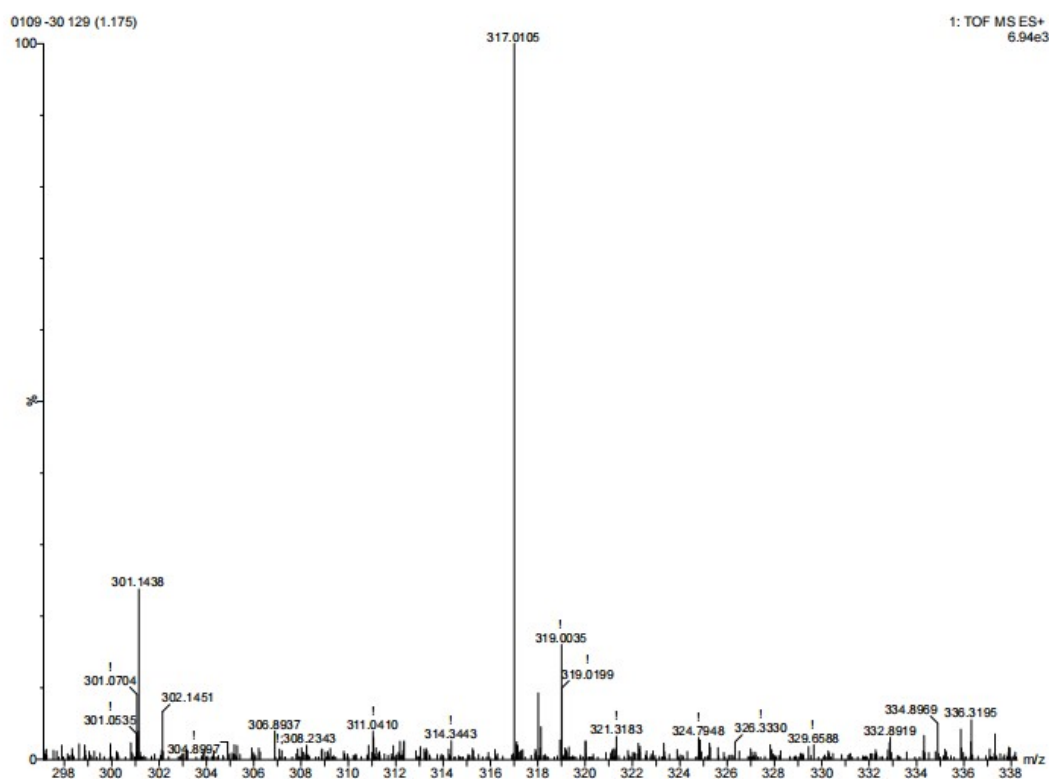

## 2-fluoro-2-(perfluorobenzo[d]oxazol-2-yl)aniline (**3s**)

$^1\text{H}$  NMR (400 MHz, DMSO)

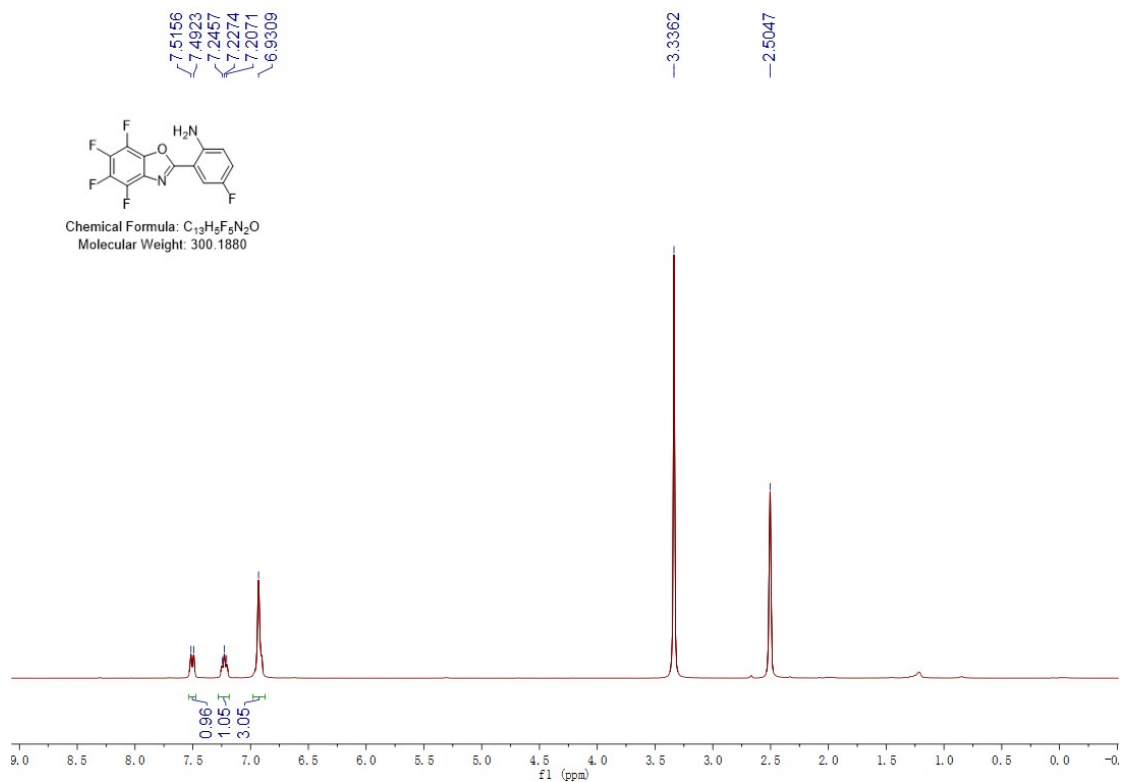

$^{13}\text{C}$  NMR (101 MHz, DMSO)

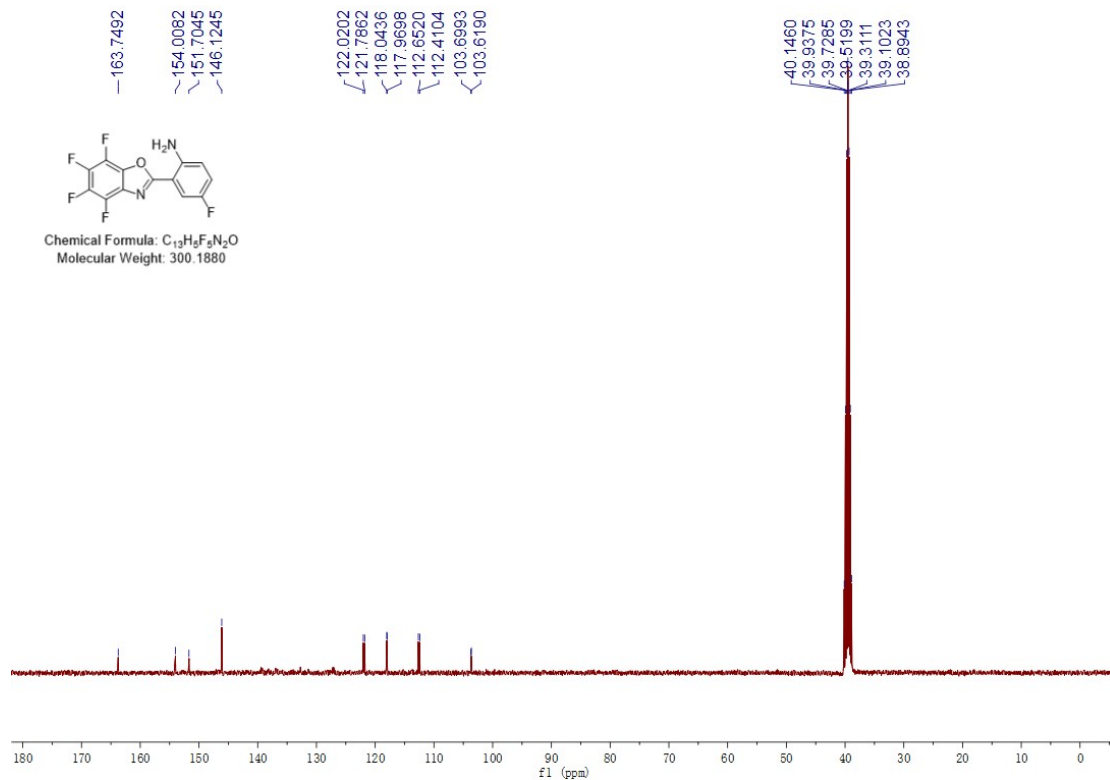

# <sup>19</sup>F NMR (376 MHz, DMSO)

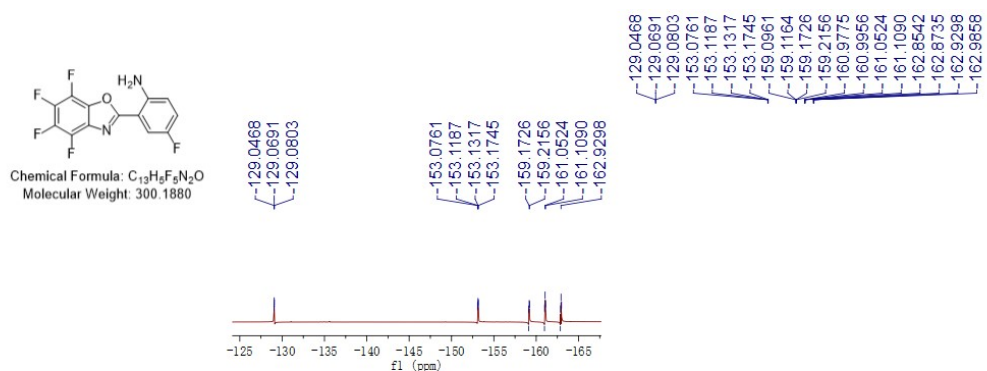

## HRMS spectra

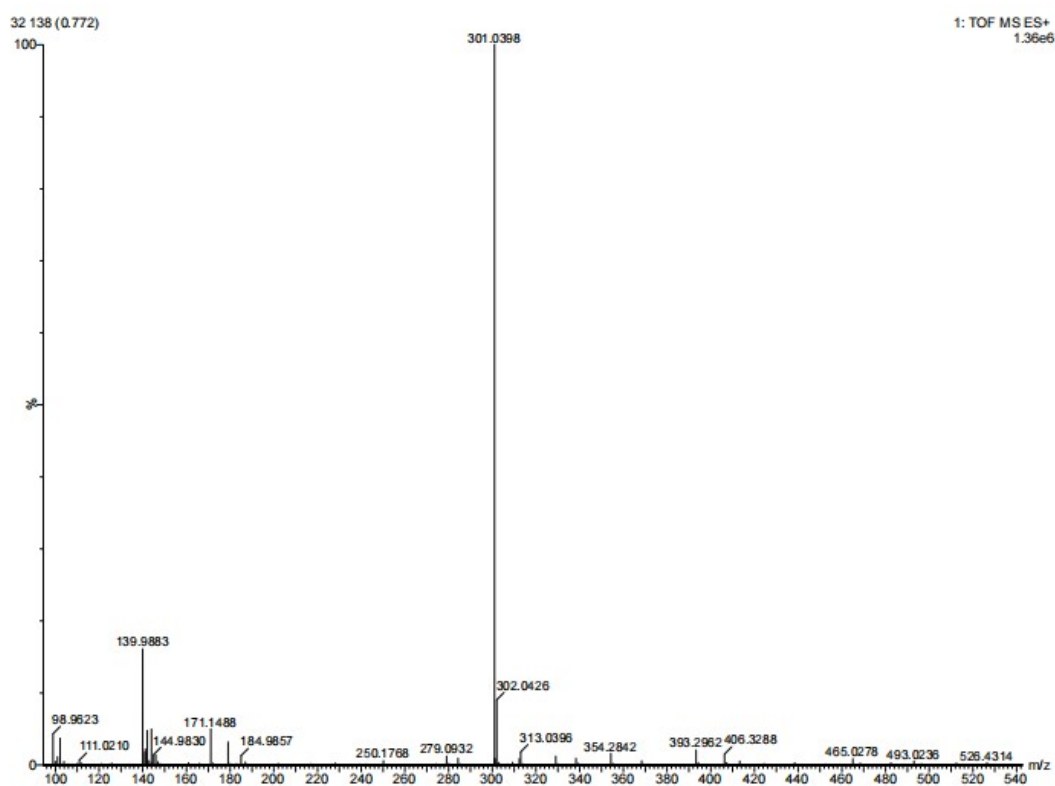

## 2-bromo-2-(perfluorobenzo[d]oxazol-2-yl)aniline (**3t**)

$^1\text{H}$  NMR (400 MHz, DMSO)

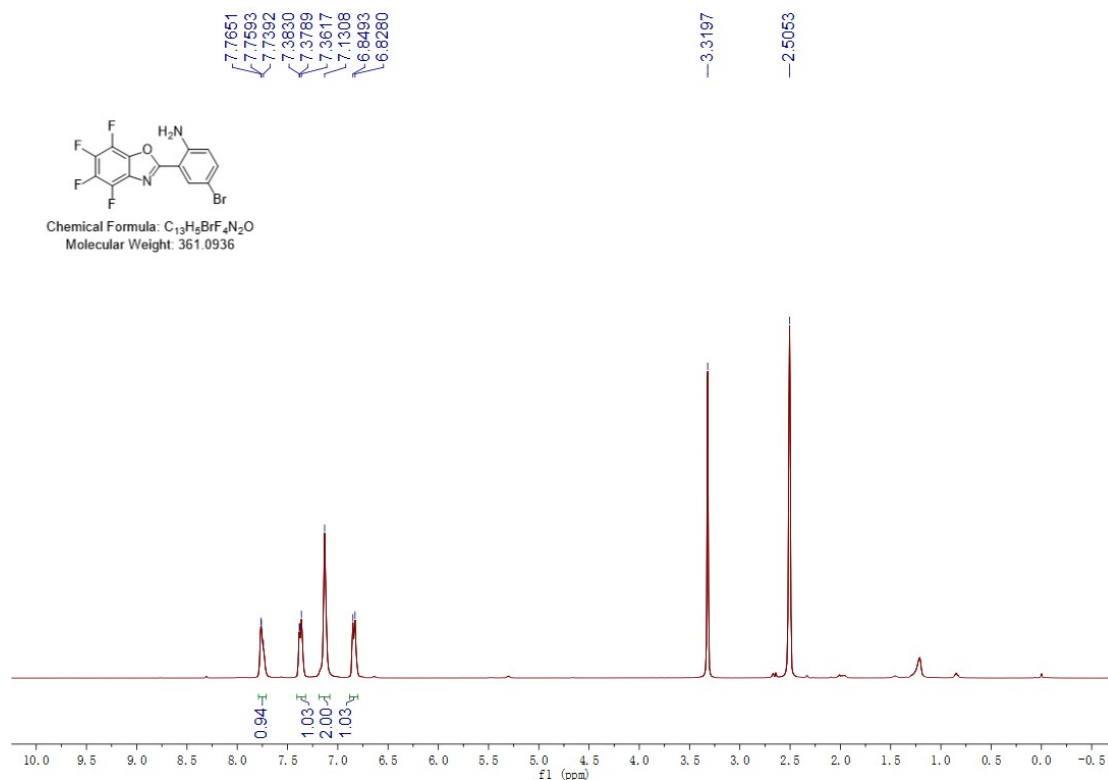

$^{13}\text{C}$  NMR (101 MHz, DMSO)

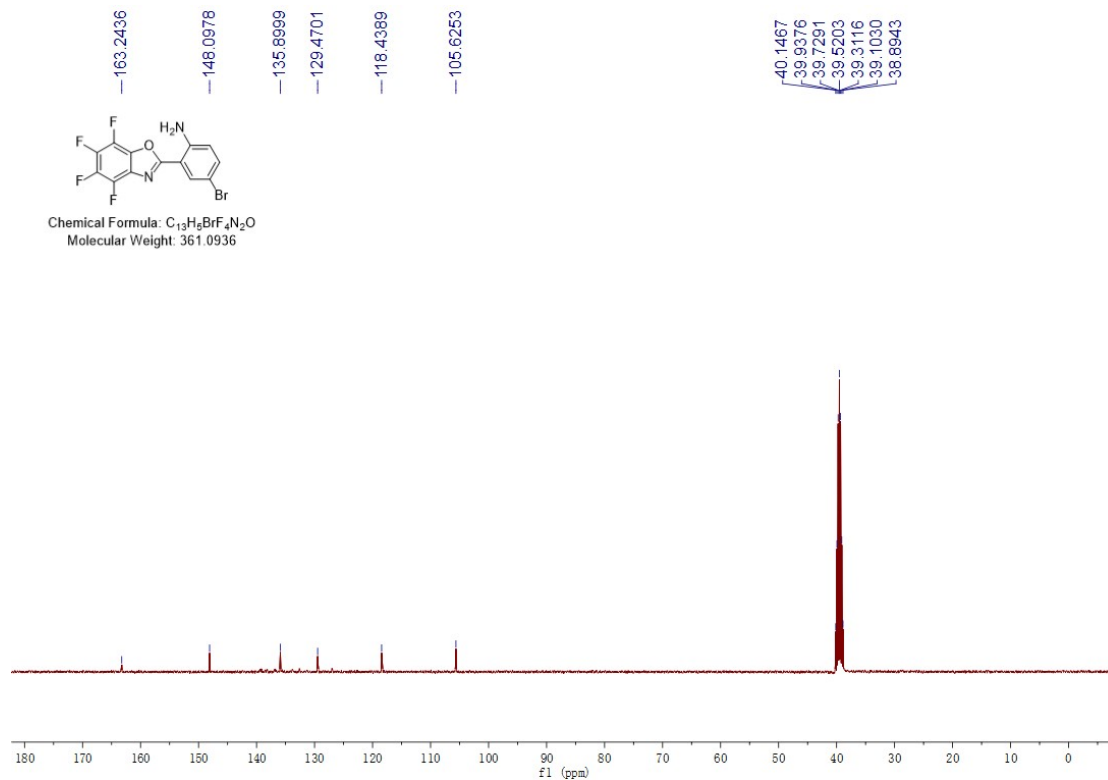

$^{19}\text{F}$  NMR (376 MHz, DMSO)

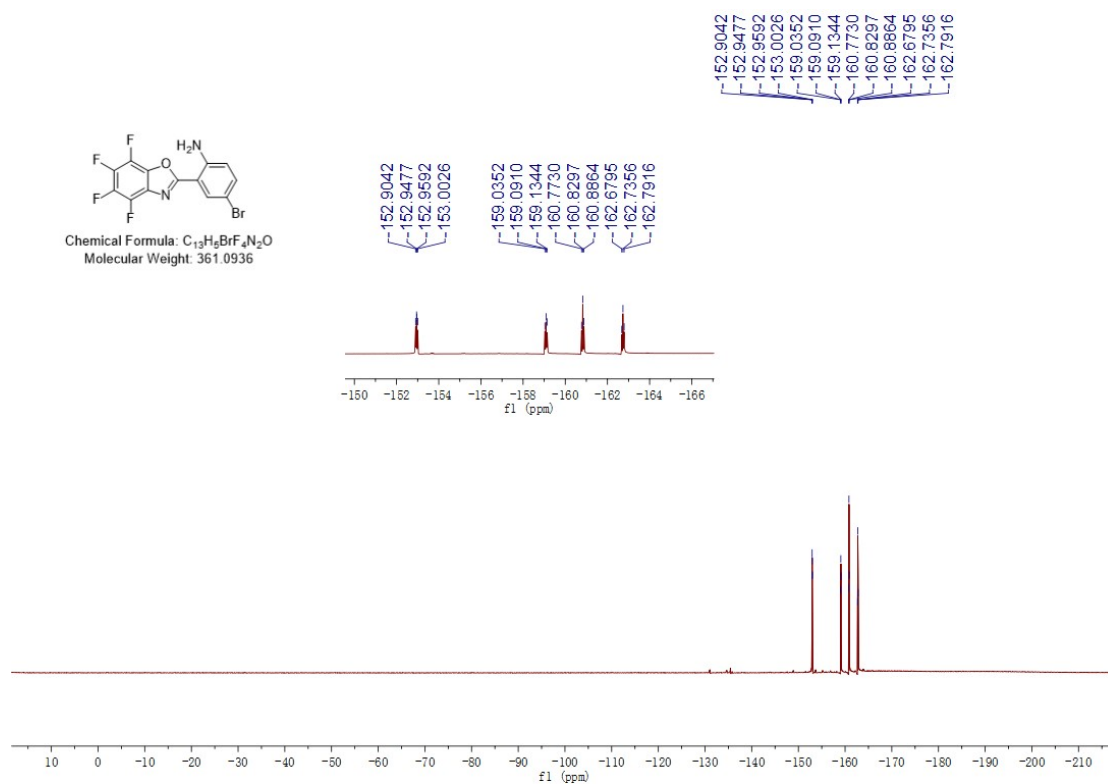

HRMS spectra

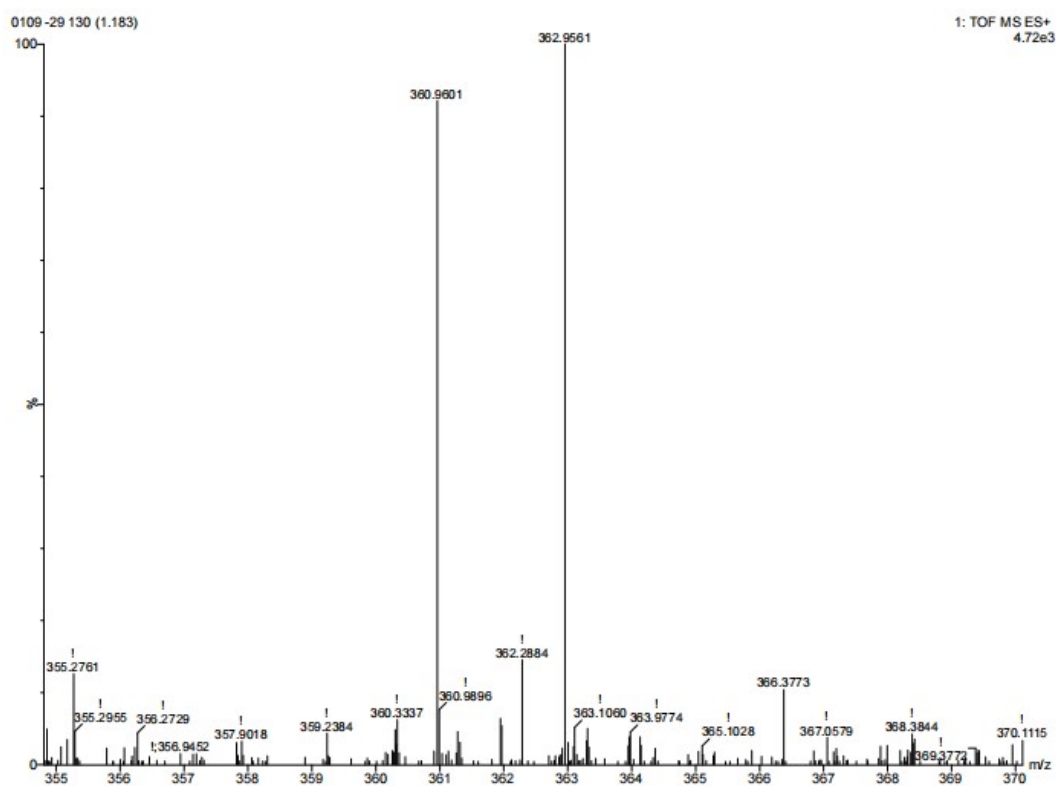

# 2-nitro-2-(perfluorobenzo[d]oxazol-2-yl)aniline (**3u**)

<sup>1</sup>H NMR (400 MHz, DMSO)

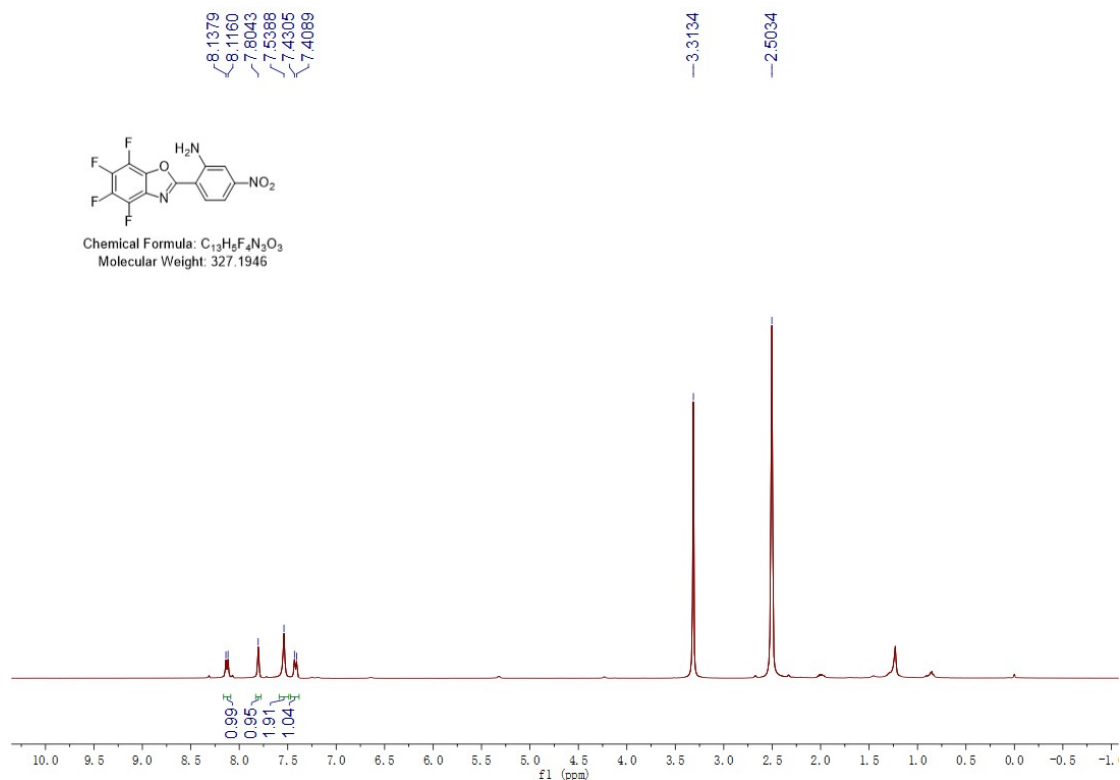

<sup>13</sup>C NMR (101 MHz, DMSO)

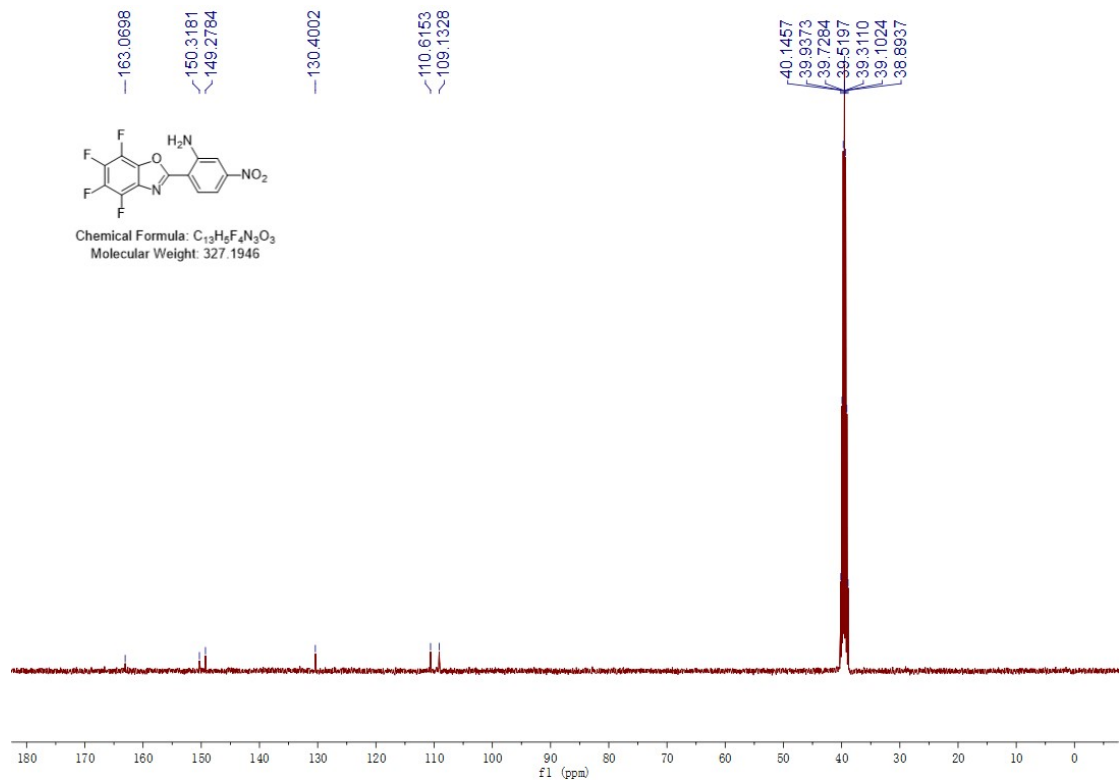

# <sup>19</sup>F NMR (376 MHz, DMSO)

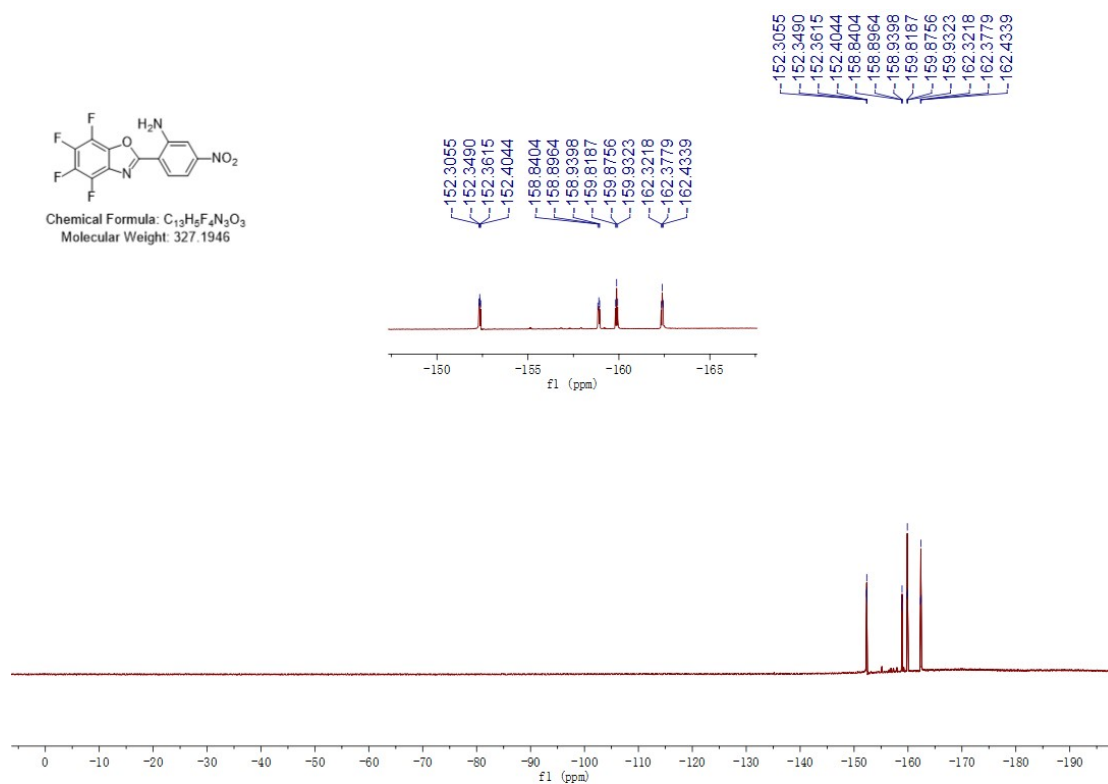

## HRMS spectra

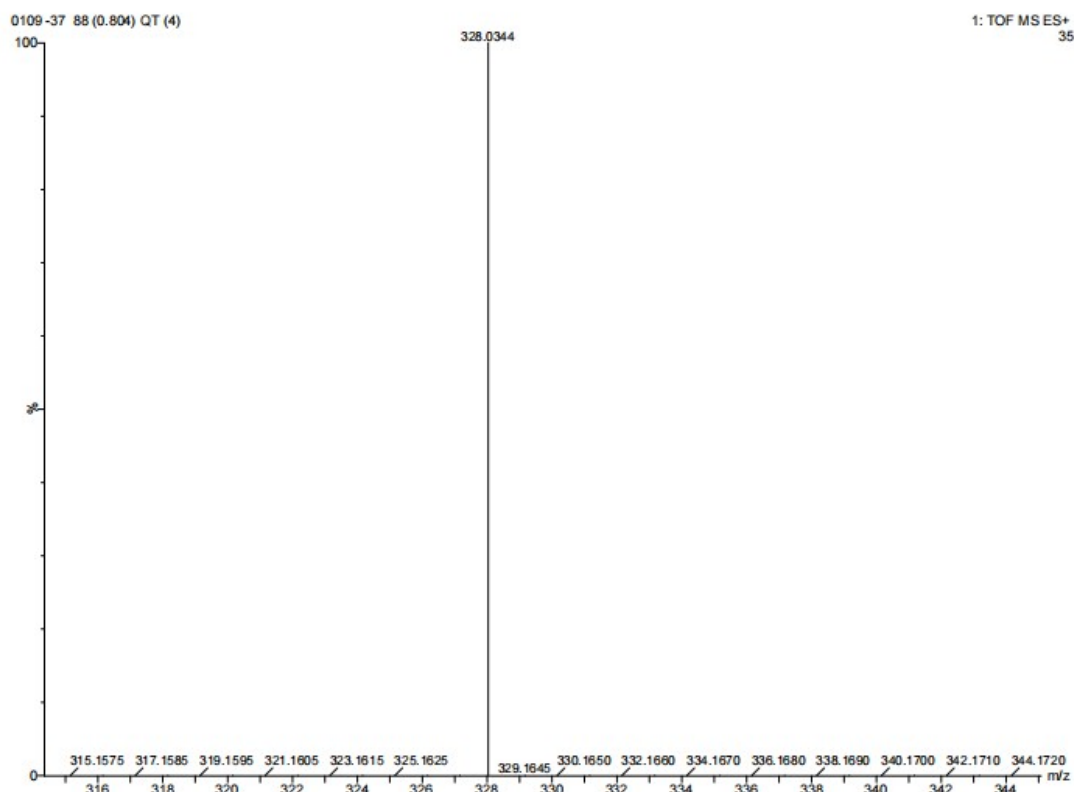

## 2-(perfluorobenzo[d]oxazol-2-yl)phenol (**3v**)

$^1\text{H}$  NMR (400 MHz, DMSO)

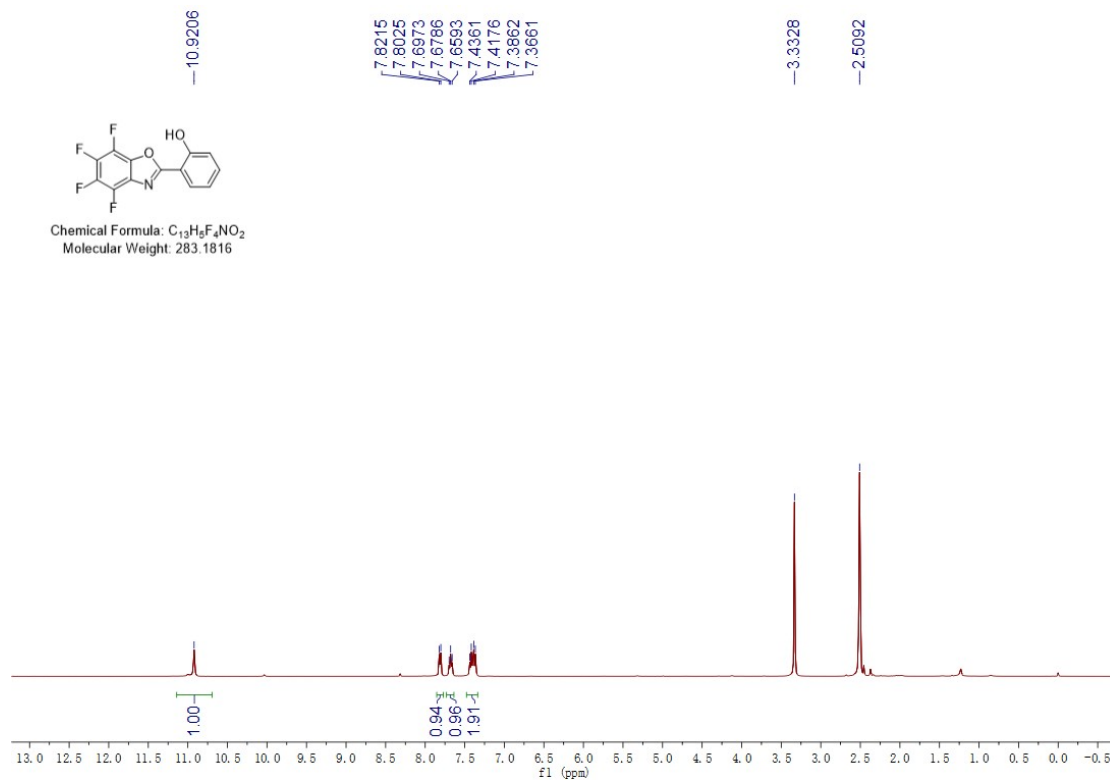

$^{13}\text{C}$  NMR (101 MHz, DMSO)

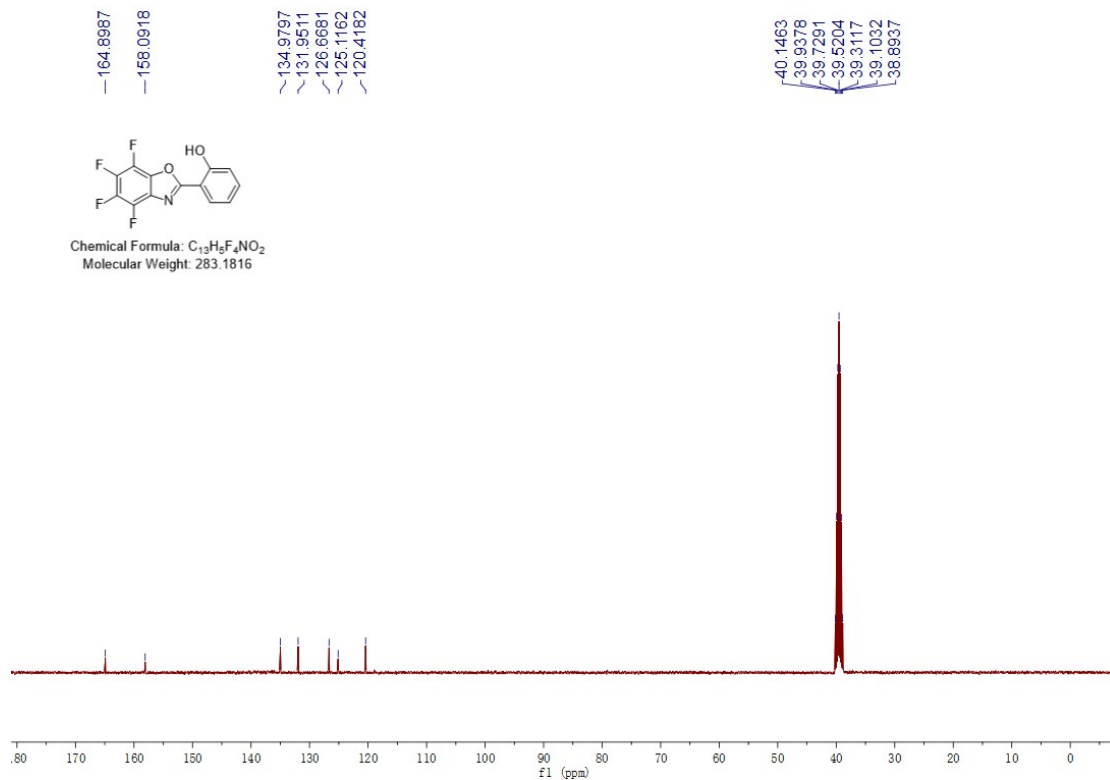

# <sup>19</sup>F NMR (376 MHz, DMSO)

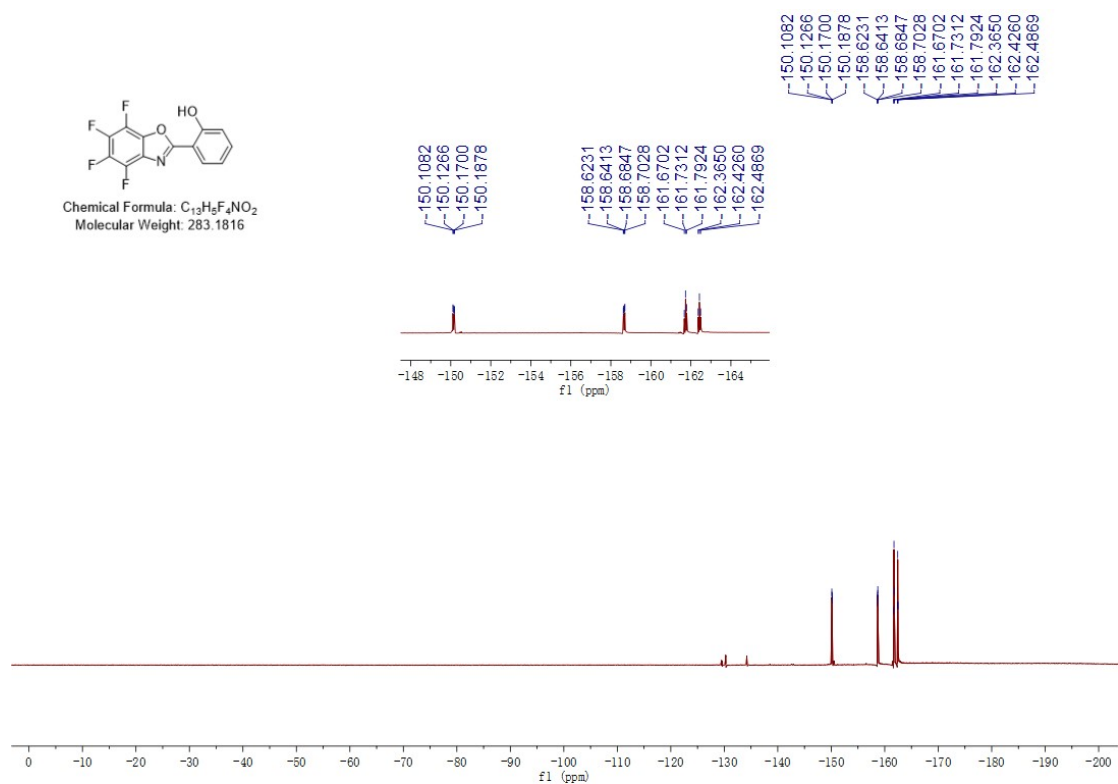

## HRMS spectra

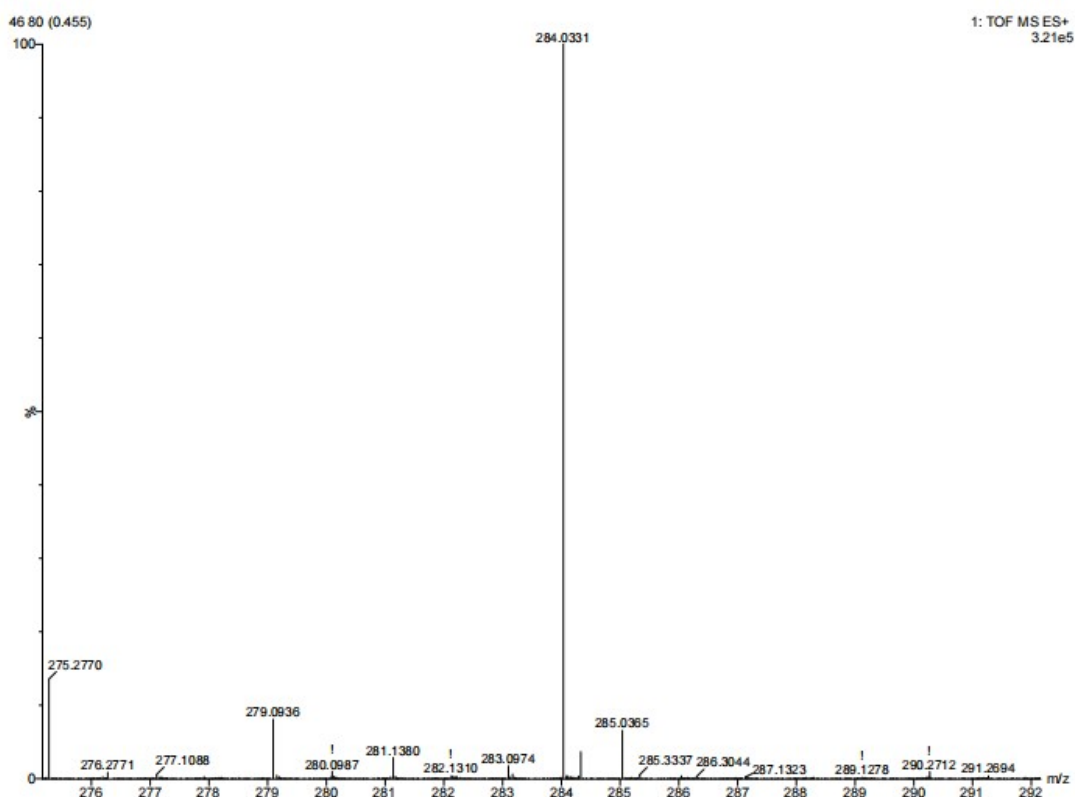

# 2-bromo-2-(perfluorobenzo[d]oxazol-2-yl)phenol (**3w**)

<sup>1</sup>H NMR (400 MHz, DMSO)

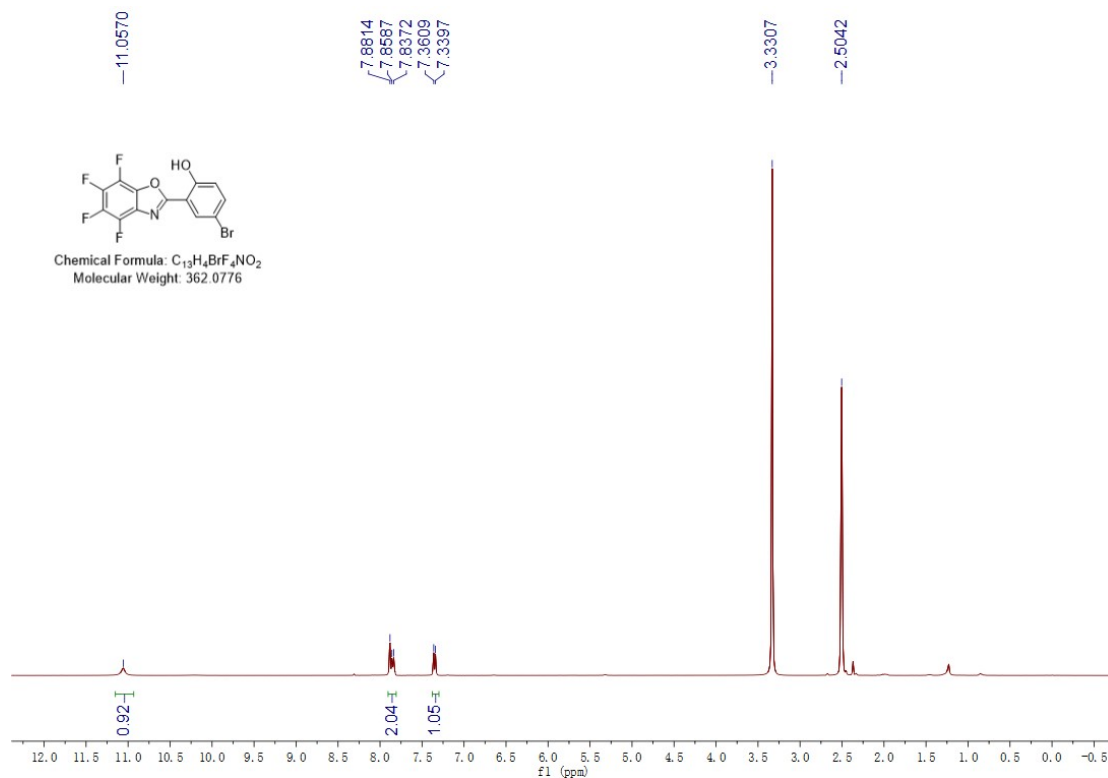

<sup>13</sup>C NMR (101 MHz, DMSO)

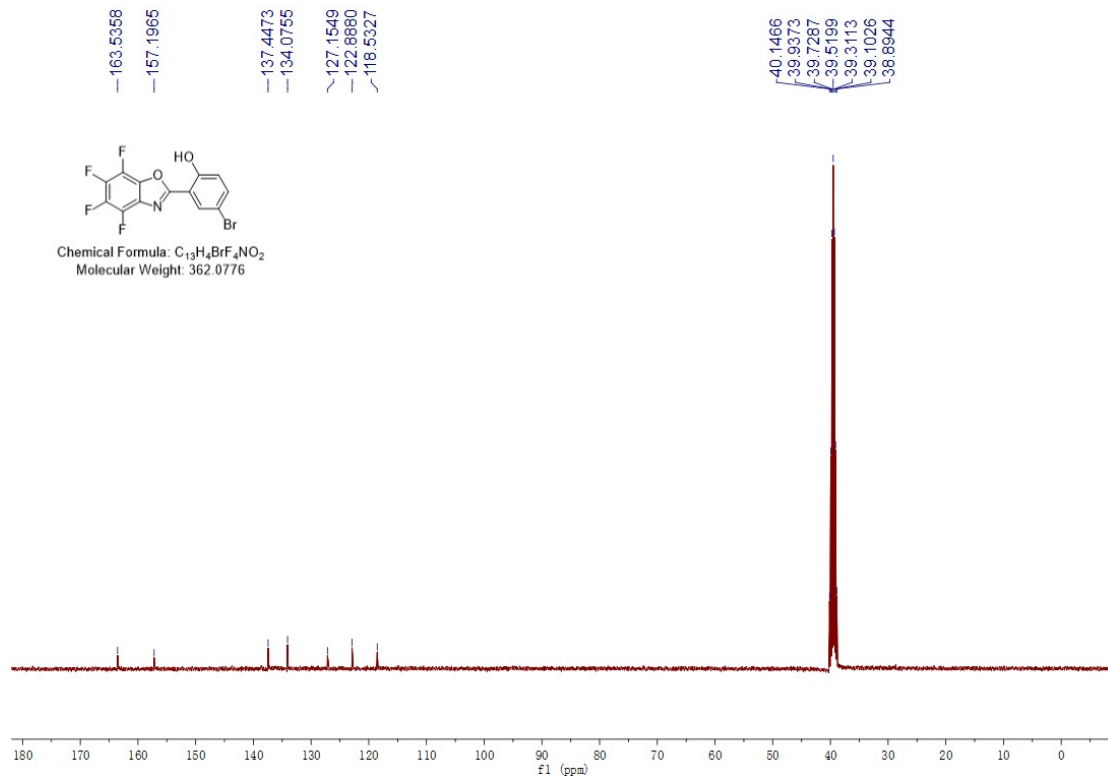

<sup>19</sup>F NMR (376 MHz, DMSO)

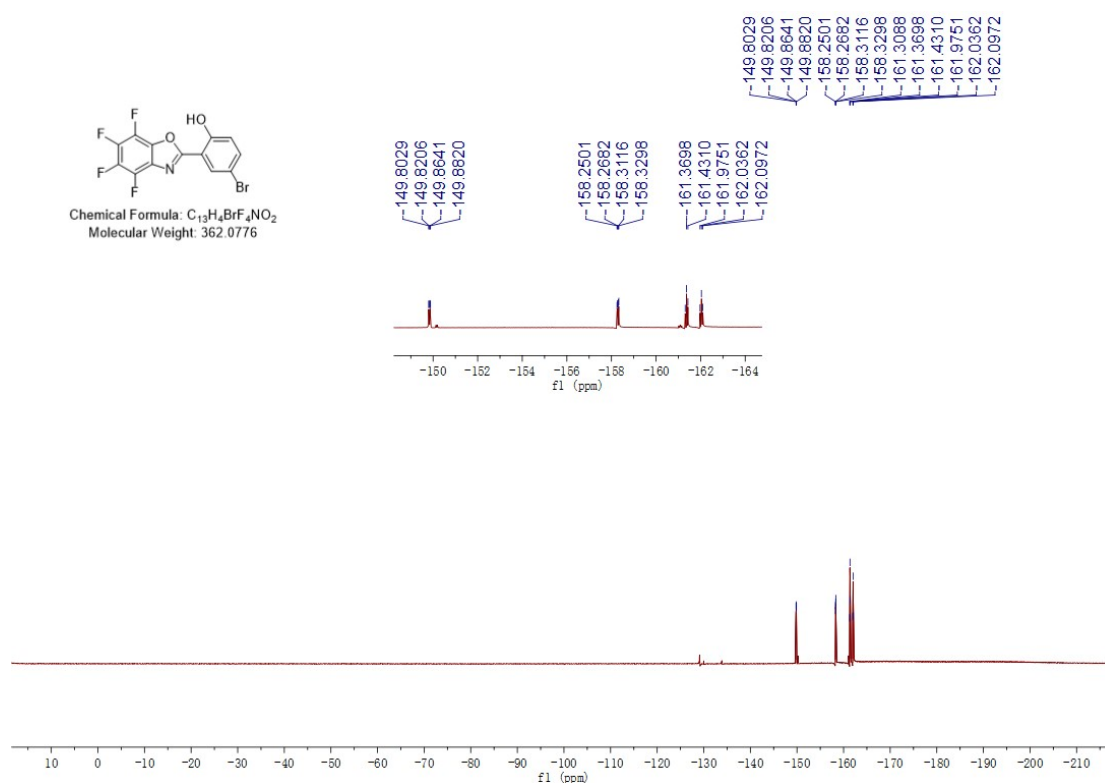

HRMS spectra

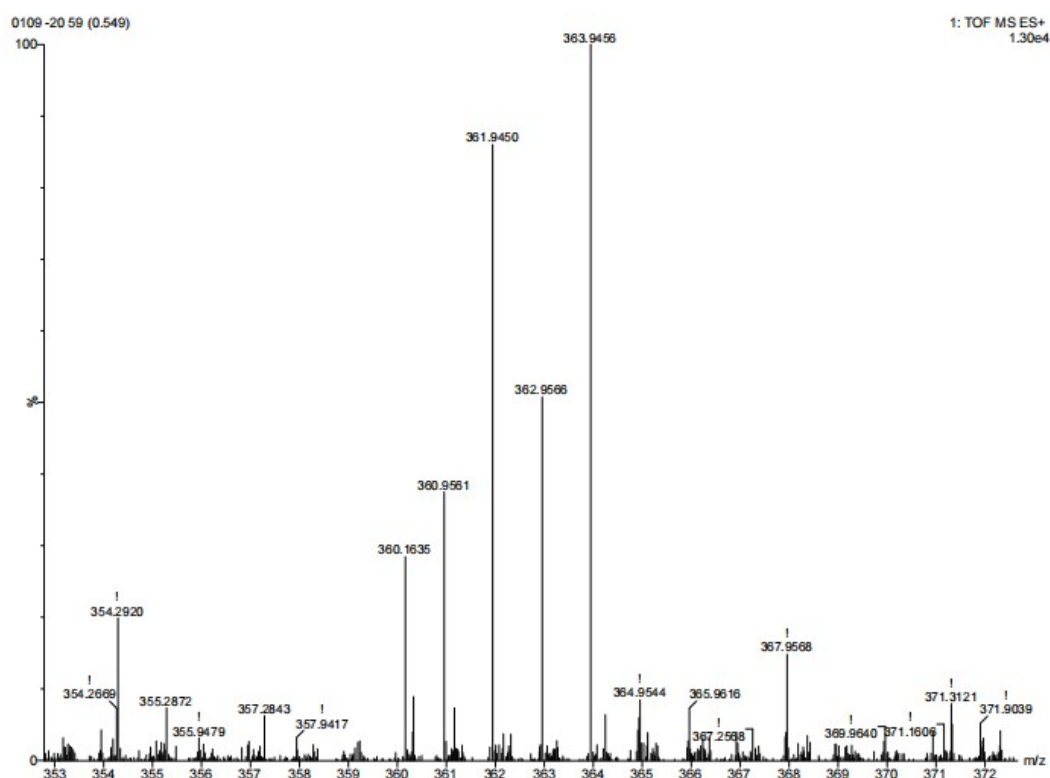

# 4,5,6,7-tetrafluoro-2-(pyridin-2-yl)benzo[d]oxazole (**3x**)

<sup>1</sup>H NMR (400 MHz, DMSO)

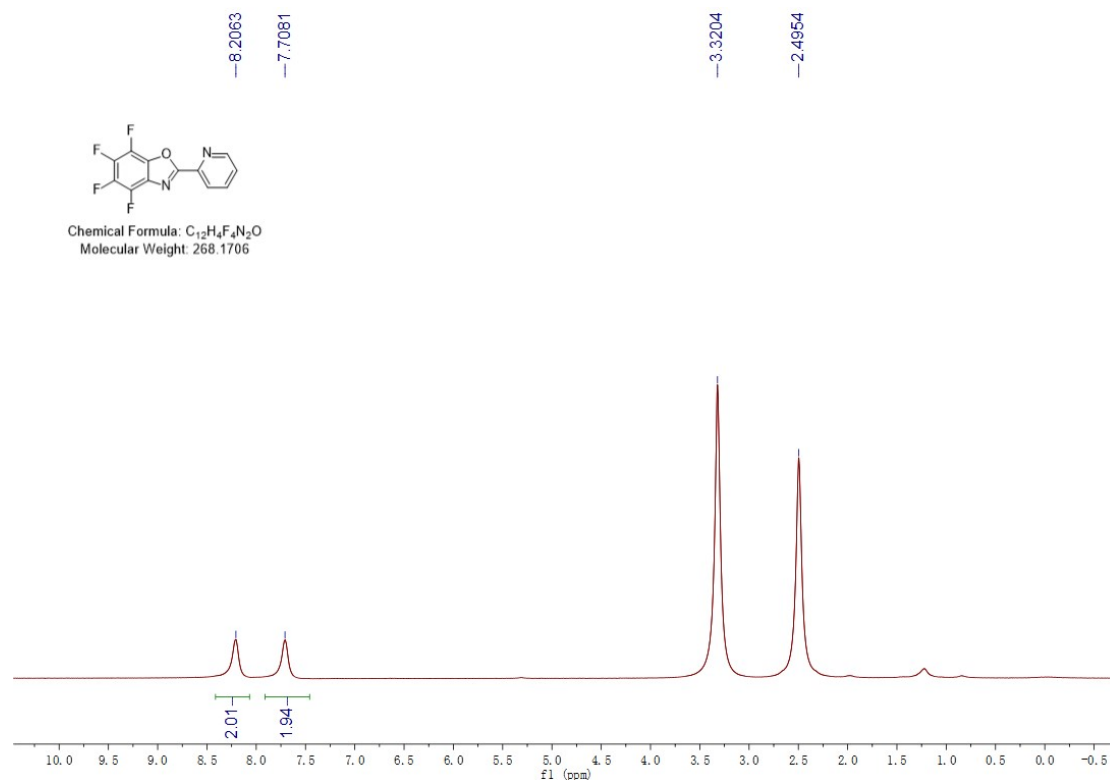

<sup>13</sup>C NMR (101 MHz, DMSO)

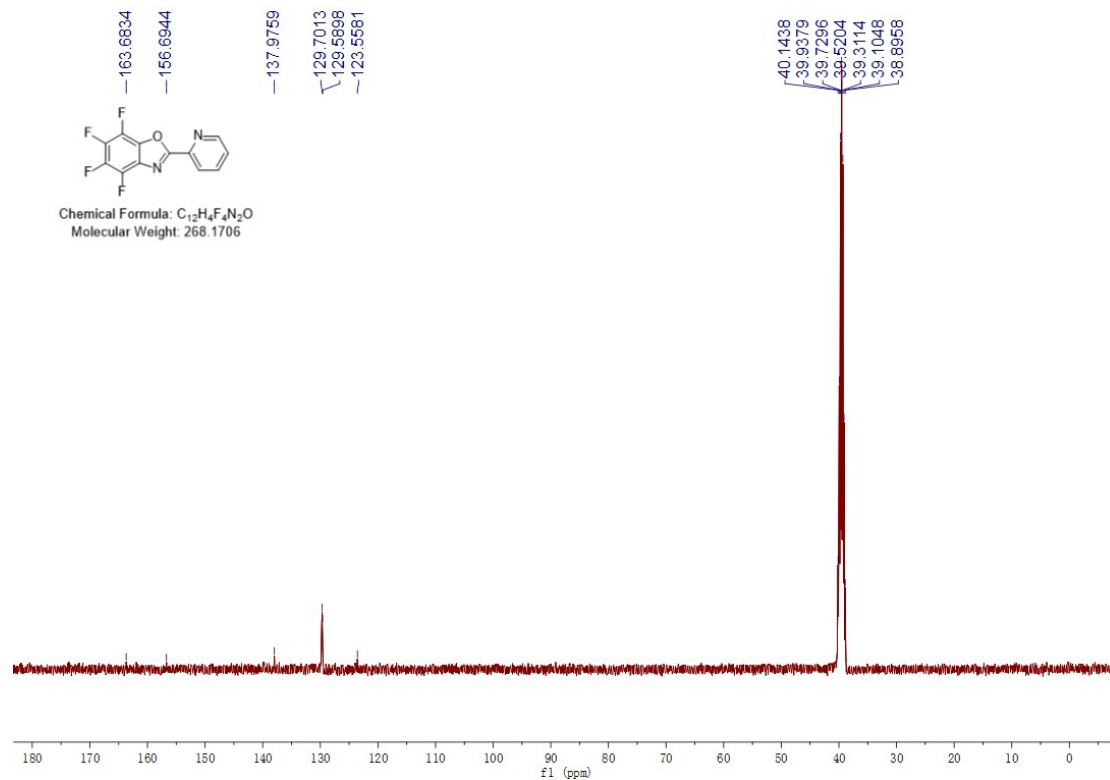

<sup>19</sup>F NMR (376 MHz, DMSO)

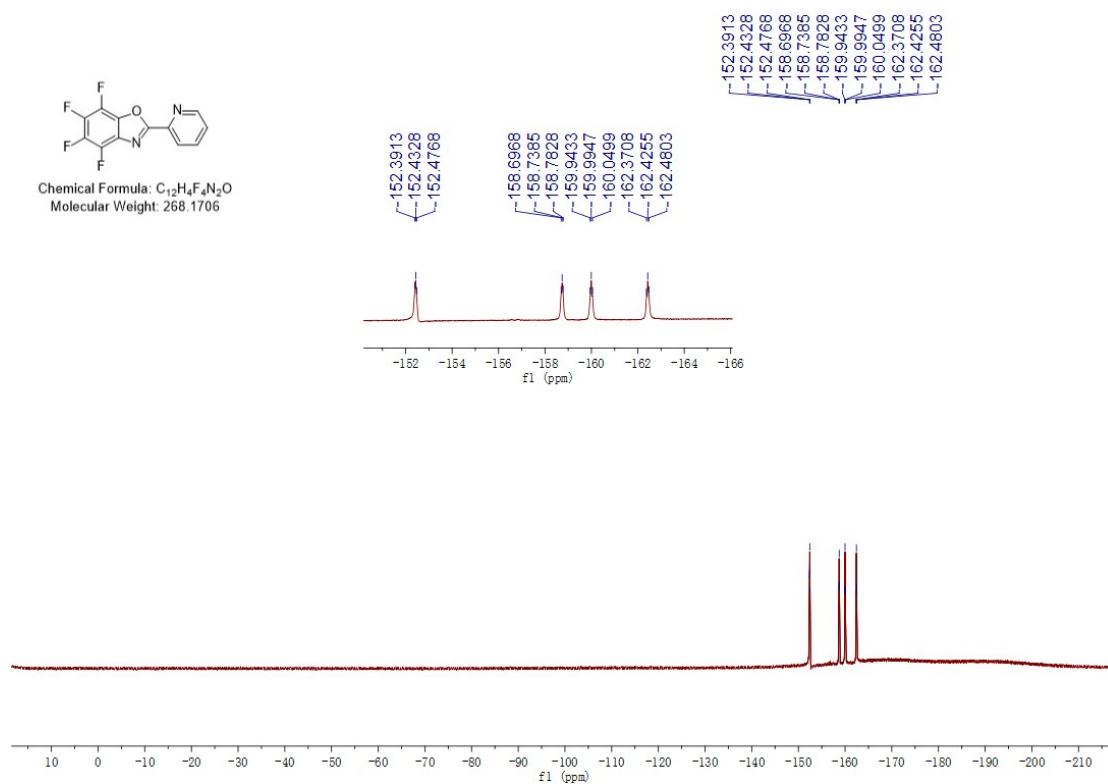

HRMS spectra

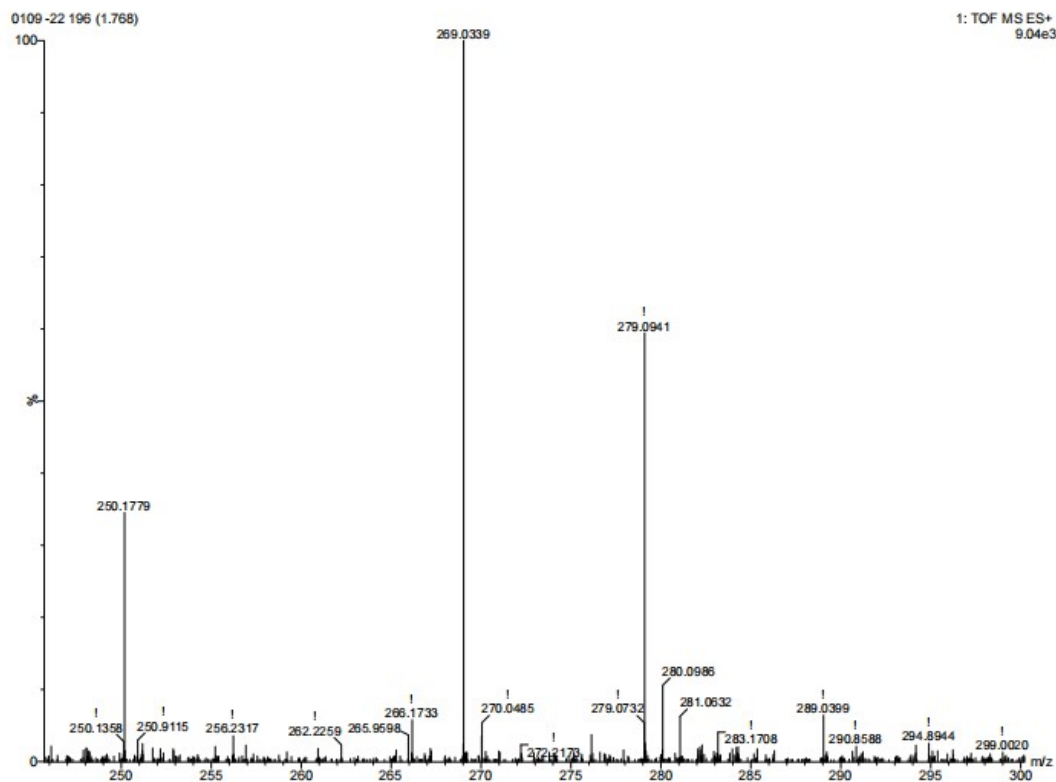

*N*-methyl-2-(perfluorobenzo[d]oxazol-2-yl)aniline (**4a**)

<sup>1</sup>H NMR (400 MHz, CDCl<sub>3</sub>)

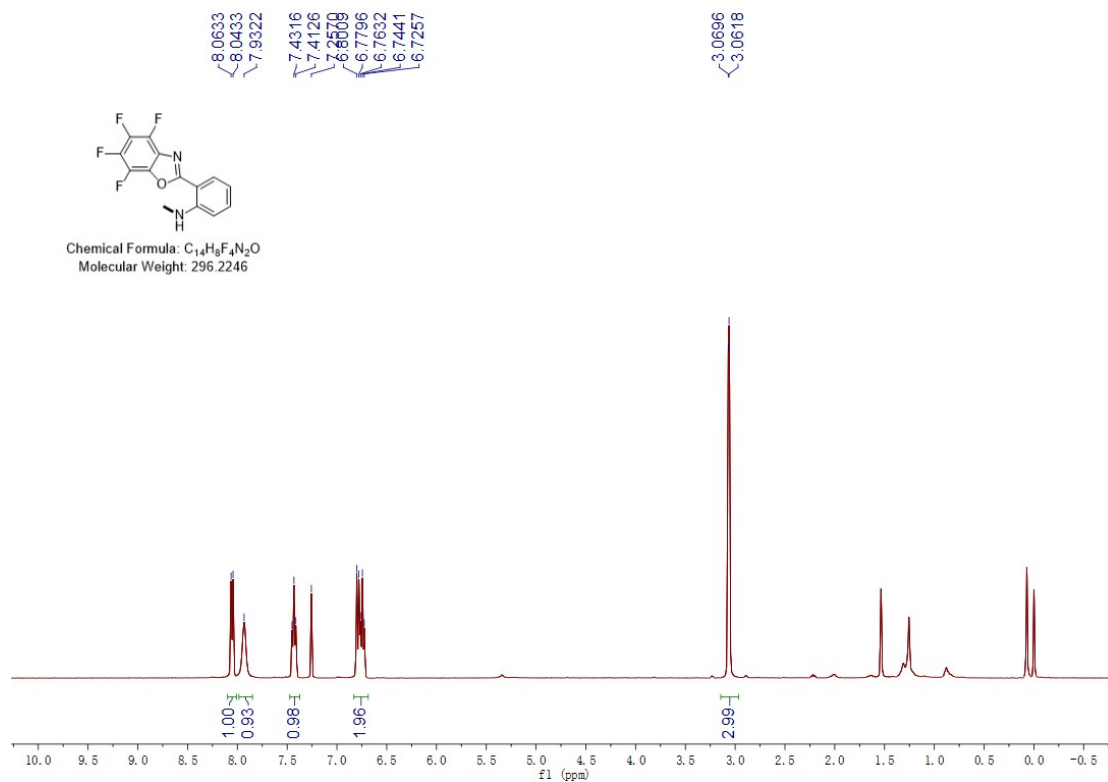

<sup>13</sup>C NMR (101 MHz, CDCl<sub>3</sub>)

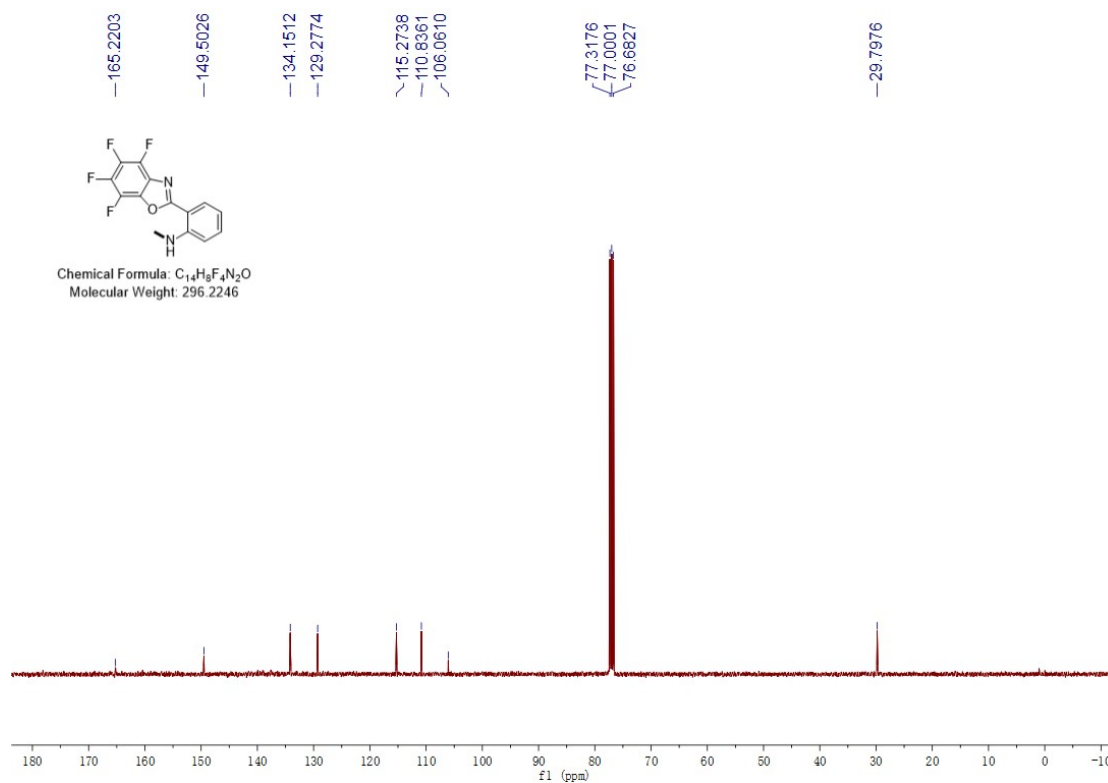

$^{19}\text{F}$  NMR (376 MHz,  $\text{CDCl}_3$ )

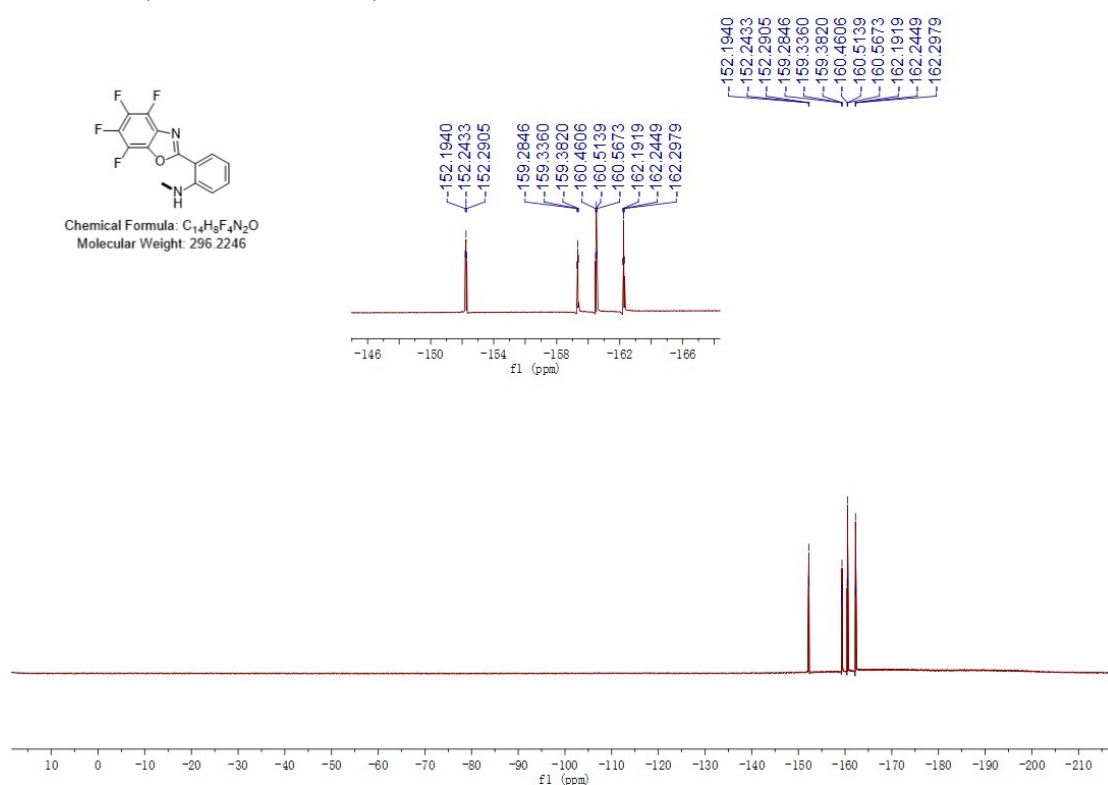

HRMS spectra

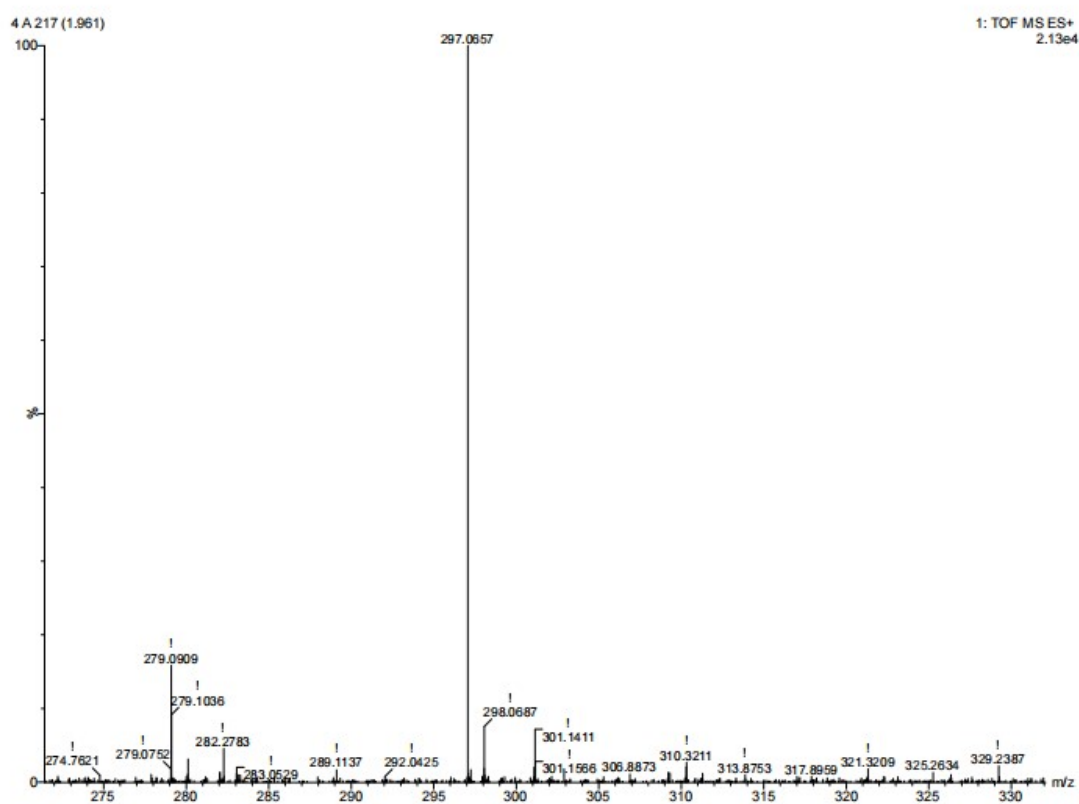

*N*-ethyl-2-(perfluorobenzo[*d*]oxazol-2-yl)aniline (**4b**)

$^1\text{H}$  NMR (400MHz,  $\text{CDCl}_3$ )

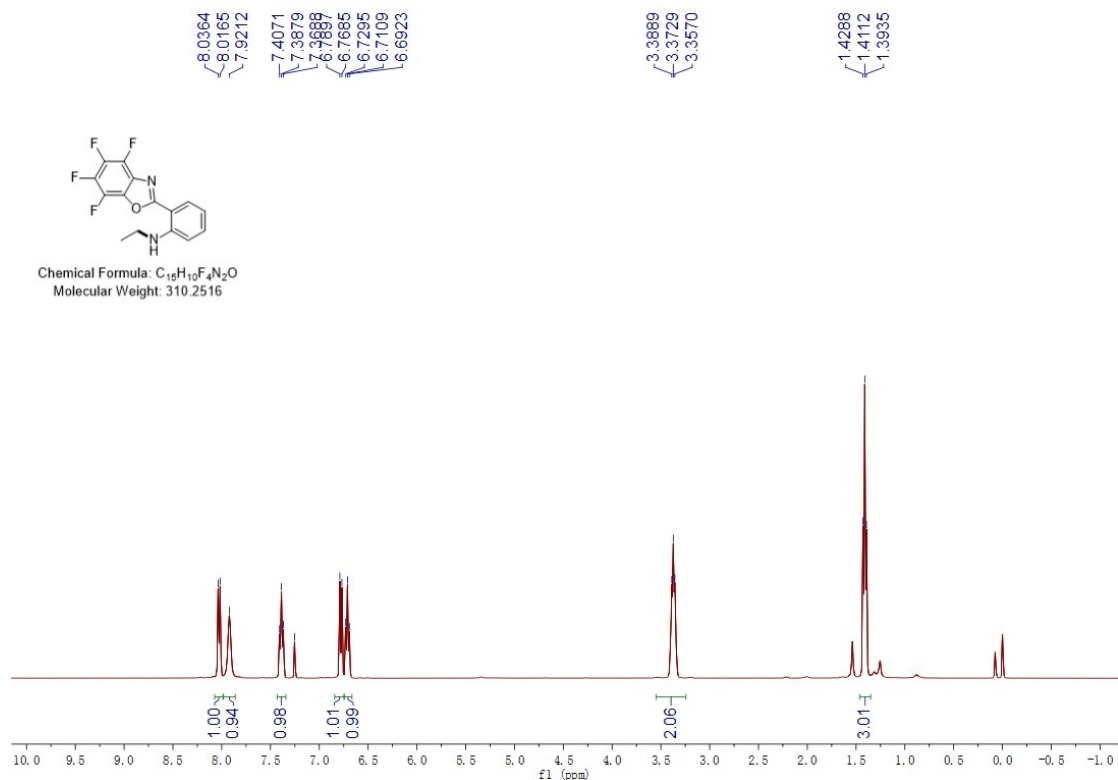

$^{13}\text{C}$  NMR (101 MHz,  $\text{CDCl}_3$ )

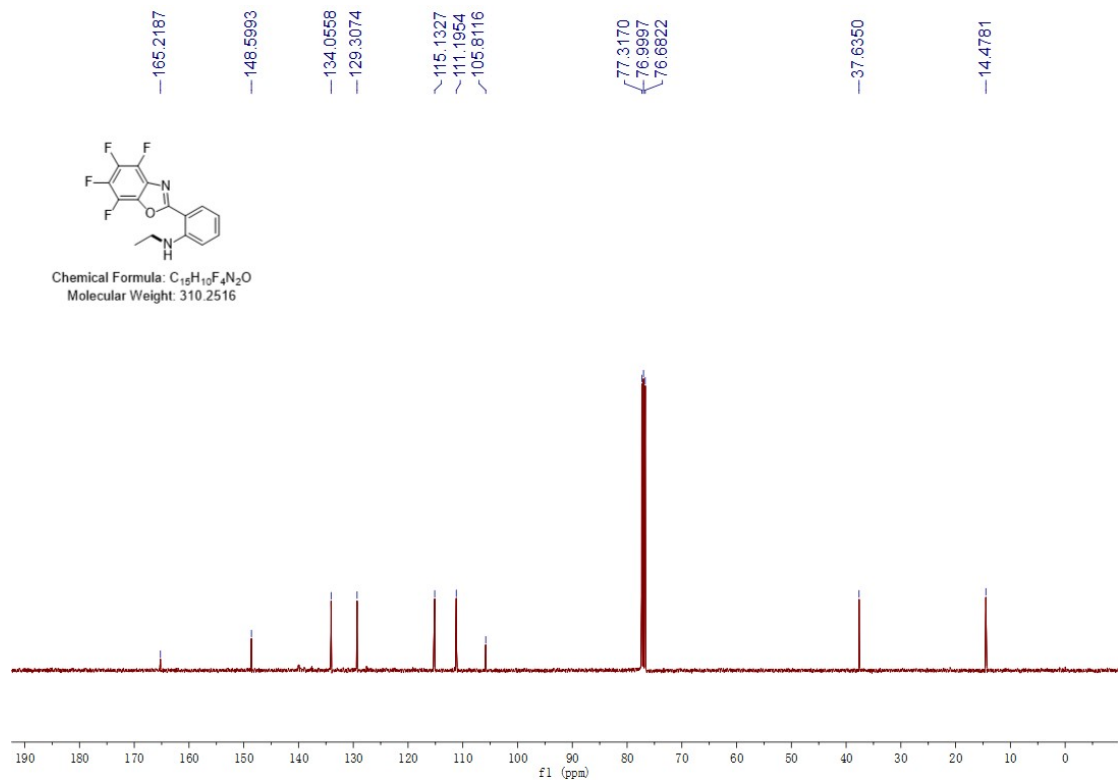

<sup>19</sup>F NMR (376 MHz, CDCl<sub>3</sub>)

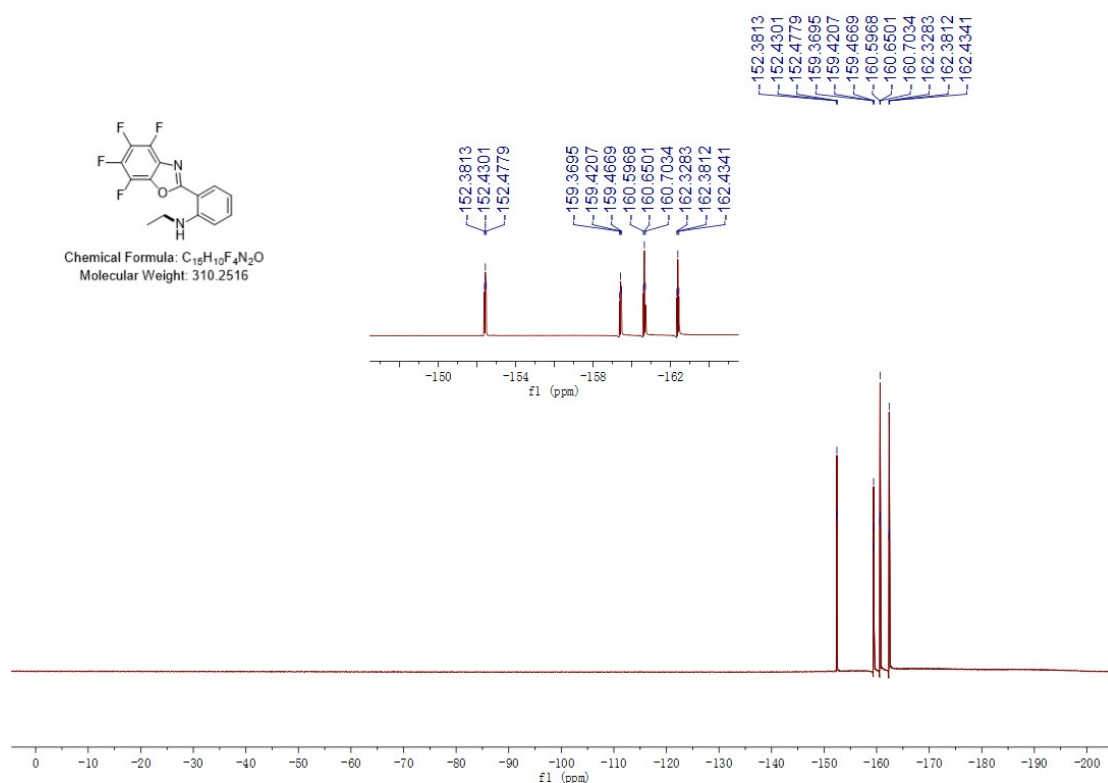

HRMS spectra

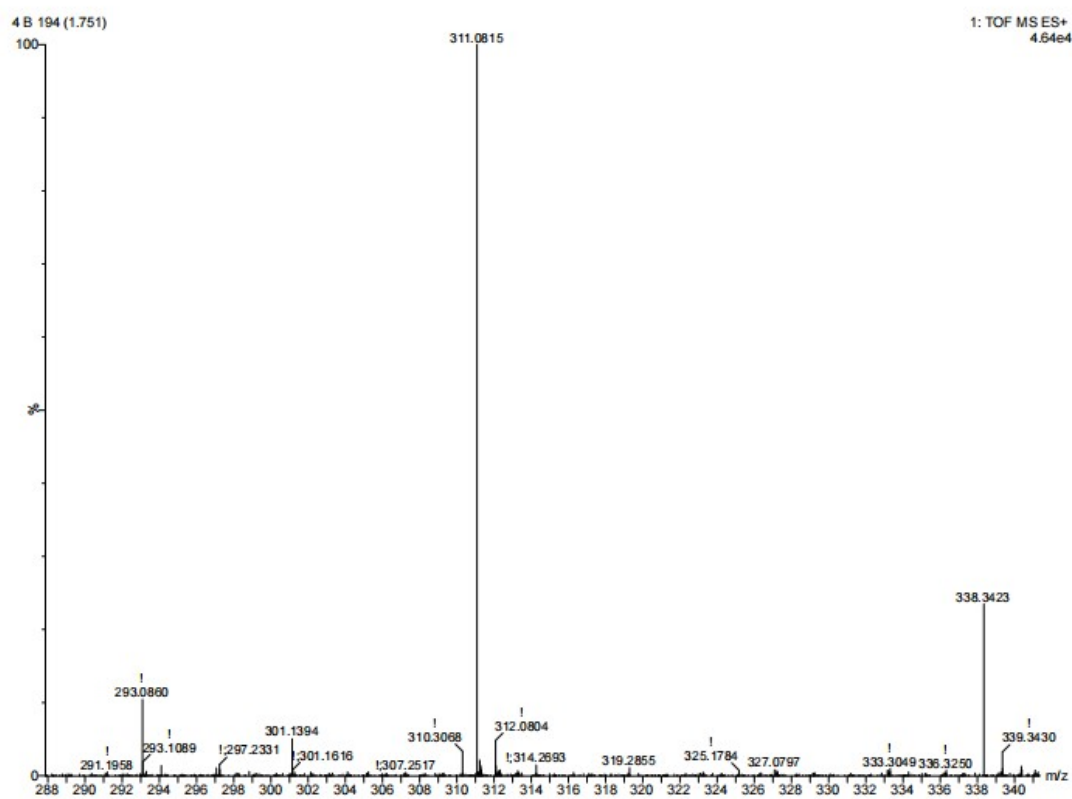

*N*-butyl-2-(perfluorobenzo[*d*]oxazol-2-yl)aniline (**4c**)

<sup>1</sup>H NMR (400 MHz, CDCl<sub>3</sub>)

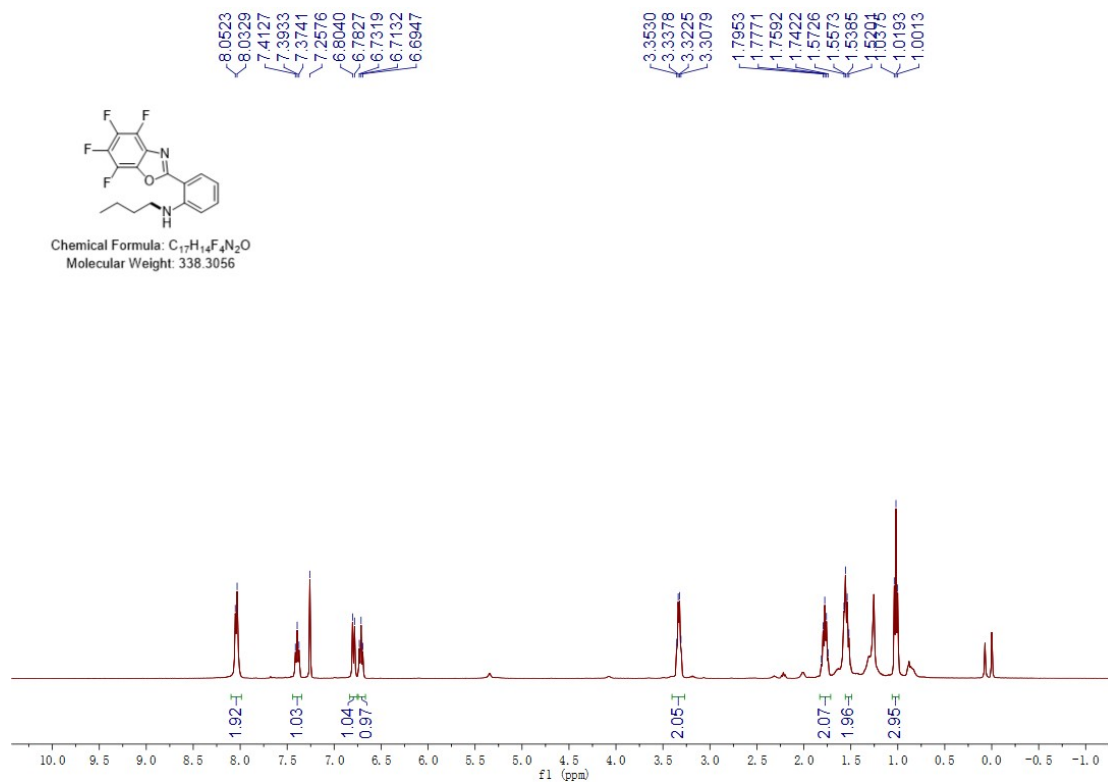

<sup>13</sup>C NMR (101 MHz, CDCl<sub>3</sub>)

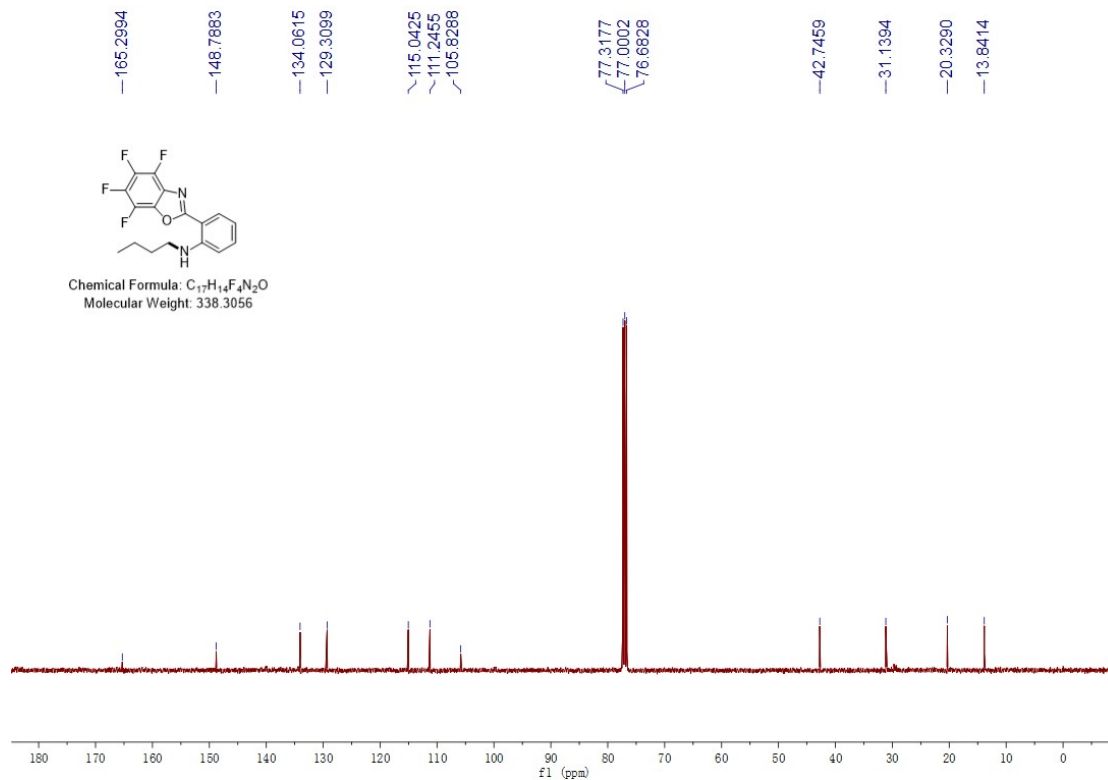

$^{19}\text{F}$  NMR (376 MHz,  $\text{CDCl}_3$ )

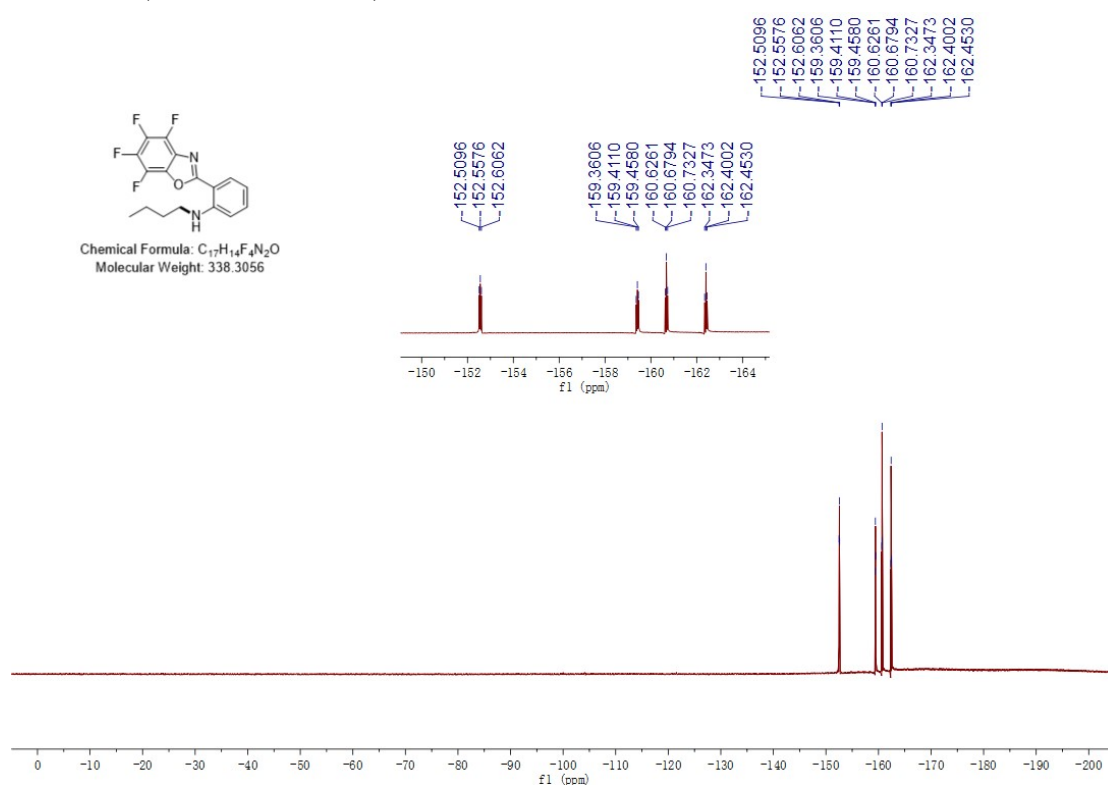

HRMS spectra

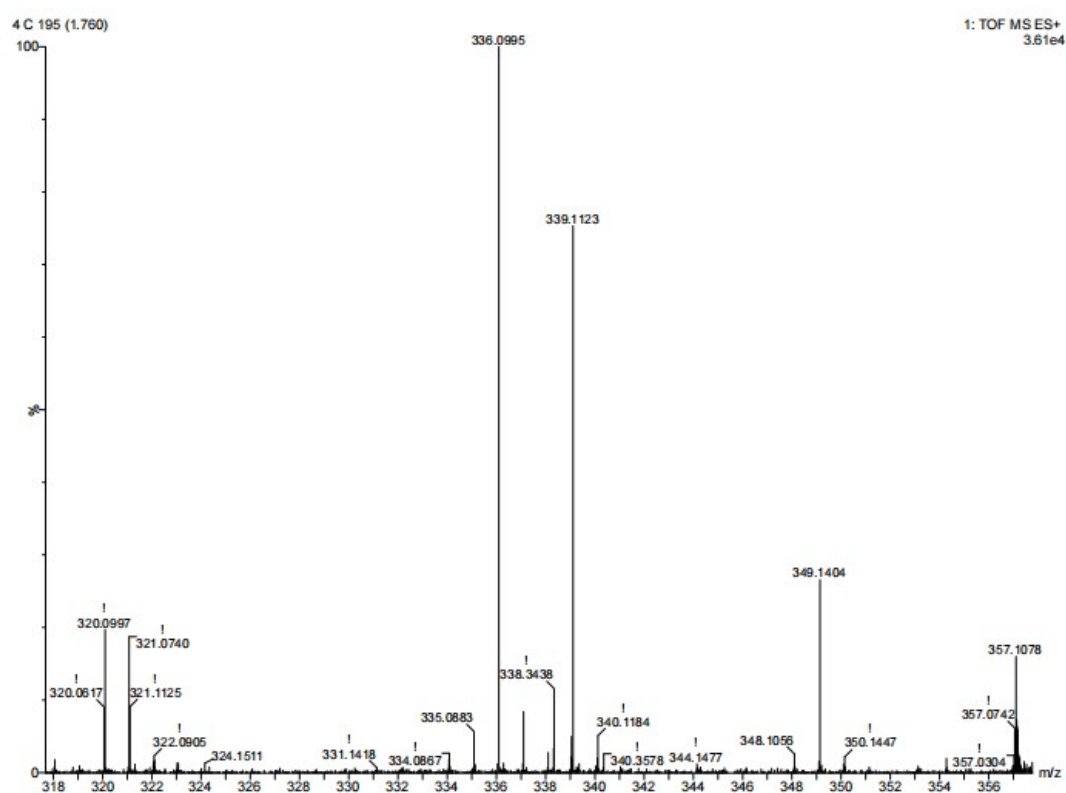

*N*-pentyl-2-(perfluorobenzo[*d*]oxazol-2-yl)aniline (**4d**)

$^1\text{H}$  NMR (400 MHz,  $\text{CDCl}_3$ )

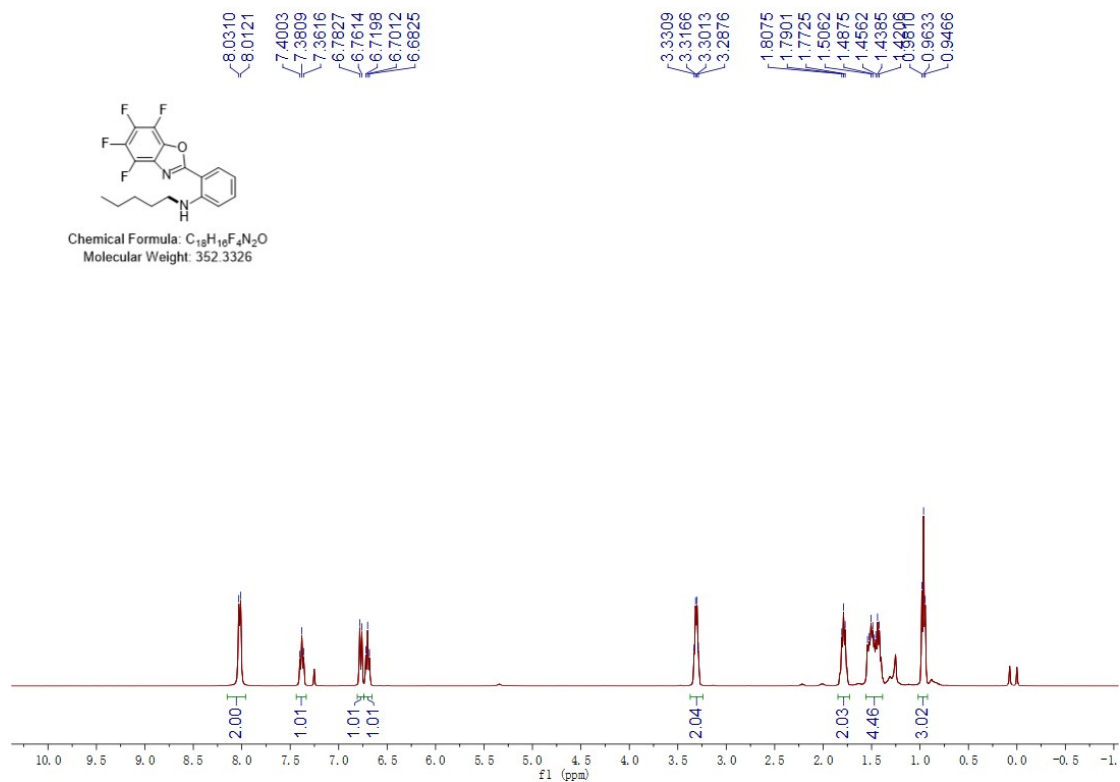

$^{13}\text{C}$  NMR (101 MHz,  $\text{CDCl}_3$ )

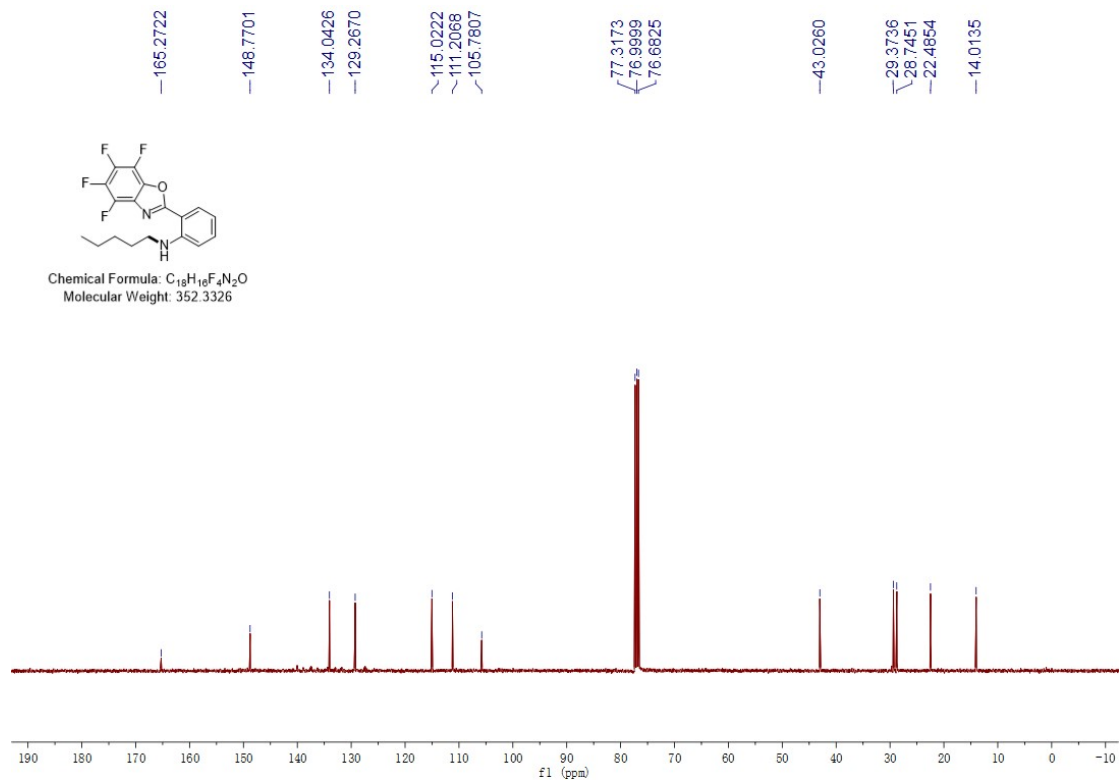

$^{19}\text{F}$  NMR (376 MHz,  $\text{CDCl}_3$ )

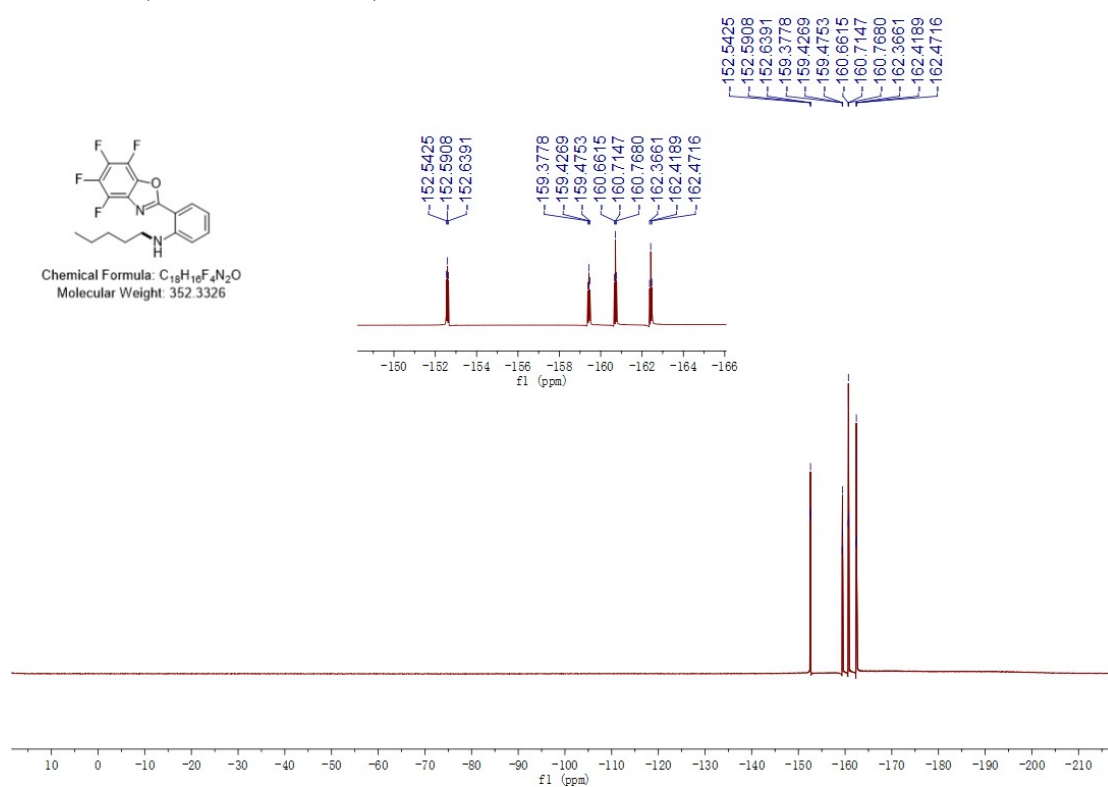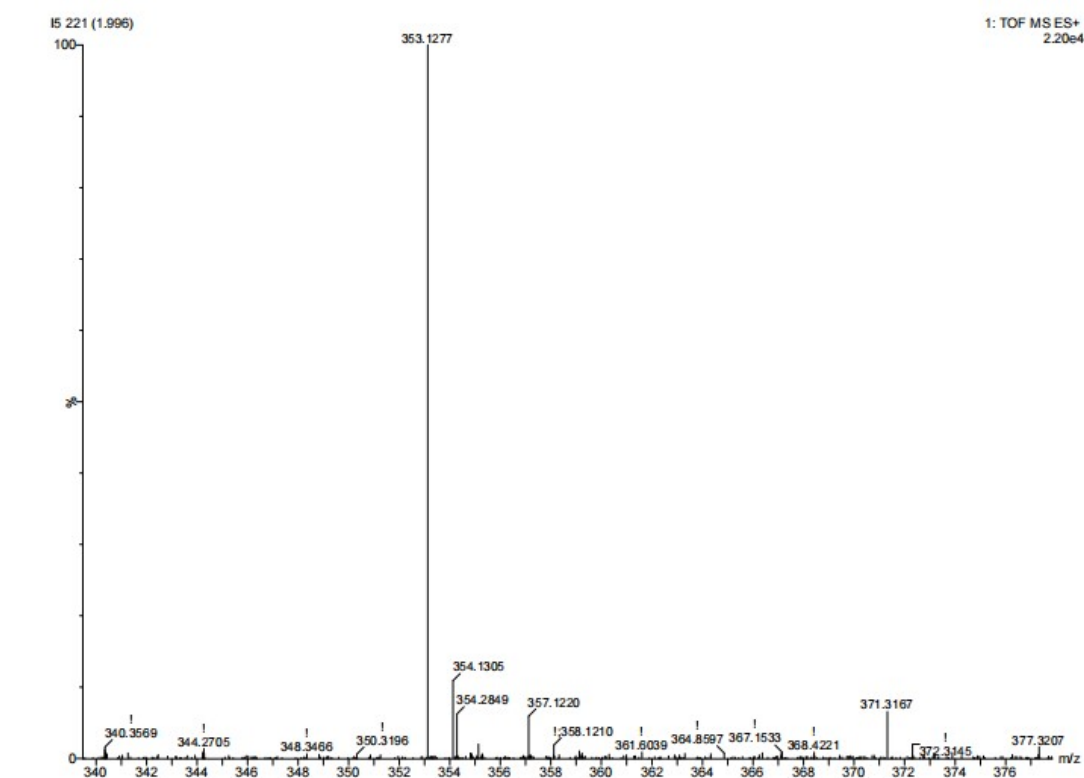

*N*-hexyl-2-(perfluorobenzo[d]oxazol-2-yl)aniline (**4e**)

$^1\text{H}$  NMR (400 MHz,  $\text{CDCl}_3$ )

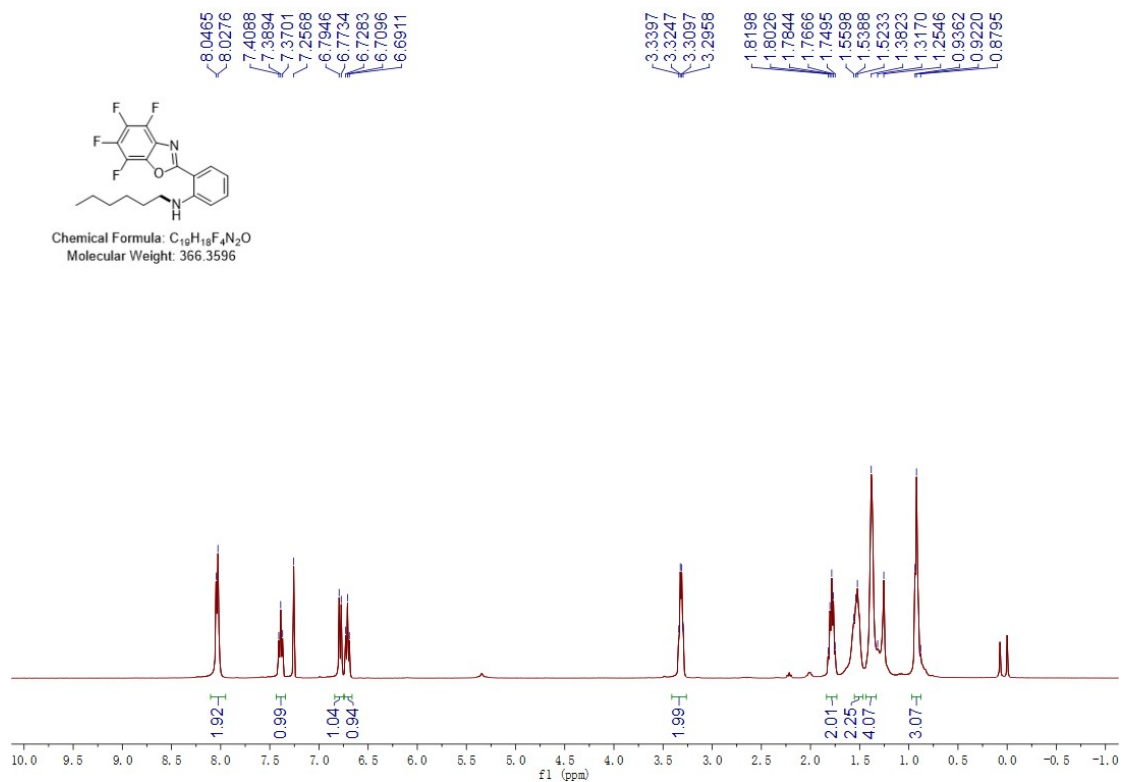

$^{13}\text{C}$  NMR (101 MHz,  $\text{CDCl}_3$ )

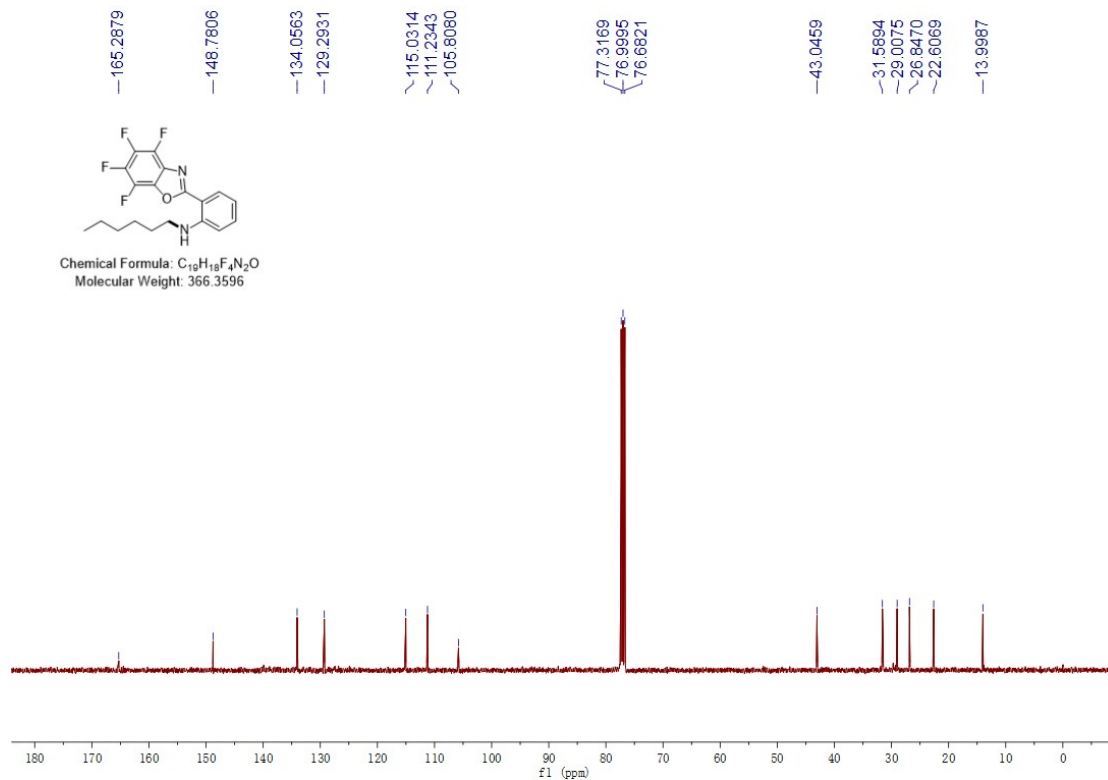

$^{19}\text{F}$  NMR (376 MHz,  $\text{CDCl}_3$ )

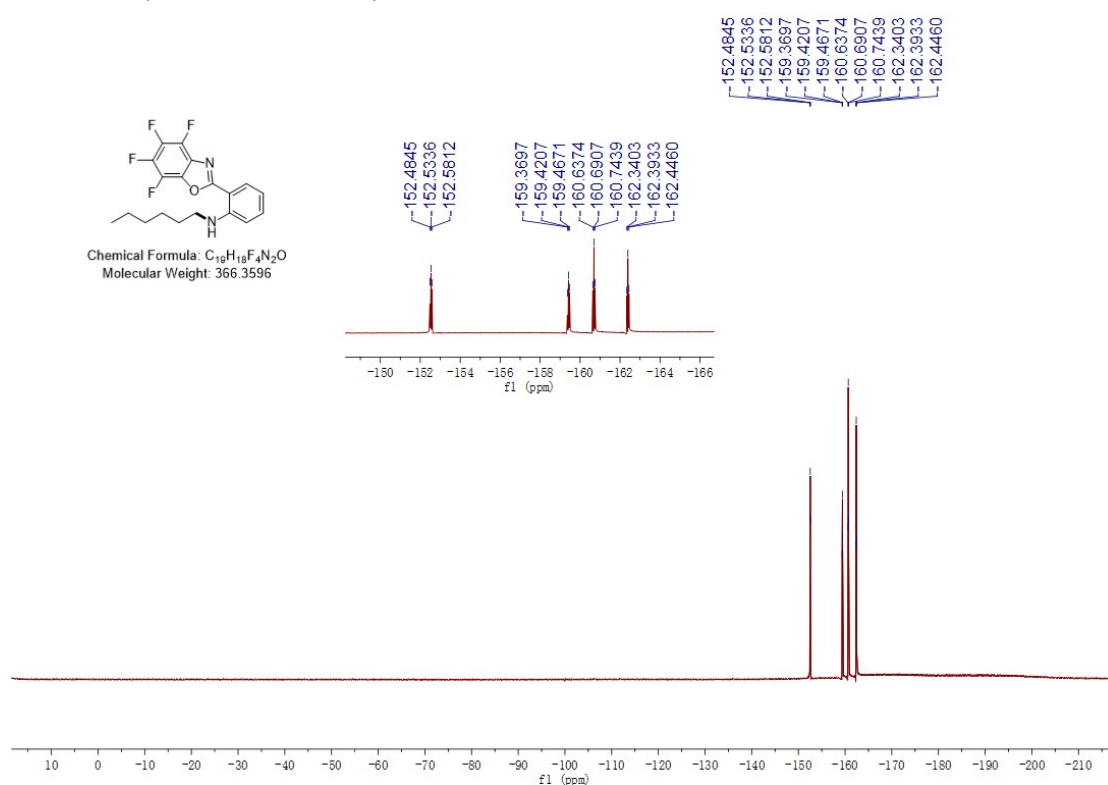

HRMS spectra

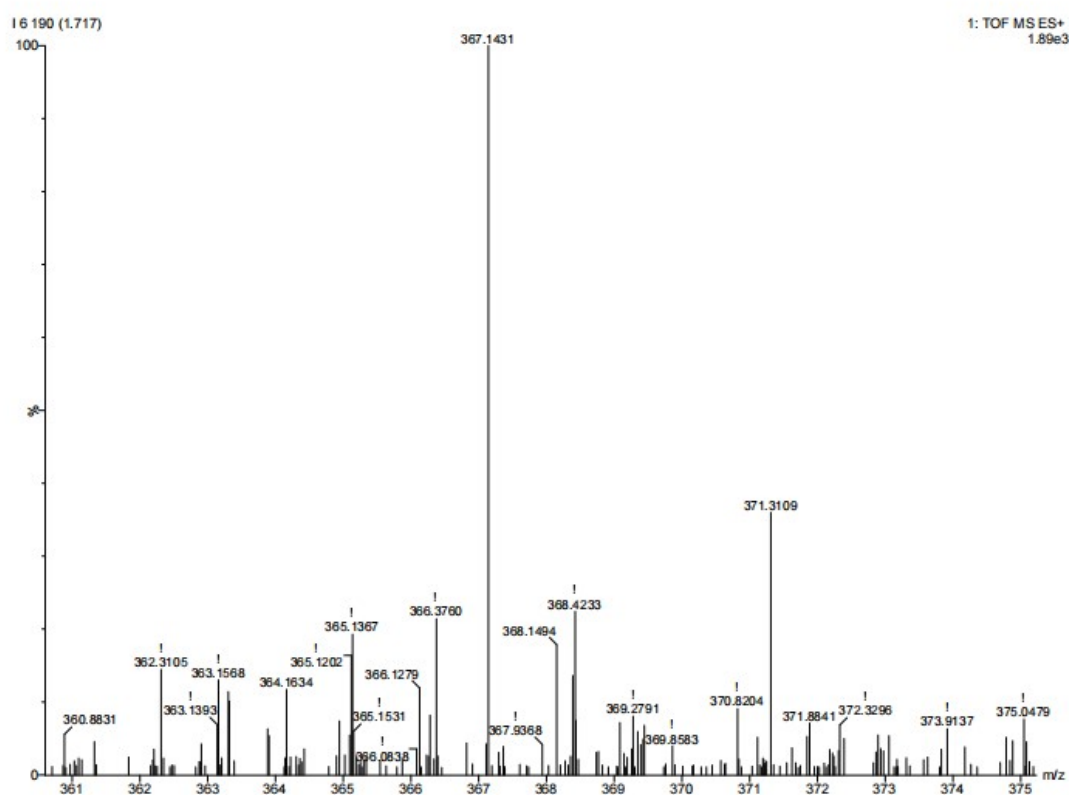

*N*-heptyl-2-(perfluorobenzo[d]oxazol-2-yl)aniline (**4f**)

<sup>1</sup>H NMR (400 MHz, CDCl<sub>3</sub>)

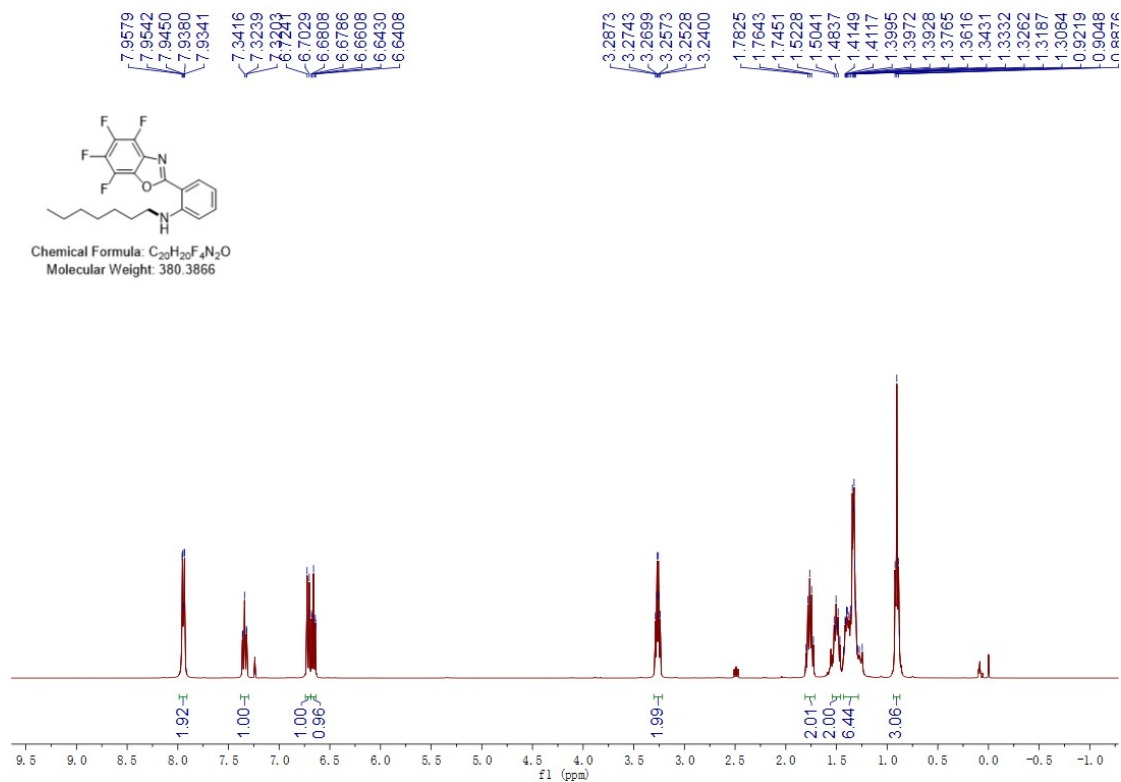

<sup>13</sup>C NMR (101 MHz, CDCl<sub>3</sub>)

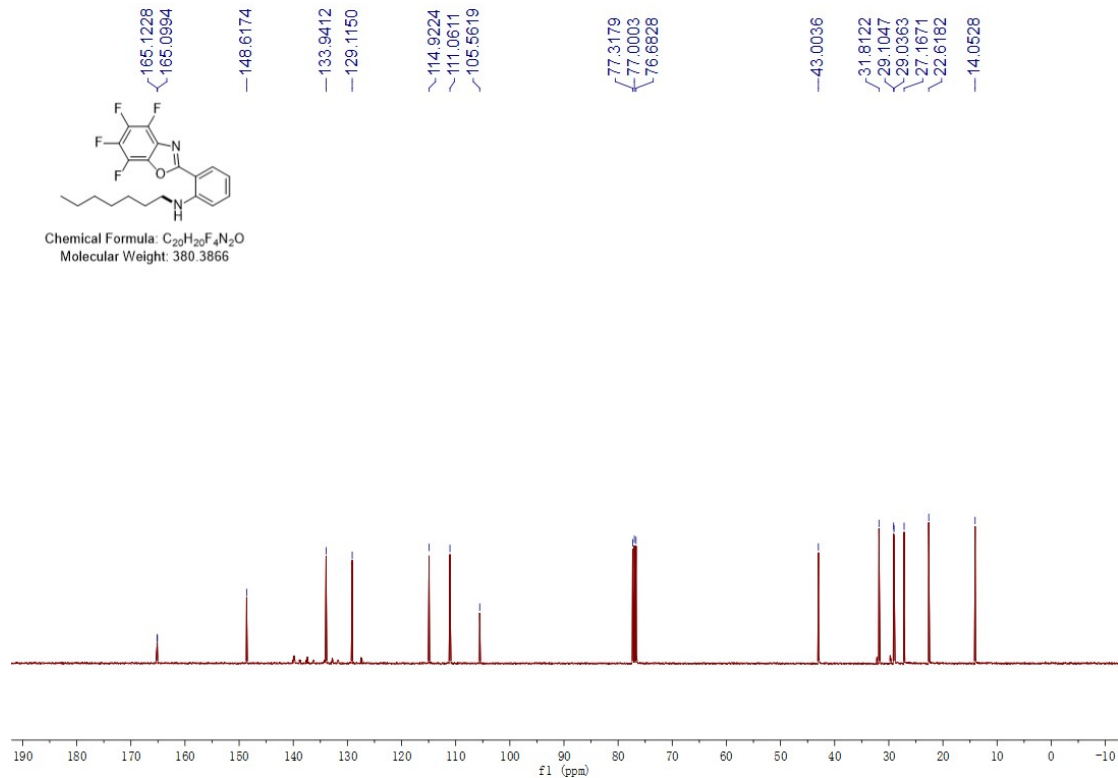

<sup>19</sup>F NMR (376 MHz, CDCl<sub>3</sub>)

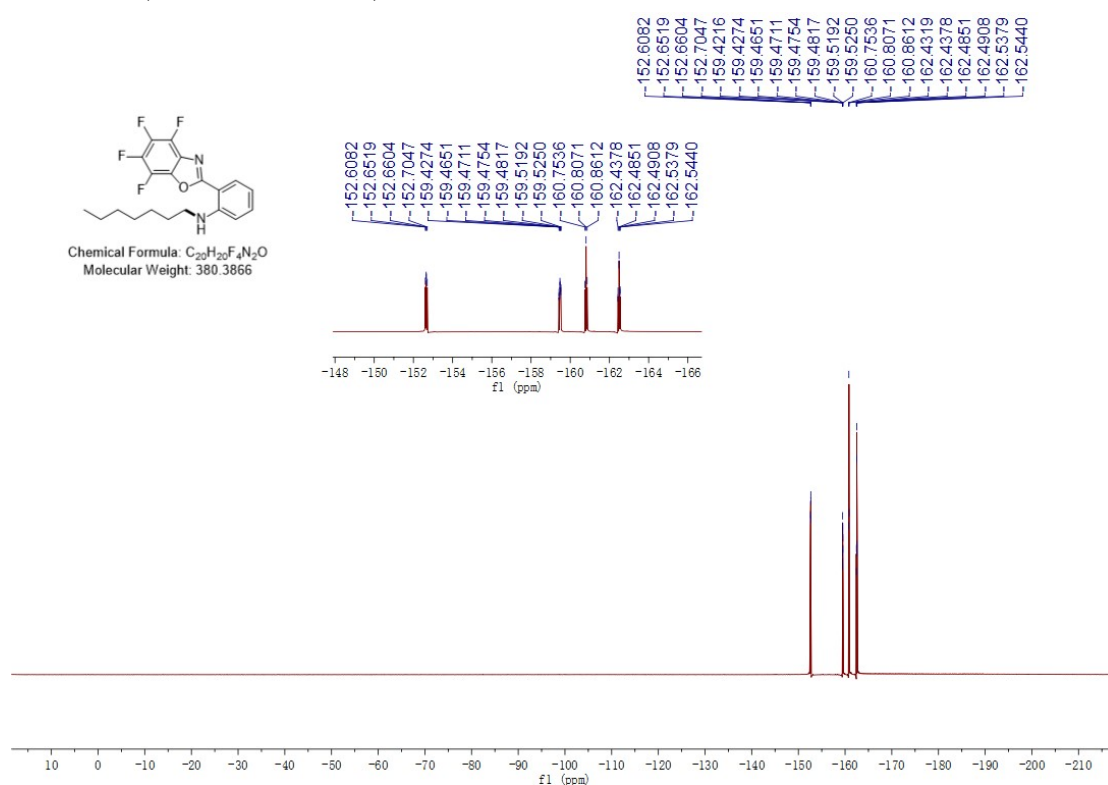

HRMS spectra

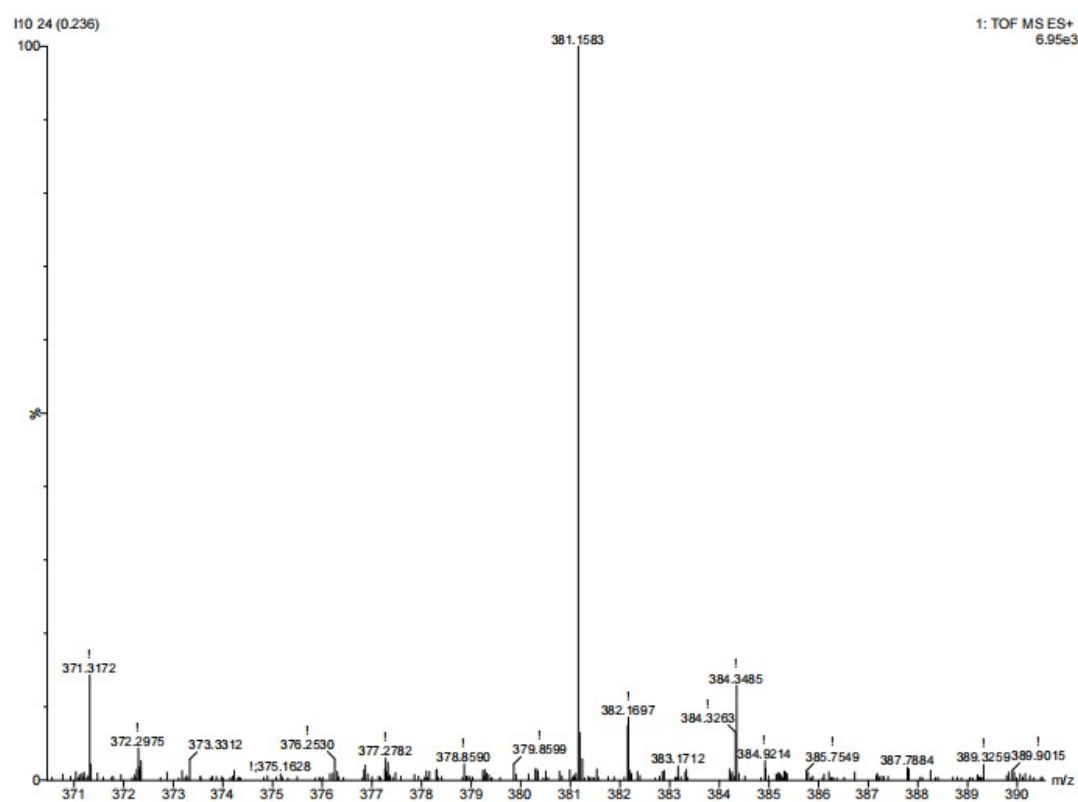

*N*-octyl-2-(perfluorobenzo[d]oxazol-2-yl)aniline (**4g**)

$^1\text{H}$  NMR (400 MHz,  $\text{CDCl}_3$ )

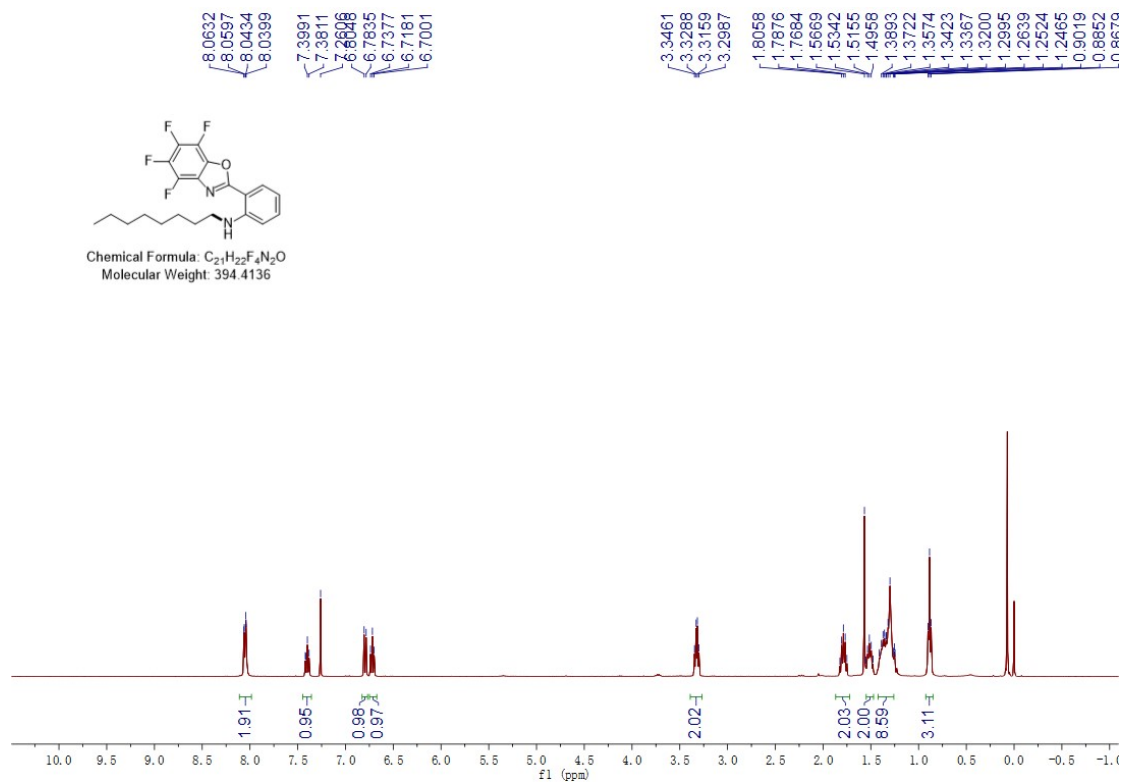

$^{13}\text{C}$  NMR (101MHz,  $\text{CDCl}_3$ )

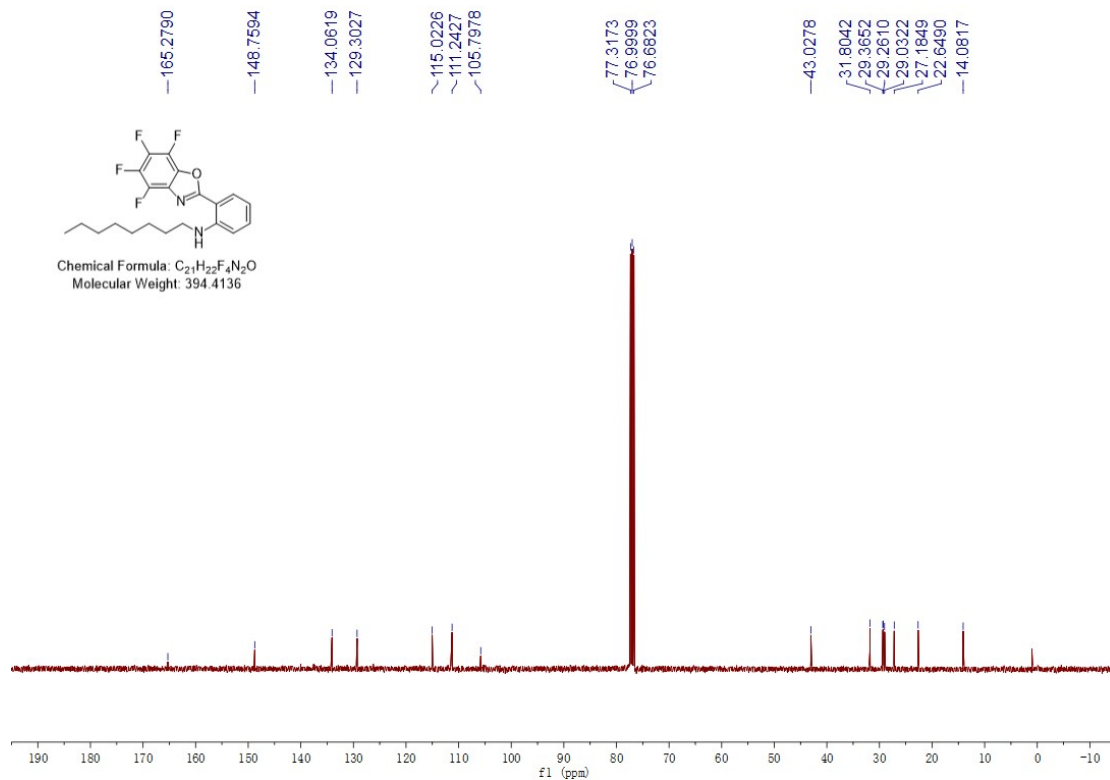

$^{19}\text{F}$  NMR (376 MHz,  $\text{CDCl}_3$ )

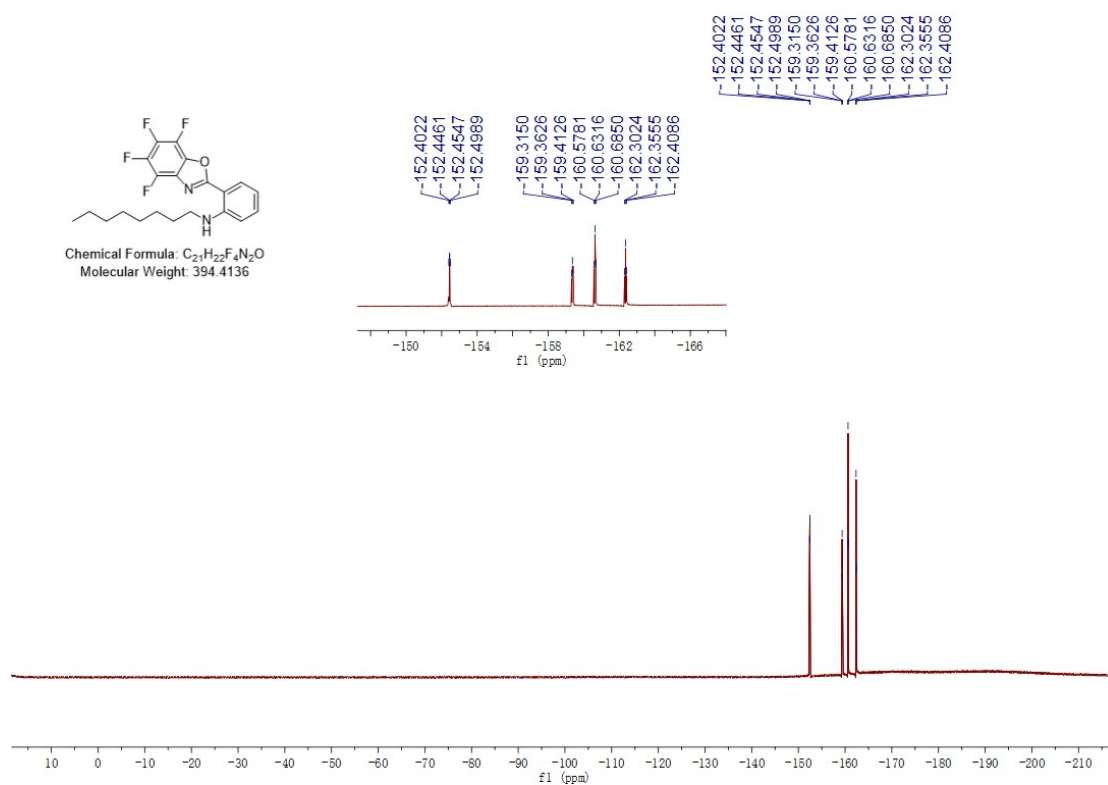

HRMS spectra

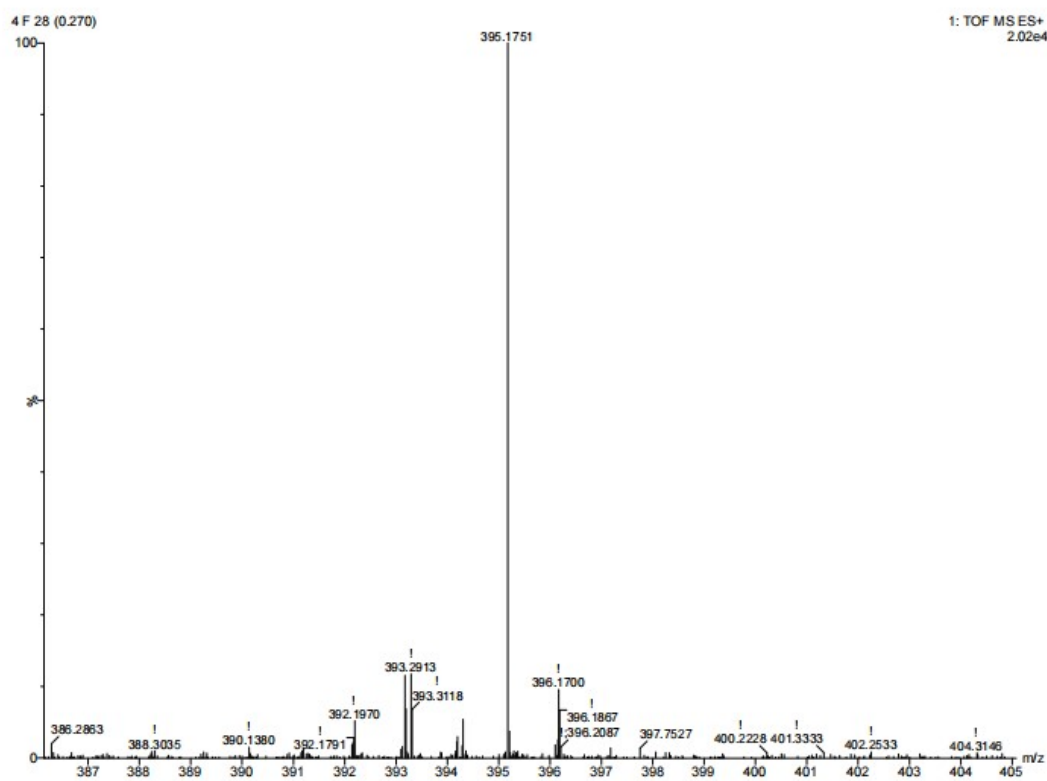

*N*-nonyl-2-(perfluorobenzo[d]oxazol-2-yl)aniline (**4h**)

$^1\text{H}$  NMR (400 MHz,  $\text{CDCl}_3$ )

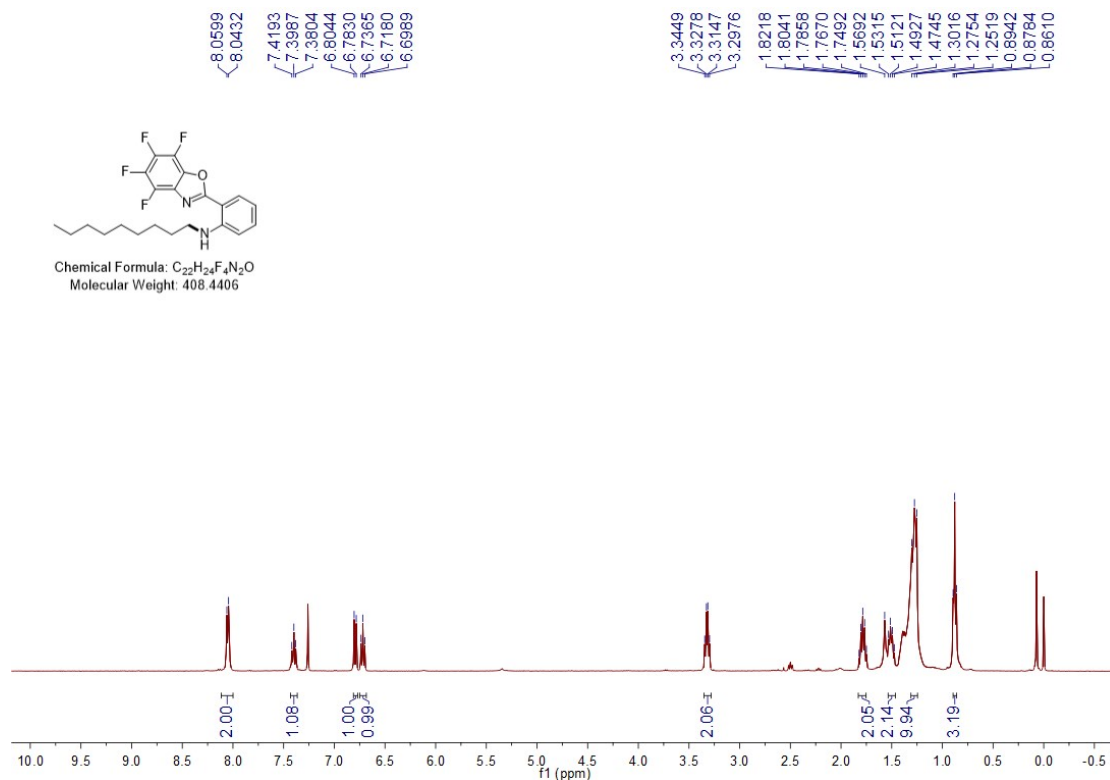

$^{13}\text{C}$  NMR (101MHz,  $\text{CDCl}_3$ )

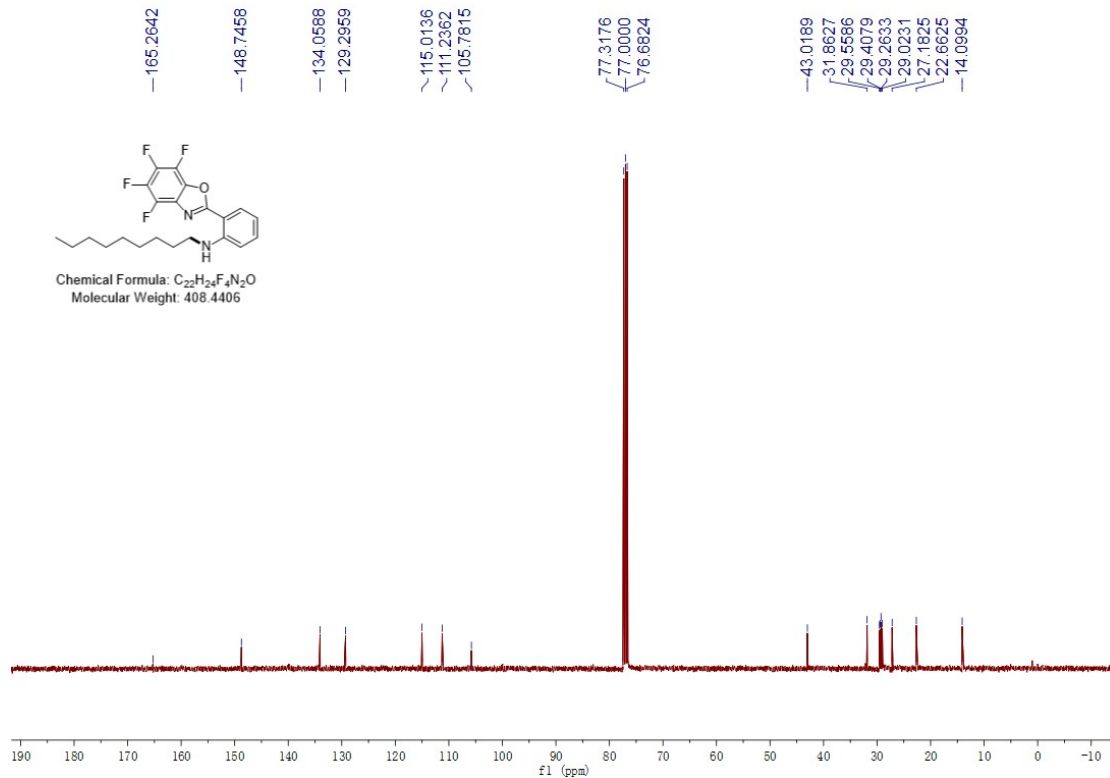

$^{19}\text{F}$  NMR (376 MHz,  $\text{CDCl}_3$ )

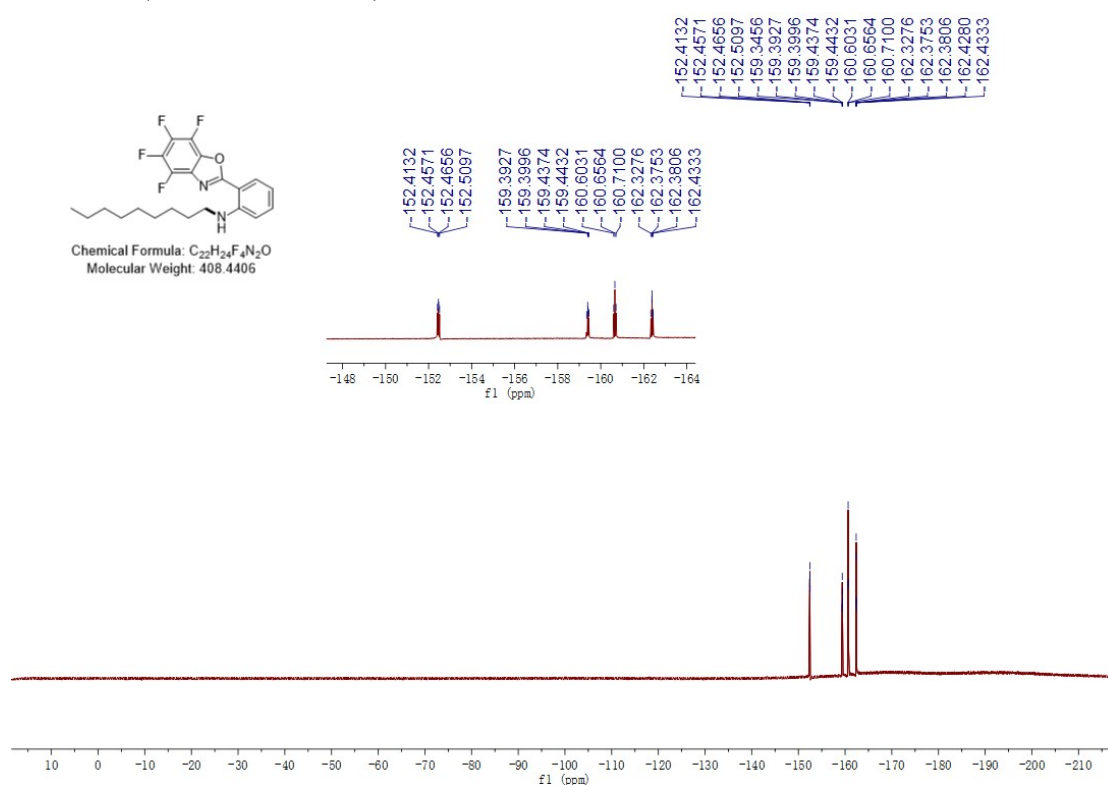

HRMS spectra

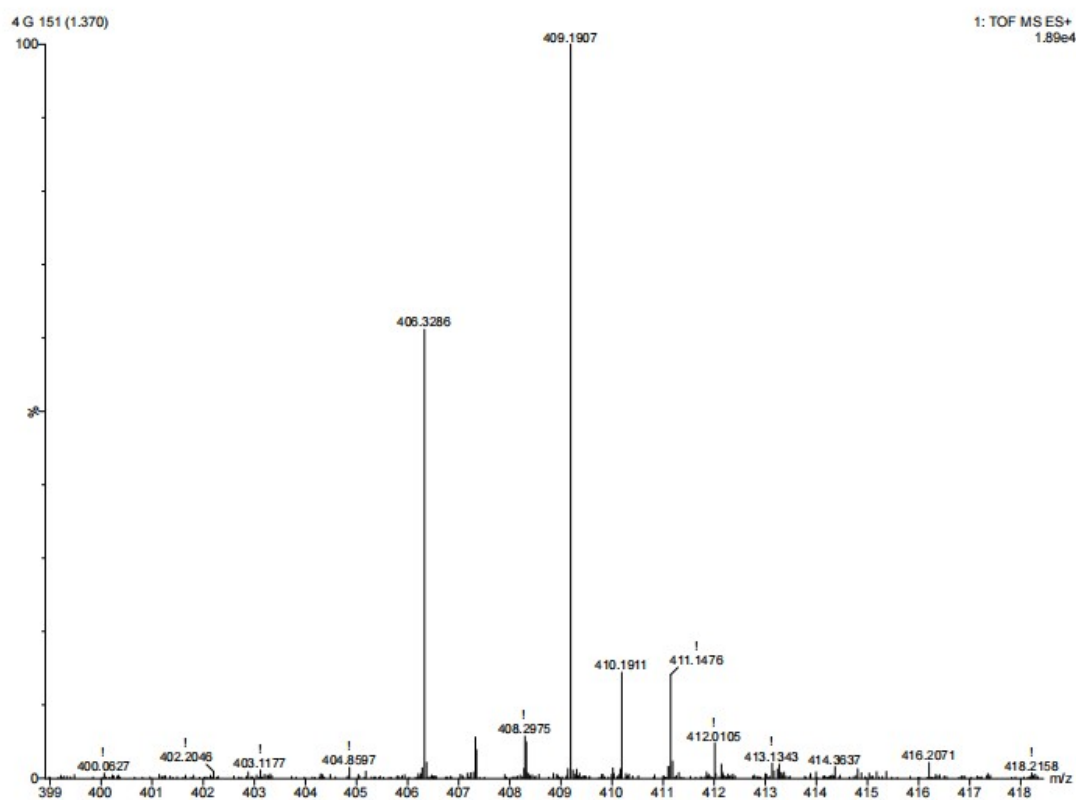

*N*-decyl-2-(perfluorobenzo[*d*]oxazol-2-yl)aniline (**4i**)

$^1\text{H}$  NMR (400 MHz,  $\text{CDCl}_3$ )

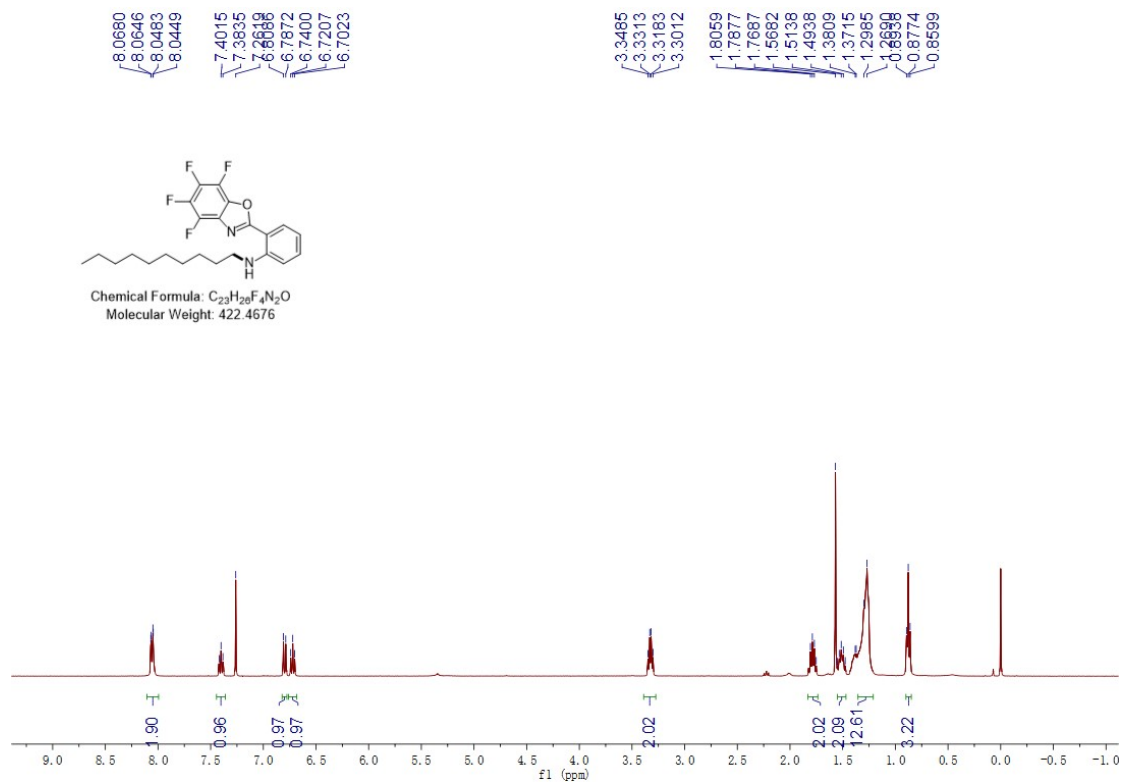

$^{13}\text{C}$  NMR (101 MHz,  $\text{CDCl}_3$ )

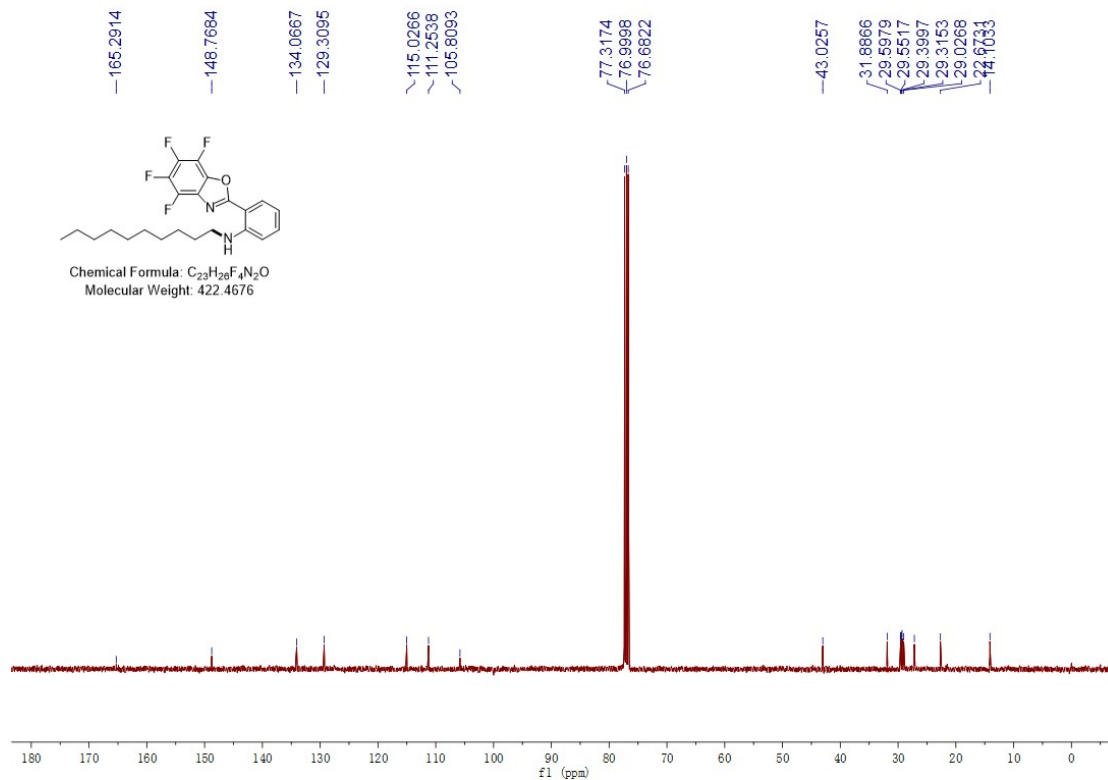

$^{19}\text{F}$  NMR (376 MHz,  $\text{CDCl}_3$ )

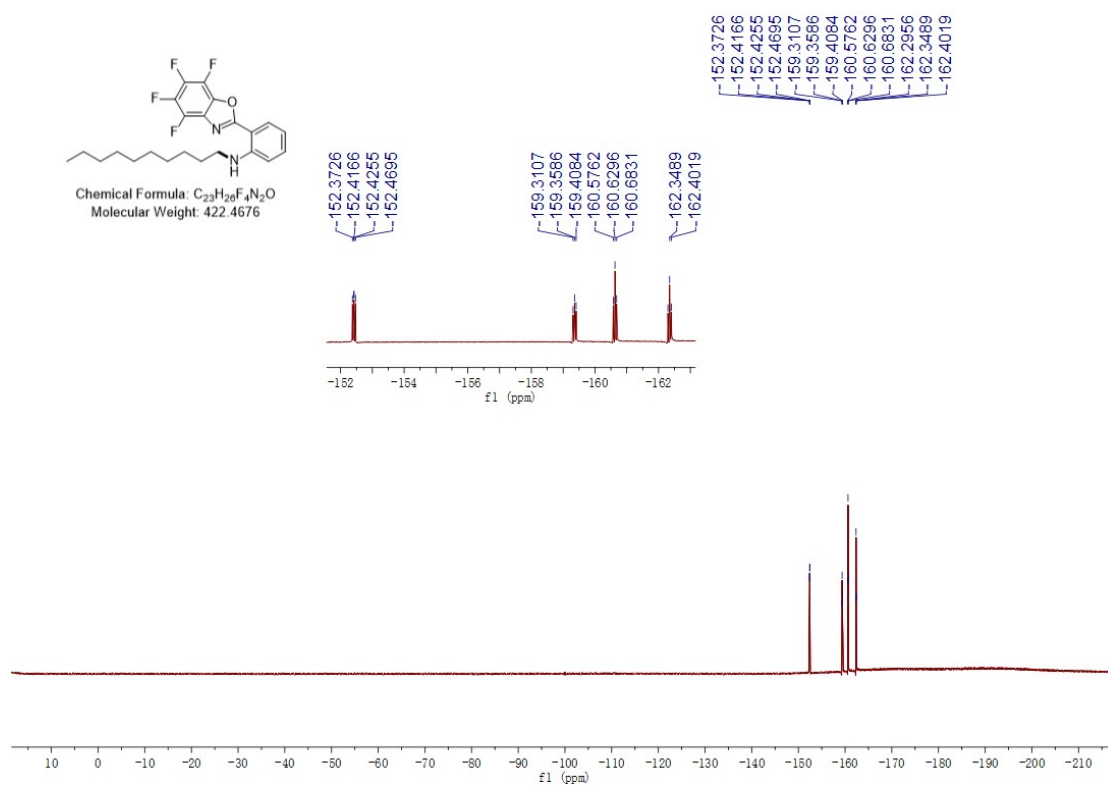

HRMS spectra

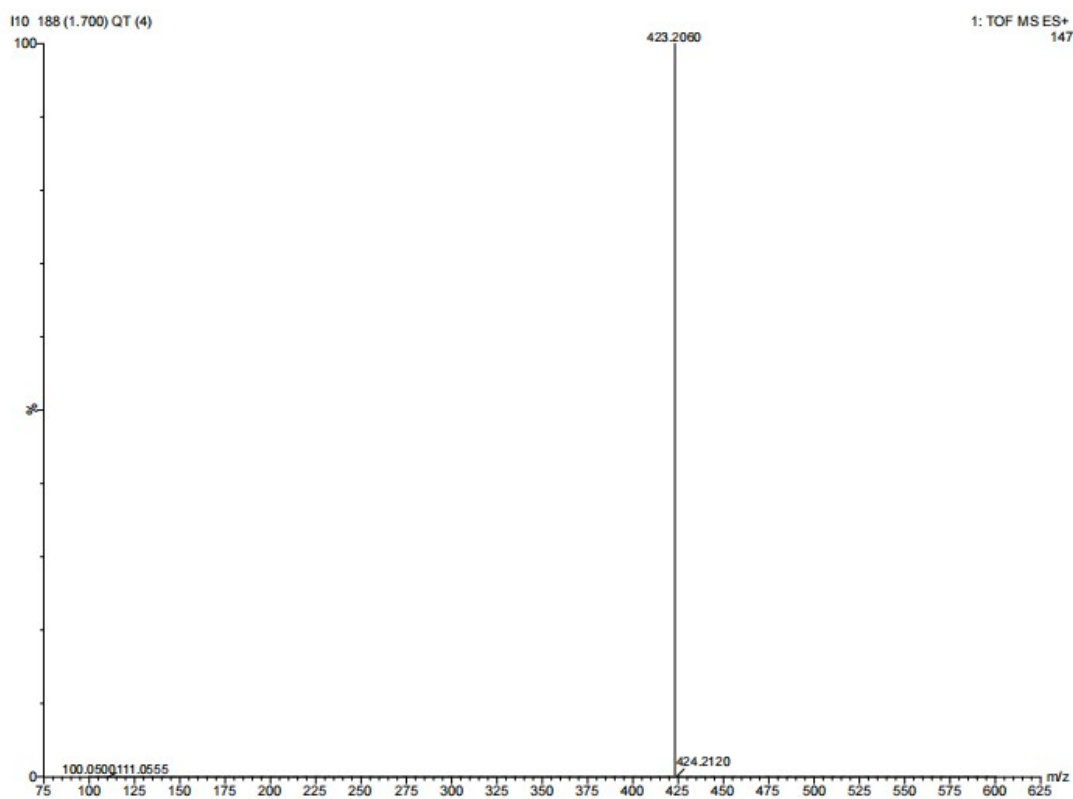

*N*-dodecyl-2-(perfluorobenzo[d]oxazol-2-yl)aniline (**4j**)

$^1\text{H}$  NMR (400 MHz,  $\text{CDCl}_3$ )

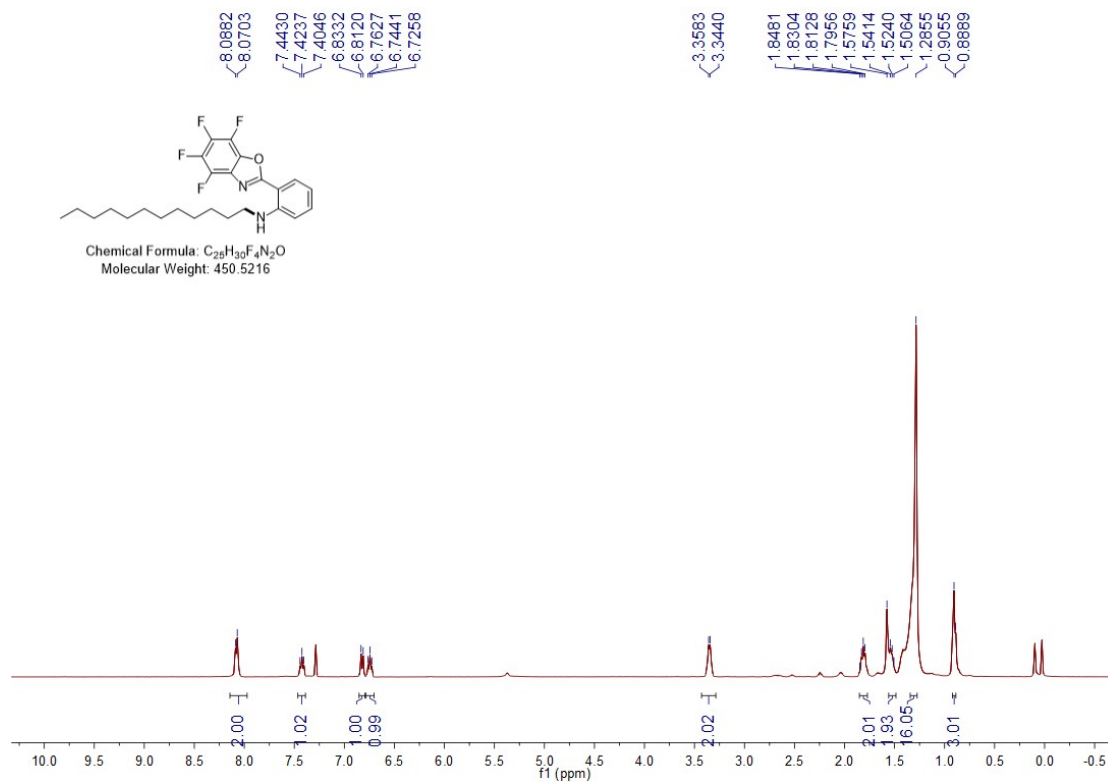

$^{13}\text{C}$  NMR (101 MHz,  $\text{CDCl}_3$ )

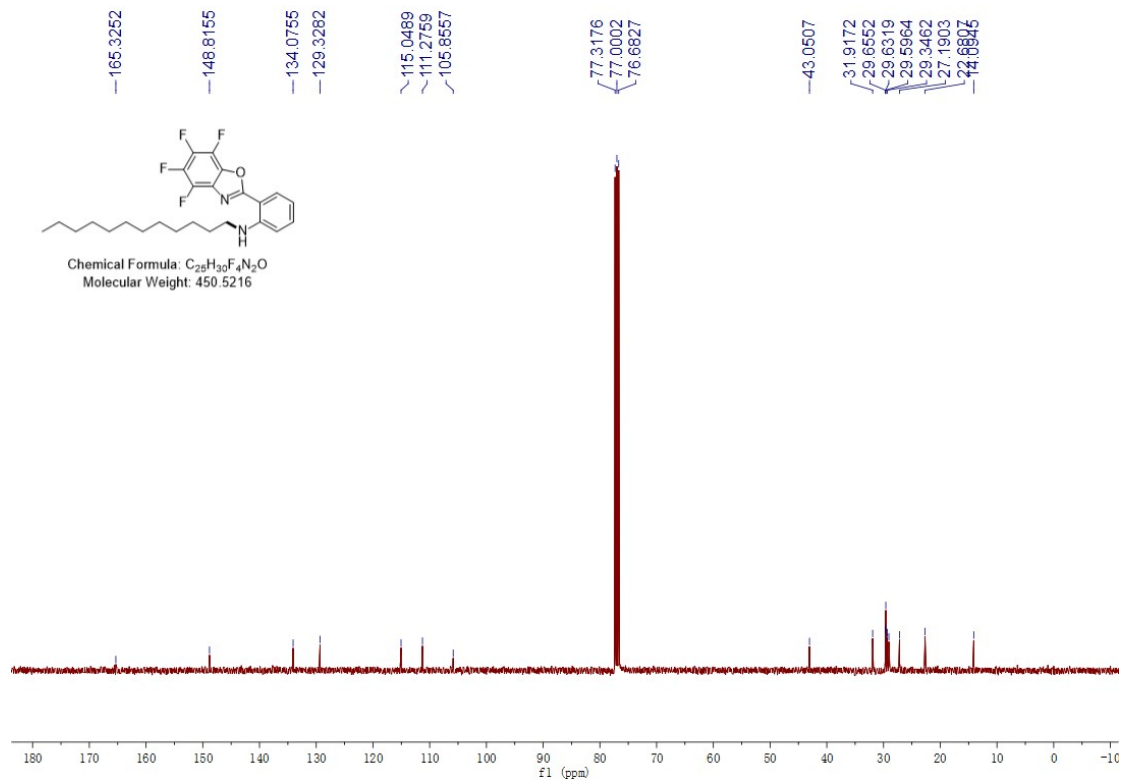

$^{19}\text{F}$  NMR (376 MHz,  $\text{CDCl}_3$ )

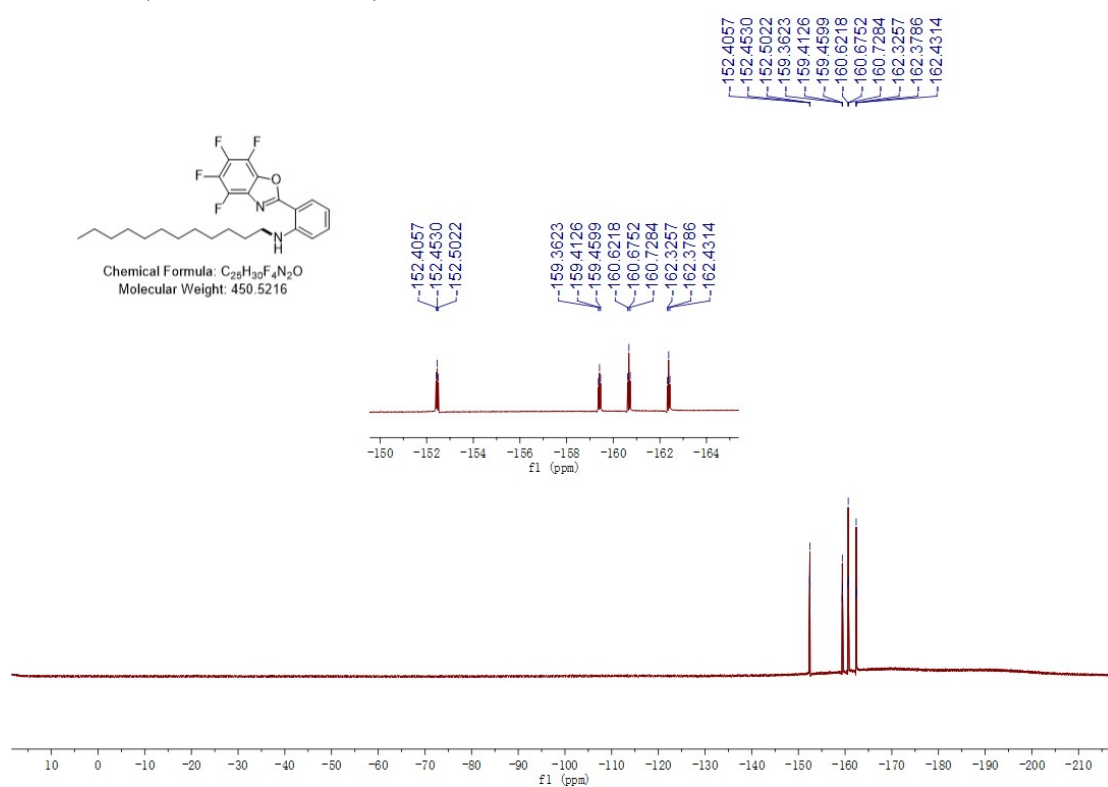

HRMS spectra

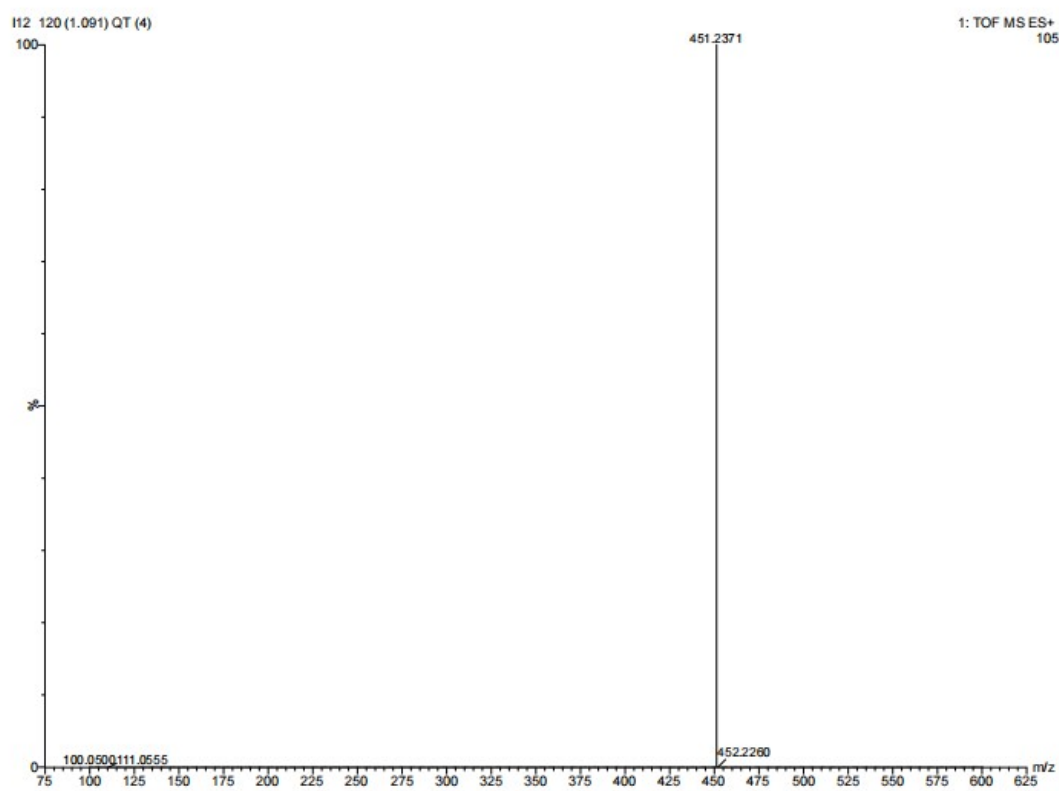

*N*-hexadecyl-2-(perfluorobenzo[*d*]oxazol-2-yl)aniline (**4k**)

$^1\text{H}$  NMR (400 MHz,  $\text{CDCl}_3$ )

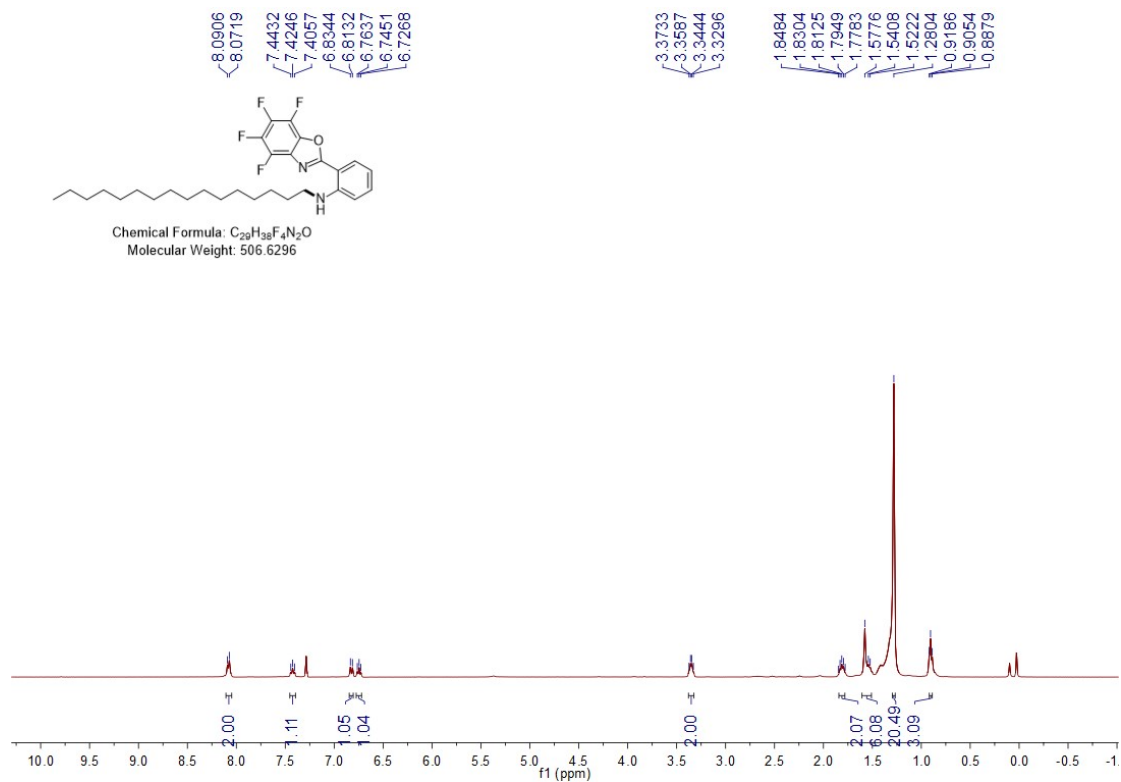

$^{13}\text{C}$  NMR (101 MHz,  $\text{CDCl}_3$ )

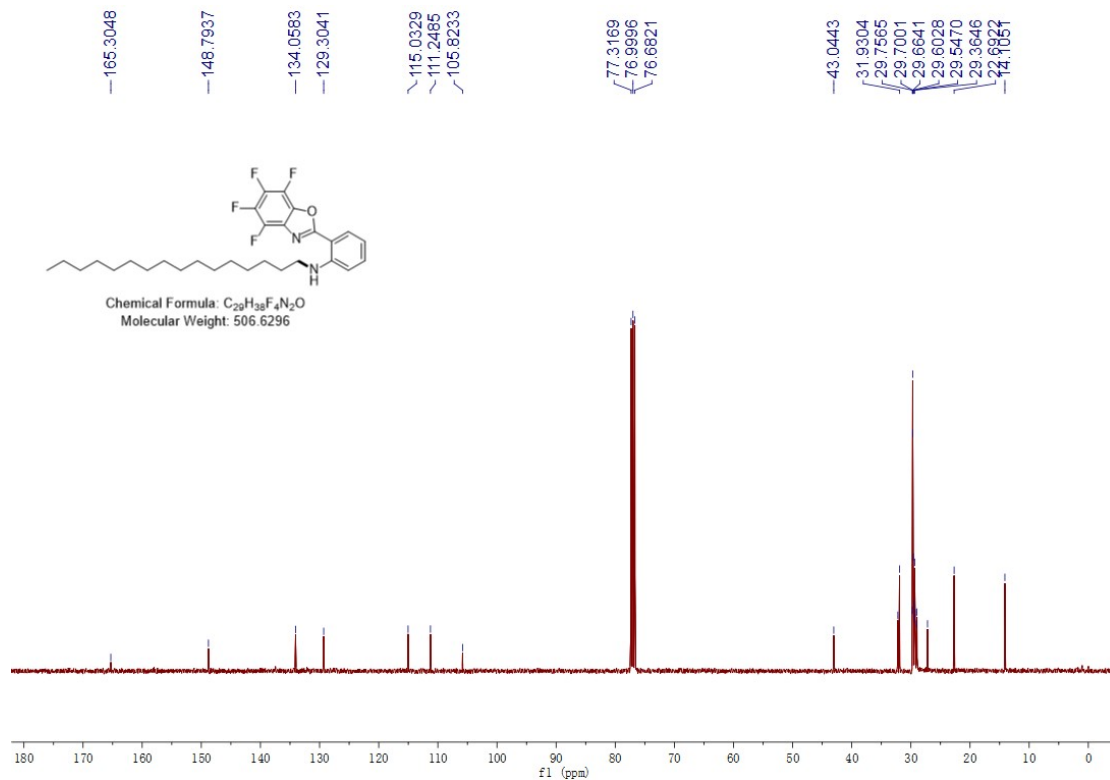

$^{19}\text{F}$  NNMR (376 MHz,  $\text{CDCl}_3$ )

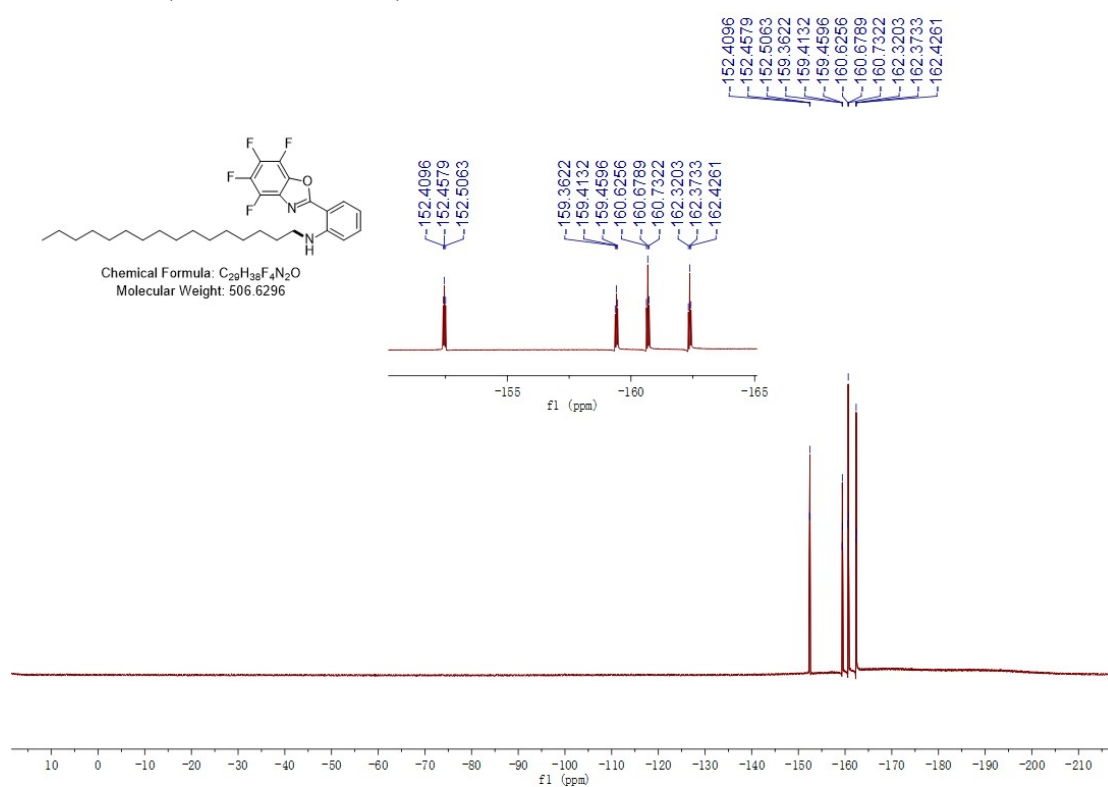

HRMS spectra

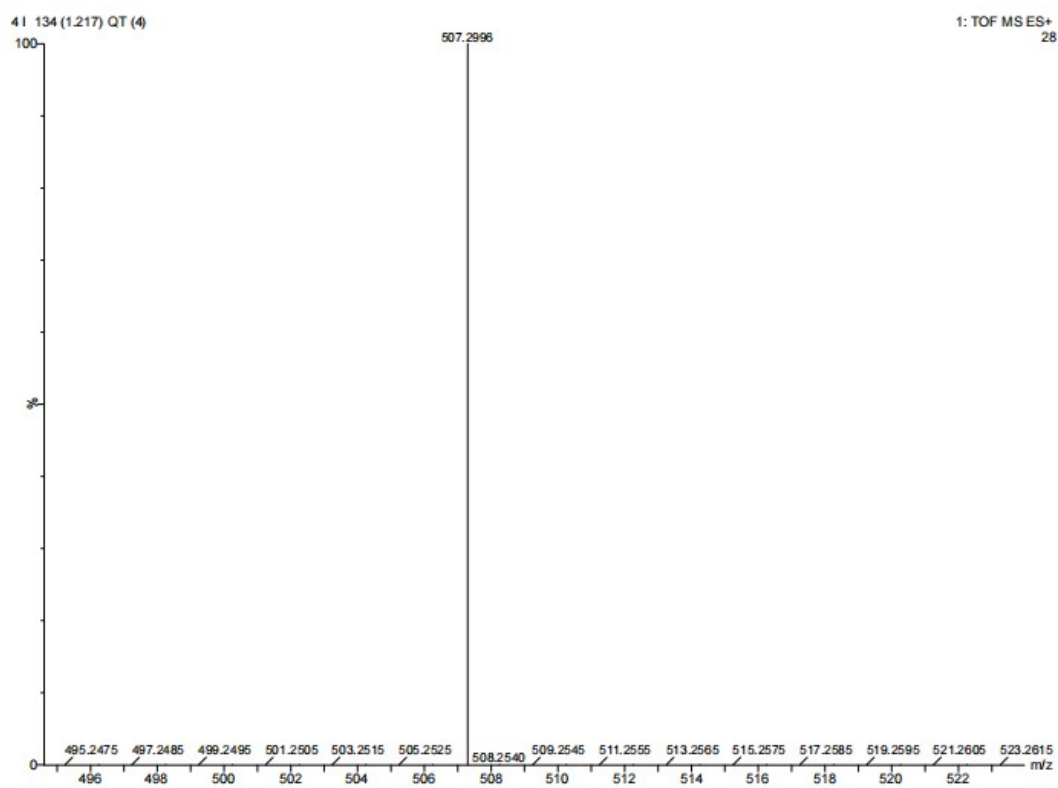

*N*-octadecyl-2-(perfluorobenzo[d]oxazol-2-yl)aniline (**4l**)

$^1\text{H}$  NMR (400 MHz,  $\text{CDCl}_3$ )

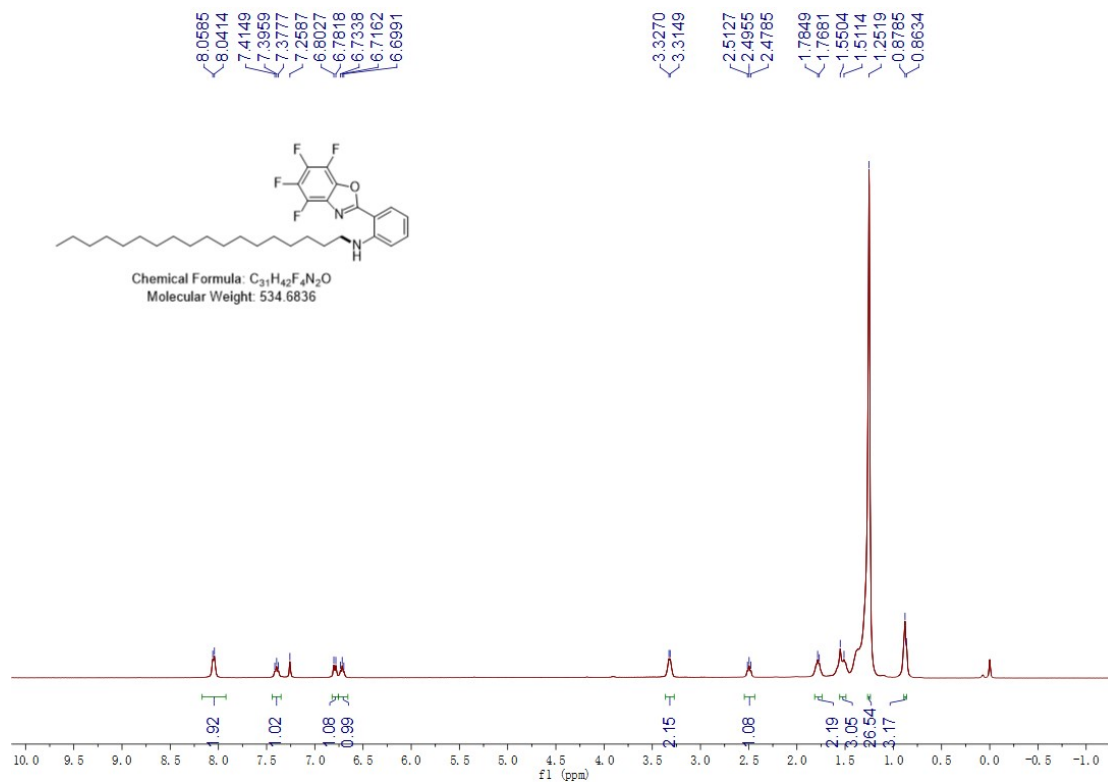

$^{13}\text{C}$  NMR (101 MHz,  $\text{CDCl}_3$ )

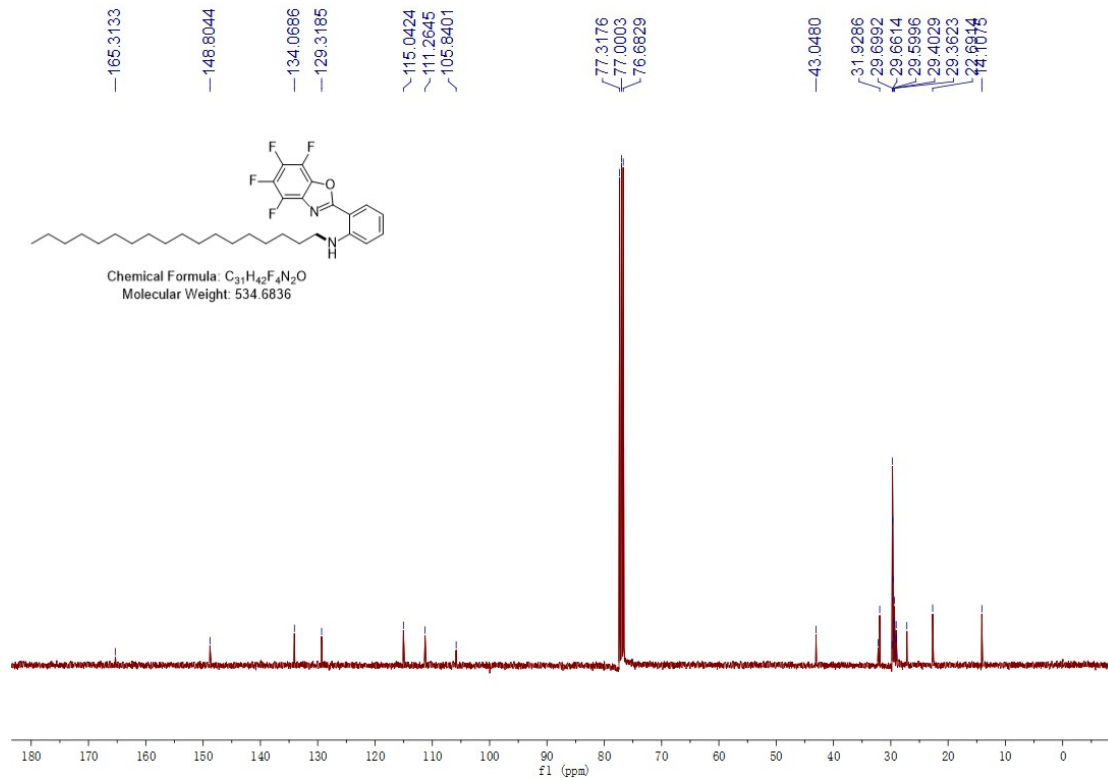

$^{19}\text{F}$  NMR (376 MHz,  $\text{CDCl}_3$ )

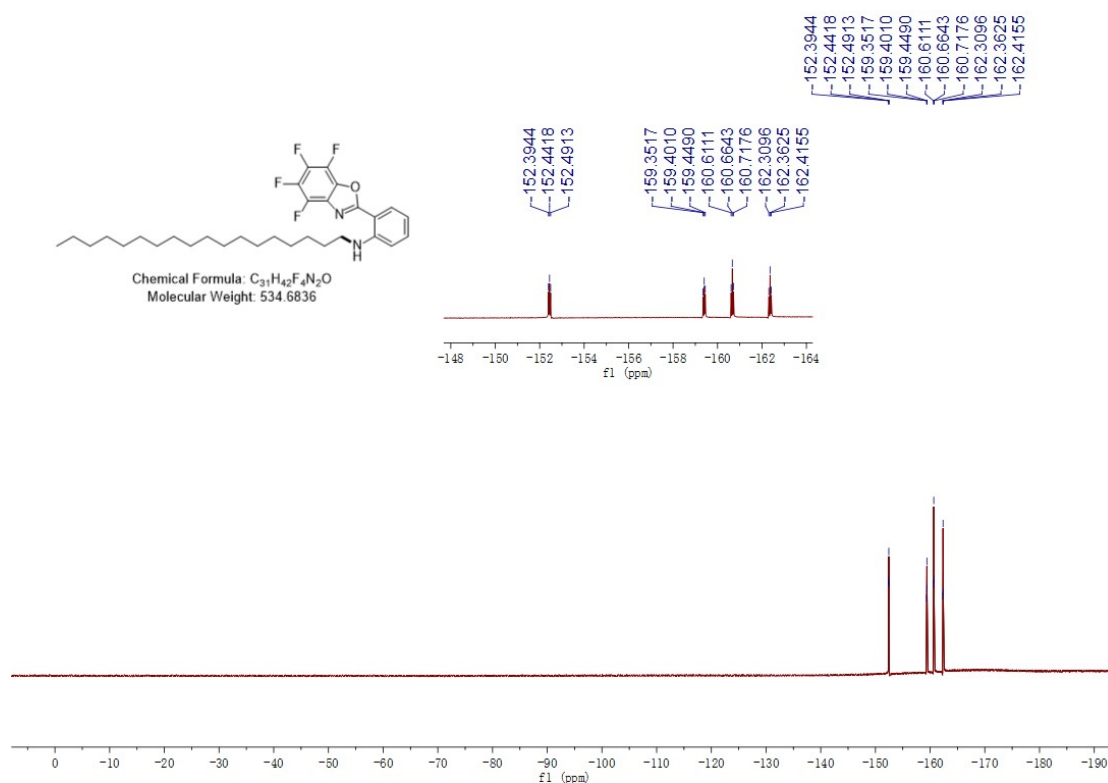

HRMS spectra

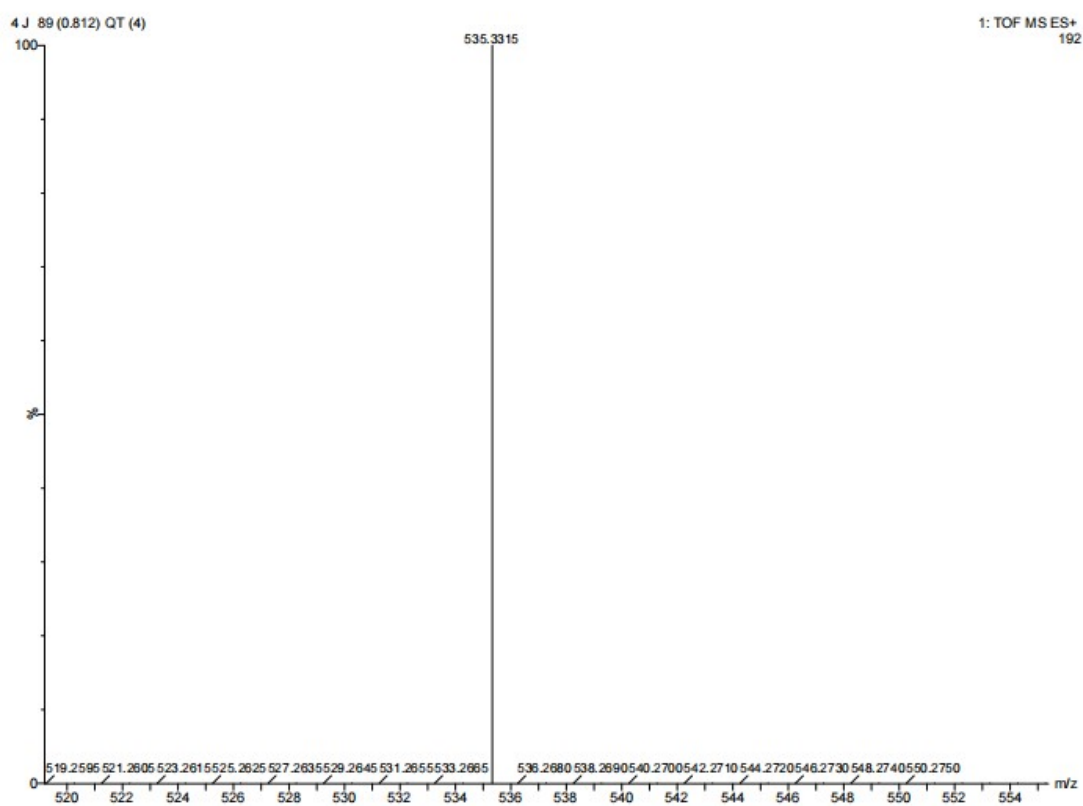

Supplement: d1tc03338g1.pdf [file d1tc03338g1.pdf]
